# Supplementary material for: Harnessing Greenhouse Gases Absorption by Doped Fullerenes with Externally Oriented Electric Field
Source: MDPI journal article supplement (doi:10.3390/molecules27092968), 2022-05-06

## *Supporting Information for*

# **Harnessing Greenhouse Gases Absorption by Doped Fullerenes with Externally Oriented Electric Field**

Rodrigo A. Lemos Silva <sup>1,\*</sup>, Daniel F. Scalabrini Machado <sup>2</sup>, Núbia Maria Nunes  
Rodrigues <sup>3</sup>,

Heibbe C. B. de Oliveira <sup>4</sup>, Luciano Ribeiro <sup>3</sup> and Demétrio A. da Silva Filho <sup>1,\*</sup>

<sup>1</sup>Institute of Physics, University of Brasília, 70.919-970, Brasília, Brazil

<sup>2</sup>Laboratório de Modelagem de Sistemas Complexos (LMSC), Instituto de Química, Universidade  
de Brasília, 70919-970, Brasília, Brazil

<sup>3</sup>Laboratório de Estrutura Eletrônica e Dinâmica Molecular (LEEDMOL), Instituto de Química,  
Universidade Federal de Goiás, Goiânia, Brazil

<sup>4</sup>Grupo de Química Teórica e Estrutural de Anápolis, Campus de Ciências Exatas de Anápolis,  
Universidade Estadual de Goiás, Anápolis, Brazil

\*Correspondence: silvarodrigo021@gmail.com\* (R.A.L.S.); dasf@unb.br\* (D.A.d.S.F.)

## **Contents**

|                                                                                                                                                                                                                                                                                                                                                                 |    |
|-----------------------------------------------------------------------------------------------------------------------------------------------------------------------------------------------------------------------------------------------------------------------------------------------------------------------------------------------------------------|----|
| <b>Figure S1.</b> Orientation of the electric field vector with respect to the C <sub>19</sub> Si cage.....                                                                                                                                                                                                                                                     | 3  |
| <b>Table S1.</b> Optimized coordinates for C <sub>20</sub> and C <sub>19</sub> Si fullerenes at theoretical levels<br>ωB97XD/6-31G(d) and ωB97XD/6-311+G(d,p). Electric field F in atomic units and<br>Total energies in hartree. ....                                                                                                                          | 3  |
| <b>Table S2.</b> Optimized coordinates for the dimers formed by pure and doped fullerenes<br>and CO, CO <sub>2</sub> and N <sub>2</sub> gases in each of the studied field values. Electric field F in atomic<br>units and BSSE-corrected adsorption energies in electron-volts. ....                                                                           | 4  |
| <b>Table S3.</b> Frontier orbital energies (in eV) for C <sub>20</sub> and C <sub>19</sub> Si fullerenes. Percentual increase<br>of the HOMO-LUMO gap, ΔE <sub>HL</sub> is also shown. ....                                                                                                                                                                     | 16 |
| <b>Table S4.</b> Si-C bond lengths and Merz-Kollmann (MK) charges on the Si-atom and<br>adjacent carbons. ....                                                                                                                                                                                                                                                  | 17 |
| <b>Table S5.</b> Adsorption energies (in eV), E <sub>ads</sub> , and adsorption energy with and without<br>BSSE corrections, E <sub>ads</sub> (BSSE), for the dimers formed between C <sub>20</sub> fullerenes with<br>CO, CO <sub>2</sub> and N <sub>2</sub> molecules calculated with the theoretical levels ωB97XD /6-31G(d)<br>and ωB97XD/6-311+G(d,p)..... | 17 |
| <b>Table S6.</b> Externally oriented electric field effect on the BSSE correction, adsorption<br>energies, E <sub>ads</sub> , and BSSE corrected, E <sub>ads</sub> (BSSE), for the interaction of C <sub>20</sub> and C <sub>19</sub> Si                                                                                                                        |    |

fullerenes with the CO, CO<sub>2</sub> and N<sub>2</sub> molecules as obtained at the  $\omega$ B97XD/6-31G(d) and  $\omega$ B97XD/6-311+G(d,p) levels of theory. Adjusted adsorption energy,  $E_{\text{ads}}(\text{fit})$  and the R-squared coefficient of determination,  $R^2$ , are also presented. All energies in eV. .... 18

**Table S7.** Topological parameters calculated using the Quantum Theory of Atoms in Molecules (QTAIM) with the theoretical level  $\omega$ B97XD /6-31G(d). Results are presented for all dimers formed by C<sub>20</sub> and C<sub>19</sub>Si fullerenes with adsorbed gas molecules. The results were obtained for all electric field values and are all presented in atomic units. .... 20

**Table S8.** Topological parameters calculated using the Quantum Theory of Atoms in Molecules (QTAIM) with the theoretical level  $\omega$ B97XD /6-311+G(d,p). Results are presented for all dimers formed by C<sub>20</sub> and C<sub>19</sub>Si fullerenes with adsorbed gas molecules. The results were obtained for all electric field values and are all presented in atomic units. .... 22

**Table S9.** Critical bond points, BCP, isosurfaces and scatter plots for the dimers formed by C<sub>20</sub> and C<sub>19</sub>Si fullerenes with the adsorbed gas molecules. The results were obtained for all electric field values using both the theoretical level  $\omega$ B97XD/6-31G(d) and  $\omega$ B97XD/6-311+G(d,p)..... 23

**Table S10.** Energies (in eV) of the HOMO,  $E_{\text{H}}$ , LUMO,  $E_{\text{L}}$  and the gap between them,  $E_{\text{HL}}$ , calculated with the theoretical levels  $\omega$ B97XD/6-31G(d) and  $\omega$ B97XD/6-311+G(d,p), for the dimers. The percentual change in the fullerene energy gap after adsorbing the gas, in relation to the fullerene energy gap before adsorption, is represented by  $\Delta E_{\text{HL}}$  (in %). Positive values of  $\Delta E_{\text{HL}}$  indicate an increase in the gap, negative values indicate a reduction..... 19

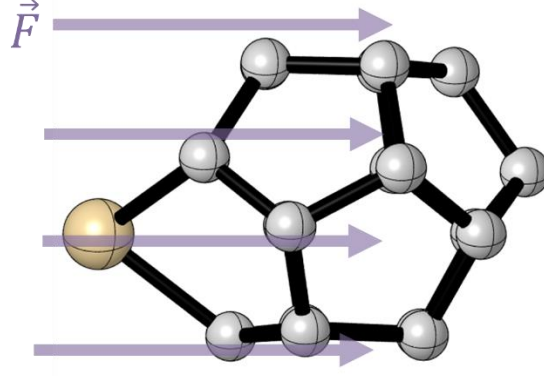

**Figure S1.** Orientation of the electric field vector with respect to the  $C_{19}Si$  cage.

**Table S 1.** Optimized coordinates for  $C_{20}$  and  $C_{19}Si$  fullerenes at theoretical levels  $\omega B97XD/6-31G(d)$  and  $\omega B97XD/6-311+G(d,p)$ . Electric field  $F$  in atomic units and Total energies in hartree.

| $\omega B97XD/6-31G(d)$ |             |             |             | $\omega B97XD/6-311+G(d,p)$ |             |             |             |
|-------------------------|-------------|-------------|-------------|-----------------------------|-------------|-------------|-------------|
| $C_{20}$                |             |             |             |                             |             |             |             |
| $F = 0.000$             |             |             |             | $F = 0.000$                 |             |             |             |
| $Energy = -761.177568$  |             |             |             | $Energy = -761.327563$      |             |             |             |
| C                       | 1.96817100  | -0.00013300 | -0.69597200 | C                           | 1.96549500  | -0.00012400 | -0.69506900 |
| C                       | 1.17416600  | -1.17719400 | -1.11374100 | C                           | 1.17269000  | -1.17611700 | -1.11335400 |
| C                       | 1.96818000  | 0.00019900  | 0.69595700  | C                           | 1.96550400  | 0.00019000  | 0.69505300  |
| C                       | 1.17417700  | -1.17663900 | 1.11421000  | C                           | 1.17268800  | -1.17556800 | 1.11383100  |
| C                       | 0.76585100  | -1.94678400 | 0.00041000  | C                           | 0.76534100  | -1.94358200 | 0.00041000  |
| C                       | 1.17413600  | 1.17723200  | 1.11373200  | C                           | 1.17266000  | 1.17615500  | 1.11334400  |
| C                       | -0.00000400 | 0.71876000  | 1.80649800  | C                           | -0.00000400 | 0.71793600  | 1.80537200  |
| C                       | 0.00002100  | -0.71792800 | 1.80682100  | C                           | 0.00002000  | -0.71709800 | 1.80568900  |
| C                       | 0.76578600  | 1.94680900  | -0.00041700 | C                           | 0.76527500  | 1.94360700  | -0.00041600 |
| C                       | -0.76585100 | 1.94678400  | -0.00041000 | C                           | -0.76534100 | 1.94358200  | -0.00041000 |
| C                       | -1.17416600 | 1.17719400  | 1.11374100  | C                           | -1.17269000 | 1.17611700  | 1.11335400  |
| C                       | 1.17412600  | 1.17667800  | -1.11422100 | C                           | 1.17263900  | 1.17560800  | -1.11384100 |
| C                       | -0.00002100 | 0.71792800  | -1.80682100 | C                           | -0.00002000 | 0.71709800  | -1.80568900 |
| C                       | -1.17417700 | 1.17663900  | -1.11421000 | C                           | -1.17268800 | 1.17556800  | -1.11383100 |
| C                       | 0.00000400  | -0.71876000 | -1.80649800 | C                           | 0.00000400  | -0.71793600 | -1.80537200 |
| C                       | -1.17413600 | -1.17723200 | -1.11373200 | C                           | -1.17266000 | -1.17615500 | -1.11334400 |
| C                       | -1.96818000 | -0.00019900 | -0.69595700 | C                           | -1.96550400 | -0.00019000 | -0.69505300 |
| C                       | -1.96817000 | 0.00013300  | 0.69597200  | C                           | -1.96549500 | 0.00012400  | 0.69506900  |
| C                       | -1.17412600 | -1.17667800 | 1.11422100  | C                           | -1.17263900 | -1.17560800 | 1.11384100  |
| C                       | -0.76578600 | -1.94680900 | 0.00041700  | C                           | -0.76527500 | -1.94360700 | 0.00041600  |
| $C_{19}Si$              |             |             |             |                             |             |             |             |
| $F = 0.000$ a.u.        |             |             |             | $F = 0.000$ a.u.            |             |             |             |
| $Energy = -1012.776536$ |             |             |             | $Energy = -1012.776536$     |             |             |             |
| C                       | 0.91421500  | -1.35551500 | 1.29928900  | C                           | 0.91350600  | -1.84301600 | 0.34754400  |
| C                       | -0.46189100 | -1.63458100 | 0.89484300  | C                           | -0.46149100 | -1.85569100 | -0.14347700 |
| C                       | 0.91450100  | -0.06538400 | 1.87665100  | C                           | 0.91394900  | -1.07876600 | 1.53446200  |
| C                       | -0.46174800 | 0.42245100  | 1.81454000  | C                           | -0.46096700 | -0.63649900 | 1.74873400  |
| C                       | -1.34175300 | -0.58521000 | 1.30795100  | C                           | -1.33934700 | -1.20253900 | 0.77463600  |
| C                       | 1.74935900  | 0.76130800  | 1.05169500  | C                           | 1.74766000  | 0.06292500  | 1.29723800  |

|    |             |             |             |    |             |             |             |
|----|-------------|-------------|-------------|----|-------------|-------------|-------------|
| C  | 0.91452400  | 1.80318500  | 0.52415000  | C  | 0.91405800  | 1.22253600  | 1.42223800  |
| C  | -0.46154200 | 1.59262900  | 0.96830600  | C  | -0.46085100 | 0.80361500  | 1.67892200  |
| C  | 2.40815000  | 0.00005600  | -0.00001200 | C  | 2.40412100  | -0.00015800 | -0.00004700 |
| C  | 1.74933200  | 0.53028200  | -1.18500300 | C  | 1.74775700  | 1.09179100  | -0.70348400 |
| C  | 0.91451600  | 1.65802200  | -0.88145600 | C  | 0.91411000  | 1.86820400  | 0.16696600  |
| C  | 1.74918000  | -1.29269300 | 0.13354700  | C  | 1.74732600  | -1.15578700 | -0.59420500 |
| C  | 0.91418900  | -1.59240900 | -0.99460900 | C  | 0.91351100  | -0.78957200 | -1.70099700 |
| C  | 0.91484500  | -0.44771000 | -1.82373900 | C  | 0.91405500  | 0.62050800  | -1.77010800 |
| C  | -0.46181500 | -1.78319500 | -0.54180800 | C  | -0.46143000 | -1.19624900 | -1.42584500 |
| C  | -1.34137600 | -0.84011300 | -1.16072200 | C  | -1.33919400 | -0.06934500 | -1.42861400 |
| C  | -0.46141100 | 0.04244100  | -1.86261100 | C  | -0.46083400 | 1.05213400  | -1.53507800 |
| C  | -0.46148600 | 1.36092700  | -1.27331800 | C  | -0.46078800 | 1.83309200  | -0.32315800 |
| C  | -1.34103000 | 1.42507400  | -0.14712300 | C  | -1.33885800 | 1.27204300  | 0.65410100  |
| Si | -2.72089700 | 0.00018600  | -0.00024400 | Si | -2.71984000 | 0.00033200  | 0.00007400  |

**Table S2.** Optimized coordinates for the dimers formed by pure and doped fullerenes and CO, CO<sub>2</sub> and N<sub>2</sub> gases in each of the studied field values. Electric field  $F$  in atomic units and BSSE-corrected adsorption energies in electron-volts.

| $\omega$ B97XD/6-31G(d)                      |            |             |             | $\omega$ B97XD/6-311+G(d,p)                  |            |             |             |
|----------------------------------------------|------------|-------------|-------------|----------------------------------------------|------------|-------------|-------------|
| C <sub>20</sub> -CO                          |            |             |             |                                              |            |             |             |
| $F = 0.000$<br>$E_{ads}(BSSE) = -0.04027087$ |            |             |             | $F = 0.000$<br>$E_{ads}(BSSE) = -0.04215341$ |            |             |             |
| O                                            | 3.34694300 | -1.80506800 | 0.01811600  | O                                            | 3.31257900 | -1.80409600 | -0.00638300 |
| C                                            | 2.84804700 | -0.78483600 | 0.01561800  | C                                            | 2.81785900 | -0.79251200 | -0.01452300 |
| C                                            | 7.10590900 | 1.54087900  | -1.04107100 | C                                            | 7.10338800 | 1.53702400  | -1.03496000 |
| C                                            | 8.15189300 | 0.88878000  | -1.78265500 | C                                            | 8.14497600 | 0.88517100  | -1.78004600 |
| C                                            | 7.68118100 | 2.17225900  | 0.08656100  | C                                            | 7.68248900 | 2.16892800  | 0.08883400  |
| C                                            | 9.18190700 | 1.87216300  | 0.04331300  | C                                            | 9.18249800 | 1.87070500  | 0.03835600  |
| C                                            | 9.40715300 | 1.08075200  | -1.10748700 | C                                            | 9.40199500 | 1.07971400  | -1.11231000 |
| C                                            | 7.15262400 | 1.45547100  | 1.18492300  | C                                            | 7.16149800 | 1.45667800  | 1.19085900  |
| C                                            | 8.22795100 | 0.74904100  | 1.82827900  | C                                            | 8.23985000 | 0.75204300  | 1.82799100  |
| C                                            | 9.45442200 | 0.99510700  | 1.11853300  | C                                            | 9.46152700 | 0.99890800  | 1.11321900  |
| C                                            | 6.13412700 | 0.47380400  | 0.74935500  | C                                            | 6.14309600 | 0.47282300  | 0.76014300  |
| C                                            | 6.68897000 | -0.85068600 | 1.10429100  | C                                            | 6.70056200 | -0.84895500 | 1.11459200  |
| C                                            | 7.94490600 | -0.65854600 | 1.77880900  | C                                            | 7.95835300 | -0.65429300 | 1.78176100  |
| C                                            | 6.10467400 | 0.52802400  | -0.64163500 | C                                            | 6.10638300 | 0.52492400  | -0.62850900 |
| C                                            | 6.64176400 | -0.76501000 | -1.12208600 | C                                            | 6.64108600 | -0.76808600 | -1.11135600 |
| C                                            | 6.91461300 | -1.64107000 | -0.04664800 | C                                            | 6.92053300 | -1.63887000 | -0.03623700 |
| C                                            | 7.86888600 | -0.51885300 | -1.83116300 | C                                            | 7.86347500 | -0.52121200 | -1.82547600 |
| C                                            | 8.94380100 | -1.22584200 | -1.18837800 | C                                            | 8.94131100 | -1.22636600 | -1.18876800 |
| C                                            | 8.41492500 | -1.94243400 | -0.08994000 | C                                            | 8.42004700 | -1.93856800 | -0.08673800 |
| C                                            | 8.99049600 | -1.31120700 | 1.03774600  | C                                            | 8.99942000 | -1.30661200 | 1.03706300  |
| C                                            | 9.99192700 | -0.29814000 | 0.63786700  | C                                            | 9.99668100 | -0.29435500 | 0.63014900  |
| C                                            | 9.96248900 | -0.24398100 | -0.75235100 | C                                            | 9.96000400 | -0.24238700 | -0.75766300 |
| C <sub>20</sub> -CO <sub>2</sub>             |            |             |             |                                              |            |             |             |
| $F = 0.000$<br>$E_{ads}(BSSE) = -0.06556463$ |            |             |             | $F = 0.000$<br>$E_{ads}(BSSE) = -0.07502922$ |            |             |             |
| C                                            | 0.58561400 | 0.04675200  | -0.41514800 | C                                            | 0.62769000 | 0.12142600  | -0.49236200 |
| O                                            | 0.65222200 | -0.11126900 | 0.73682800  | O                                            | 0.75707800 | -0.23508500 | 0.60113400  |
| O                                            | 0.51242700 | 0.20215400  | -1.56707300 | O                                            | 0.49117600 | 0.47711300  | -1.58391000 |

|   |            |             |             |   |            |             |             |
|---|------------|-------------|-------------|---|------------|-------------|-------------|
| C | 5.09326500 | 1.57819800  | -0.99626800 | C | 5.00397000 | 1.52753400  | -1.00164100 |
| C | 5.80464400 | 0.60183500  | -1.77425100 | C | 5.71549600 | 0.55341100  | -1.78089600 |
| C | 5.95372500 | 2.06216100  | 0.02663500  | C | 5.90262700 | 2.05078800  | 0.04246900  |
| C | 7.27627200 | 1.30785900  | -0.11891200 | C | 7.16704700 | 1.29046200  | -0.10866300 |
| C | 7.12118600 | 0.42514100  | -1.21987300 | C | 7.03427400 | 0.40510400  | -1.23268600 |
| C | 5.35427900 | 1.61579500  | 1.21969700  | C | 5.35171100 | 1.66819300  | 1.26010000  |
| C | 6.22410900 | 0.63410500  | 1.81685000  | C | 6.27427100 | 0.67467200  | 1.83967500  |
| C | 7.38779700 | 0.45057200  | 0.99445500  | C | 7.42958600 | 0.51335000  | 1.03799800  |
| C | 4.04978100 | 0.96293300  | 0.93543900  | C | 4.11288600 | 0.91728400  | 0.94599300  |
| C | 4.20411500 | -0.43844000 | 1.34568000  | C | 4.27788600 | -0.44201700 | 1.38186500  |
| C | 5.51978100 | -0.61591700 | 1.89887700  | C | 5.59670100 | -0.58935000 | 1.92711900  |
| C | 3.87380900 | 0.96468100  | -0.44627600 | C | 3.85687900 | 0.91448400  | -0.44060900 |
| C | 3.93751600 | -0.46425400 | -0.86908600 | C | 3.88001800 | -0.55067700 | -0.89125700 |
| C | 4.04882400 | -1.32110100 | 0.24313600  | C | 4.14760100 | -1.32531200 | 0.25607900  |
| C | 5.10192200 | -0.64775400 | -1.69253700 | C | 5.03865800 | -0.70987900 | -1.69043600 |
| C | 5.97097300 | -1.62925700 | -1.09523500 | C | 5.96079200 | -1.70393100 | -1.11290200 |
| C | 5.37045100 | -2.07664900 | 0.09669500  | C | 5.40990900 | -2.08744500 | 0.10441900  |
| C | 6.23055200 | -1.59222600 | 1.12033500  | C | 6.30910300 | -1.56572100 | 1.14991700  |
| C | 7.44906800 | -0.97744000 | 0.57078000  | C | 7.45273600 | -0.94965300 | 0.58800900  |
| C | 7.27766900 | -0.97788200 | -0.81074600 | C | 7.20190500 | -0.95475800 | -0.79940900 |

**C<sub>20</sub>-N<sub>2</sub>**

| $F = 0.000$<br>$E_{ads}(BSSE) = -0.04191301$ |            |             |             | $F = 0.000$<br>$E_{ads}(BSSE) = -0.04214772$ |            |             |             |
|----------------------------------------------|------------|-------------|-------------|----------------------------------------------|------------|-------------|-------------|
| N                                            | 0.58478100 | -1.97944200 | -0.13254500 | N                                            | 0.41249400 | -1.57070000 | -0.52204300 |
| N                                            | 0.22177400 | -0.96292700 | 0.08912200  | N                                            | 0.26623900 | -1.40781400 | 0.54810000  |
| C                                            | 4.40572800 | 1.54579000  | -1.08795800 | C                                            | 4.42922300 | 1.53961000  | -1.11932400 |
| C                                            | 5.43565800 | 0.83559500  | -1.79713600 | C                                            | 5.46409300 | 0.81720000  | -1.80600800 |
| C                                            | 4.99058300 | 2.18474400  | 0.03067400  | C                                            | 5.00261600 | 2.18398500  | -0.00206400 |
| C                                            | 6.48036700 | 1.83084800  | 0.01615600  | C                                            | 6.49079500 | 1.82649200  | 0.00383600  |
| C                                            | 6.68852900 | 0.99870000  | -1.10939100 | C                                            | 6.70972700 | 0.98594100  | -1.10919600 |
| C                                            | 4.42075000 | 1.52060900  | 1.14085000  | C                                            | 4.41997700 | 1.53416600  | 1.10964100  |
| C                                            | 5.46059400 | 0.79227800  | 1.81698700  | C                                            | 5.44849600 | 0.81164400  | 1.80531900  |
| C                                            | 6.70466700 | 0.97306900  | 1.11750000  | C                                            | 6.69886200 | 0.98085900  | 1.11758200  |
| C                                            | 3.37182400 | 0.56522500  | 0.71648000  | C                                            | 3.37393700 | 0.58001300  | 0.68591700  |
| C                                            | 3.87209800 | -0.76789100 | 1.11391300  | C                                            | 3.86402300 | -0.75134700 | 1.10645200  |
| C                                            | 5.12541800 | -0.60470100 | 1.80109900  | C                                            | 5.10978200 | -0.58293000 | 1.80343500  |
| C                                            | 3.36178600 | 0.58242300  | -0.67534600 | C                                            | 3.37963000 | 0.58144200  | -0.70384900 |
| C                                            | 3.85604200 | -0.74219700 | -1.11333800 | C                                            | 3.87486400 | -0.74622700 | -1.12013500 |
| C                                            | 4.08070600 | -1.59950600 | -0.01180600 | C                                            | 4.08258200 | -1.59213100 | -0.00644600 |
| C                                            | 5.10045000 | -0.56139500 | -1.81229800 | C                                            | 5.12527800 | -0.57739200 | -1.80795000 |
| C                                            | 6.13996400 | -1.29024100 | -1.13648600 | C                                            | 6.15336100 | -1.30002500 | -1.11208200 |
| C                                            | 5.56995800 | -1.95434700 | -0.02629900 | C                                            | 5.57063700 | -1.95000100 | -0.00048500 |
| C                                            | 6.15504600 | -1.31547200 | 1.09238600  | C                                            | 6.14420400 | -1.30545700 | 1.11664600  |
| C                                            | 7.19898300 | -0.35211500 | 0.67951700  | C                                            | 7.19418600 | -0.34733900 | 0.70102400  |
| C                                            | 7.18908200 | -0.33498300 | -0.71208300 | C                                            | 7.19978200 | -0.34592700 | -0.68837000 |

**C<sub>19</sub>Si-CO**

| $F = 0.000$<br>$E_{ads}(BSSE) = -0.70264080$ |            |             |             | $F = 0.000$<br>$E_{ads}(BSSE) = -0.73799673$ |            |             |            |
|----------------------------------------------|------------|-------------|-------------|----------------------------------------------|------------|-------------|------------|
| O                                            | 2.01502800 | -0.01037600 | -0.00025500 | O                                            | 2.01053700 | -0.01993600 | 0.00877900 |
| C                                            | 3.14119300 | -0.01035200 | 0.00416500  | C                                            | 3.12664200 | -0.01236700 | 0.02139200 |
| C                                            | 8.18173800 | -1.37815000 | 1.29081900  | C                                            | 8.18322500 | -1.37772500 | 1.29143500 |
| C                                            | 6.84077900 | -1.70008500 | 0.93491700  | C                                            | 6.84358000 | -1.69783900 | 0.93565400 |

|    |            |             |             |    |            |             |             |
|----|------------|-------------|-------------|----|------------|-------------|-------------|
| C  | 8.17811900 | -0.09251600 | 1.86489000  | C  | 8.18137600 | -0.09268300 | 1.86216600  |
| C  | 6.80722200 | 0.39724100  | 1.83179100  | C  | 6.81098700 | 0.39819100  | 1.83171700  |
| C  | 5.91034300 | -0.66680100 | 1.53729200  | C  | 5.91495700 | -0.66098500 | 1.53607100  |
| C  | 8.99384900 | 0.72449500  | 0.99628100  | C  | 8.99552200 | 0.72393400  | 0.99540100  |
| C  | 8.17088900 | 1.80029200  | 0.49388800  | C  | 8.17432400 | 1.79810700  | 0.49239500  |
| C  | 6.80234500 | 1.60888300  | 0.95395200  | C  | 6.80639800 | 1.60939900  | 0.95402600  |
| C  | 9.61024300 | -0.02434200 | -0.04136000 | C  | 9.60982200 | -0.02548100 | -0.04224800 |
| C  | 9.11370900 | 0.54602200  | -1.28538900 | C  | 9.10965000 | 0.54232300  | -1.28439600 |
| C  | 8.17025500 | 1.65582400  | -0.90653600 | C  | 8.17203800 | 1.65651400  | -0.90645900 |
| C  | 9.12023000 | -1.38623300 | 0.11429200  | C  | 9.11686600 | -1.38546600 | 0.11186300  |
| C  | 8.26240700 | -1.59477900 | -0.96999200 | C  | 8.26108300 | -1.59574600 | -0.97082300 |
| C  | 8.25819600 | -0.42346100 | -1.81759800 | C  | 8.25698200 | -0.42505000 | -1.81896400 |
| C  | 6.87070400 | -1.78477600 | -0.50104900 | C  | 6.87091900 | -1.78145600 | -0.49872700 |
| C  | 6.00349900 | -0.89551100 | -1.22489600 | C  | 6.00500400 | -0.89019800 | -1.21777000 |
| C  | 6.86375400 | 0.07422800  | -1.84728800 | C  | 6.86434500 | 0.07480800  | -1.84356300 |
| C  | 6.82876700 | 1.41163900  | -1.31889100 | C  | 6.83209500 | 1.41154400  | -1.31692500 |
| C  | 5.90151500 | 1.65588400  | -0.14531800 | C  | 5.90626700 | 1.65429600  | -0.14124800 |
| Si | 5.14268300 | 0.04177400  | 0.07515100  | Si | 5.13484700 | 0.04471700  | 0.07762900  |

**C<sub>19</sub>Si-CO<sub>2</sub>**

| $F = 0.000$<br>$E_{ads}(BSSE) = -0.06827564$ | $F = 0.000$<br>$E_{ads}(BSSE) = -0.07742641$ |
|----------------------------------------------|----------------------------------------------|
| C -0.44956200 -0.05900700 -0.12760900        | C -0.26804500 0.10709200 -0.28998600         |
| O -0.69772900 -0.29614200 0.98521300         | O -0.72140800 -0.26570200 0.70588900         |
| O -0.23344200 0.17451900 -1.24866500         | O 0.15830400 0.48185700 -1.29904000          |
| C 6.95651900 -1.39165200 1.20360200          | C 7.08254700 -1.35536100 1.17685600          |
| C 5.52910600 -1.60788700 0.97902400          | C 5.65973000 -1.65581400 1.04510600          |
| C 7.08667300 -0.11025000 1.78487900          | C 7.17426400 -0.06525500 1.74238100          |
| C 5.73615500 0.43500500 1.90584000           | C 5.80598000 0.40172800 1.94720700           |
| C 4.75618300 -0.52928900 1.51216500          | C 4.86247400 -0.61993900 1.62105500          |
| C 7.84214900 0.69165400 0.86452200           | C 7.82108900 0.77204600 0.77491700           |
| C 6.99122600 1.77351300 0.45643700           | C 6.88483500 1.79718600 0.41622100           |
| C 5.67653800 1.61417000 1.07390900           | C 5.62487100 1.56727700 1.11727600           |
| C 8.32581500 -0.08312500 -0.26933200         | C 8.27189400 0.01677100 -0.38435100          |
| C 7.54225300 0.48848700 -1.35497200          | C 7.39241900 0.53430600 -1.42203700          |
| C 6.80285500 1.64594700 -0.93827400          | C 6.61619600 1.64827200 -0.96124400          |
| C 7.63523200 -1.34799300 -0.06046100         | C 7.67486700 -1.28516600 -0.12697700         |
| C 6.64947800 -1.59964100 -1.07311900         | C 6.64351700 -1.59856800 -1.07253100         |
| C 6.59135100 -0.44600400 -1.88696900         | C 6.46652700 -0.45779200 -1.88468700         |
| C 5.33676700 -1.73861600 -0.44664800         | C 5.38498800 -1.80811300 -0.36252400         |
| C 4.42566000 -0.75366400 -0.94110000         | C 4.39019800 -0.88153200 -0.80064200         |
| C 5.24358400 0.10120100 -1.74461100          | C 5.10254400 0.01168200 -1.65813800          |
| C 5.37630000 1.41081300 -1.15002200          | C 5.19598100 1.32945500 -1.08041300          |
| C 4.65373100 1.49959200 0.08104700           | C 4.55108300 1.38501600 0.19297500           |
| Si 3.25102100 0.12812000 0.39547000          | Si 3.25300600 -0.05969500 0.60301100         |

**C<sub>19</sub>Si-N<sub>2</sub>**

| $F = 0.000$                   |             |             |             | $F = 0.000$                   |             |             |             |
|-------------------------------|-------------|-------------|-------------|-------------------------------|-------------|-------------|-------------|
| $E_{ads}(BSSE) = -0.01722895$ |             |             |             | $E_{ads}(BSSE) = -0.04477245$ |             |             |             |
| N                             | -2.66042400 | -0.12112300 | -0.02744200 | N                             | -1.31609500 | 0.56939400  | -1.66307200 |
| N                             | -2.14664100 | -0.25597700 | -0.99254600 | N                             | -0.23966900 | 0.72589600  | -1.56415600 |
| C                             | 5.53073000  | -1.36769300 | 1.24568000  | C                             | 5.74786800  | -1.18227700 | 1.30374800  |
| C                             | 4.09734300  | -1.57680900 | 1.05314900  | C                             | 4.33401400  | -1.46336600 | 1.53817700  |
| C                             | 5.68206700  | -0.07708100 | 1.80067100  | C                             | 5.93814000  | 0.19077800  | 1.56973700  |

|    |            |             |             |    |            |             |             |
|----|------------|-------------|-------------|----|------------|-------------|-------------|
| C  | 4.33835200 | 0.48106700  | 1.93782900  | C  | 4.63730400 | 0.72654000  | 1.96223900  |
| C  | 3.34315600 | -0.48192200 | 1.58018500  | C  | 3.66086400 | -0.31237300 | 2.05081100  |
| C  | 6.42540400 | 0.70185800  | 0.85109100  | C  | 6.35139800 | 0.80283600  | 0.34089700  |
| C  | 5.57471300 | 1.78272700  | 0.43998300  | C  | 5.34476700 | 1.76237500  | -0.00784900 |
| C  | 4.27128100 | 1.64500600  | 1.08598500  | C  | 4.26593400 | 1.70954600  | 0.97492200  |
| C  | 6.88079900 | -0.09735900 | -0.27775000 | C  | 6.55701300 | -0.17846700 | -0.71437700 |
| C  | 6.07996500 | 0.46064600  | -1.35813400 | C  | 5.46879700 | 0.14834600  | -1.62411100 |
| C  | 5.35780100 | 1.63132100  | -0.94812300 | C  | 4.79136400 | 1.35203200  | -1.23982000 |
| C  | 6.18465500 | -1.35272900 | -0.03199400 | C  | 6.04810400 | -1.38695800 | -0.08325700 |
| C  | 5.17699400 | -1.61481300 | -1.02003200 | C  | 4.84410600 | -1.85219100 | -0.70766000 |
| C  | 5.11145100 | -0.47579400 | -1.85367500 | C  | 4.48101200 | -0.88953800 | -1.67391600 |
| C  | 3.87583900 | -1.73200000 | -0.36550900 | C  | 3.76858400 | -1.88183100 | 0.27963700  |
| C  | 2.96229100 | -0.74824200 | -0.85875100 | C  | 2.68904100 | -1.03210800 | -0.11287400 |
| C  | 3.77089700 | 0.08462400  | -1.69453100 | C  | 3.18925600 | -0.34676000 | -1.26185100 |
| C  | 3.92542600 | 1.40358300  | -1.12726900 | C  | 3.38348800 | 1.05537400  | -0.99033300 |
| C  | 3.22787600 | 1.51957900  | 0.11602500  | C  | 3.02269400 | 1.37758100  | 0.35379000  |
| Si | 1.81656300 | 0.16712900  | 0.48402400  | Si | 1.85855400 | 0.08117100  | 1.30818500  |

**C<sub>19</sub>Si-CO**

| $F = 0.001$<br>$E_{ads}(BSSE) = -0.74916933$ |            |             |             | $F = 0.001$<br>$E_{ads}(BSSE) = -0.78821735$ |            |             |             |
|----------------------------------------------|------------|-------------|-------------|----------------------------------------------|------------|-------------|-------------|
| O                                            | 1.99978300 | -0.01200700 | -0.00168200 | O                                            | 2.00507900 | -0.01622700 | 0.01401400  |
| C                                            | 3.12640300 | -0.00644800 | 0.00977500  | C                                            | 3.12040700 | -0.00712700 | 0.02868000  |
| C                                            | 8.18551700 | -1.37801600 | 1.28937700  | C                                            | 8.18555300 | -1.37796100 | 1.29035100  |
| C                                            | 6.84233700 | -1.69669200 | 0.93882600  | C                                            | 6.84434900 | -1.69531900 | 0.93850200  |
| C                                            | 8.18666000 | -0.09188400 | 1.86270000  | C                                            | 8.18727300 | -0.09223700 | 1.86004800  |
| C                                            | 6.81531800 | 0.40070300  | 1.83327400  | C                                            | 6.81642400 | 0.40056400  | 1.83261800  |
| C                                            | 5.91679600 | -0.65941800 | 1.54123300  | C                                            | 5.91936800 | -0.65558200 | 1.53917900  |
| C                                            | 8.99970500 | 0.72205600  | 0.99011600  | C                                            | 8.99929700 | 0.72197000  | 0.99030500  |
| C                                            | 8.17919200 | 1.79968800  | 0.48930800  | C                                            | 8.18023800 | 1.79709100  | 0.48809100  |
| C                                            | 6.81044300 | 1.61202500  | 0.95347400  | C                                            | 6.81183100 | 1.61169500  | 0.95292900  |
| C                                            | 9.61209200 | -0.03030800 | -0.04917600 | C                                            | 9.61099800 | -0.03032900 | -0.04887700 |
| C                                            | 9.11234600 | 0.53936300  | -1.29160900 | C                                            | 9.10854000 | 0.53679800  | -1.29015700 |
| C                                            | 8.17371300 | 1.65290600  | -0.91112000 | C                                            | 8.17438100 | 1.65352000  | -0.91075600 |
| C                                            | 9.12022900 | -1.39116600 | 0.10979300  | C                                            | 9.11572100 | -1.38892800 | 0.10793500  |
| C                                            | 8.25638500 | -1.59804700 | -0.97128800 | C                                            | 8.25565500 | -1.59886100 | -0.97262600 |
| C                                            | 8.25204300 | -0.42901100 | -1.82046500 | C                                            | 8.25155200 | -0.42988300 | -1.82150600 |
| C                                            | 6.86582500 | -1.78403700 | -0.49663300 | C                                            | 6.86653000 | -1.78101700 | -0.49566700 |
| C                                            | 5.99899400 | -0.89117800 | -1.21569900 | C                                            | 6.00071000 | -0.88754200 | -1.21121400 |
| C                                            | 6.85888800 | 0.07305400  | -1.84523700 | C                                            | 6.85993700 | 0.07344300  | -1.84235400 |
| C                                            | 6.83032100 | 1.41092800  | -1.31767200 | C                                            | 6.83286200 | 1.41050300  | -1.31680800 |
| C                                            | 5.90760900 | 1.65800800  | -0.14157100 | C                                            | 5.91070800 | 1.65522600  | -0.13886500 |
| Si                                           | 5.13686400 | 0.04838600  | 0.08314200  | Si                                           | 5.13005000 | 0.04910800  | 0.08358400  |

**C<sub>19</sub>Si-CO<sub>2</sub>**

| $F = 0.001$<br>$E_{ads}(BSSE) = -0.08110533$ |             |             |             | $F = 0.001$<br>$E_{ads}(BSSE) = -0.08655367$ |             |             |             |
|----------------------------------------------|-------------|-------------|-------------|----------------------------------------------|-------------|-------------|-------------|
| C                                            | 0.29581300  | 0.39203400  | -0.74958400 | C                                            | -4.78429600 | -0.42291500 | -0.00002200 |
| O                                            | -0.66453900 | 0.12557900  | -0.15065000 | O                                            | -5.66717600 | 0.32066100  | -0.00040100 |
| O                                            | 1.25049100  | 0.66396800  | -1.36292000 | O                                            | -3.90664200 | -1.18018700 | 0.00035200  |
| C                                            | 7.32425600  | -1.27519600 | 1.03703200  | C                                            | 2.43400700  | 1.19711100  | 0.70601000  |
| C                                            | 5.93969600  | -1.72597800 | 1.16341700  | C                                            | 1.09506300  | 1.60211300  | 1.12571600  |
| C                                            | 7.37972300  | 0.02537000  | 1.58855500  | C                                            | 2.43388100  | 1.19714000  | -0.70624400 |
| C                                            | 6.02786500  | 0.34651800  | 2.04196300  | C                                            | 1.09486200  | 1.60215800  | -1.12569600 |

|    |            |             |             |    |             |             |             |
|----|------------|-------------|-------------|----|-------------|-------------|-------------|
| C  | 5.15270100 | -0.77336400 | 1.88341600  | C  | 0.29187500  | 1.96058600  | 0.00008900  |
| C  | 7.74682900 | 0.91511500  | 0.52412000  | C  | 2.67324900  | -0.15250200 | -1.12569600 |
| C  | 6.65723200 | 1.83381000  | 0.35137000  | C  | 1.51508100  | -0.57552300 | -1.85771500 |
| C  | 5.57572900 | 1.47809800  | 1.26723000  | C  | 0.52002900  | 0.49295000  | -1.84565400 |
| C  | 8.06223500 | 0.20063900  | -0.70515400 | C  | 2.95690500  | -1.03119100 | -0.00020900 |
| C  | 6.95487700 | 0.61010100  | -1.55953100 | C  | 1.77614900  | -1.88460700 | -0.00012100 |
| C  | 6.15982900 | 1.64165000  | -0.95726300 | C  | 0.95286400  | -1.66076300 | -1.15175300 |
| C  | 7.65888400 | -1.15419200 | -0.35331900 | C  | 2.67345000  | -0.15254700 | 1.12536500  |
| C  | 6.51189600 | -1.58768200 | -1.09938900 | C  | 1.51541100  | -0.57559700 | 1.85757300  |
| C  | 6.06977900 | -0.47948700 | -1.85663000 | C  | 0.95306900  | -1.66080900 | 1.15166700  |
| C  | 5.43120200 | -1.92110800 | -0.17405300 | C  | 0.52035700  | 0.49287600  | 1.84573200  |
| C  | 4.27880200 | -1.10955100 | -0.41609700 | C  | -0.69603600 | 0.05388600  | 1.23857500  |
| C  | 4.72580300 | -0.15472200 | -1.38219900 | C  | -0.37734300 | -1.23830900 | 0.72025000  |
| C  | 4.78199800 | 1.17257100  | -0.81942100 | C  | -0.37747100 | -1.23828000 | -0.72008100 |
| C  | 4.37578500 | 1.17253800  | 0.55146200  | C  | -0.69625600 | 0.05393600  | -1.23829700 |
| Si | 3.33097900 | -0.39695900 | 1.17797100  | Si | -1.58989700 | 1.32271000  | 0.00024500  |

**C<sub>19</sub>Si-N<sub>2</sub>**

| $F = 0.001$                   |             |             |  | $F = 0.001$                   |             |             |  |
|-------------------------------|-------------|-------------|--|-------------------------------|-------------|-------------|--|
| $E_{ads}(BSSE) = -0.04514641$ |             |             |  | $E_{ads}(BSSE) = -0.04598611$ |             |             |  |
| N -1.31510200                 | 1.05683100  | -1.32379700 |  | N -5.37064000                 | -0.63226000 | -0.11732600 |  |
| N -0.29099500                 | 0.65716800  | -1.39524700 |  | N -4.31001800                 | -0.69445300 | 0.13647900  |  |
| C 5.88944400                  | -1.14395200 | 1.17613500  |  | C 2.32574400                  | 0.97064100  | 0.56838900  |  |
| C 4.52012600                  | -1.60758400 | 1.39184400  |  | C 1.08579800                  | 1.60432000  | 1.00930200  |  |
| C 5.92197600                  | 0.21696400  | 1.55676500  |  | C 2.25937900                  | 0.88581100  | -0.83949100 |  |
| C 4.57203000                  | 0.56154900  | 1.99842400  |  | C 0.98007000                  | 1.46919500  | -1.23526900 |  |
| C 3.72298200                  | -0.58939600 | 2.00282200  |  | C 0.29412100                  | 2.01446900  | -0.10694200 |  |
| C 6.24347800                  | 0.97265100  | 0.37972300  |  | C 2.26936400                  | -0.50728700 | -1.17720900 |  |
| C 5.12654100                  | 1.83563900  | 0.11853400  |  | C 1.02696300                  | -0.78719400 | -1.83603100 |  |
| C 4.07390600                  | 1.57409400  | 1.09781800  |  | C 0.20901800                  | 0.42253400  | -1.85810200 |  |
| C 6.55184200                  | 0.11495200  | -0.75644200 |  | C 2.46717100                  | -1.35025800 | -0.00670600 |  |
| C 5.41635000                  | 0.38601900  | -1.62896000 |  | C 1.17098700                  | -2.00737200 | 0.09386100  |  |
| C 4.60722700                  | 1.46680400  | -1.14289600 |  | C 0.33883200                  | -1.72716300 | -1.03907300 |  |
| C 6.19186400                  | -1.19318300 | -0.22595700 |  | C 2.37494000                  | -0.37210800 | 1.06789600  |  |
| C 5.04130600                  | -1.74518700 | -0.88290400 |  | C 1.20131900                  | -0.56413600 | 1.86875600  |  |
| C 4.55432300                  | -0.75309100 | -1.76372000 |  | C 0.44682600                  | -1.58903200 | 1.25794800  |  |
| C 3.98909000                  | -1.98311800 | 0.10304200  |  | C 0.38222900                  | 0.64423900  | 1.82258200  |  |
| C 2.81057500                  | -1.23578100 | -0.21126400 |  | C -0.91425400                 | 0.36520800  | 1.29027300  |  |
| C 3.21268700                  | -0.40241400 | -1.30176600 |  | C -0.82104000                 | -0.99016500 | 0.84867900  |  |
| C 3.24567900                  | 0.98675700  | -0.91324800 |  | C -0.88871800                 | -1.07664200 | -0.58733300 |  |
| C 2.86742300                  | 1.15057900  | 0.45624800  |  | C -1.03041900                 | 0.21657600  | -1.17718100 |  |
| Si 1.87378800                 | -0.35030200 | 1.30371400  |  | Si -1.66467000                | 1.68265500  | 0.00570200  |  |

**C<sub>19</sub>Si-CO**

| $F = 0.005$                   |            |             |             | $F = 0.005$                   |            |             |             |
|-------------------------------|------------|-------------|-------------|-------------------------------|------------|-------------|-------------|
| $E_{ads}(BSSE) = -0.95684190$ |            |             |             | $E_{ads}(BSSE) = -1.00925177$ |            |             |             |
| O                             | 1.97416600 | 0.03725900  | -0.02547300 | O                             | 1.97940500 | 0.02780700  | -0.01109300 |
| C                             | 3.09787900 | 0.04225200  | 0.00046800  | C                             | 3.09172700 | 0.04023200  | 0.01880800  |
| C                             | 8.17257100 | -1.38106500 | 1.28549900  | C                             | 8.17245300 | -1.38135500 | 1.28655100  |
| C                             | 6.82584300 | -1.68061900 | 0.93336700  | C                             | 6.82726900 | -1.67842200 | 0.93335000  |
| C                             | 8.18676800 | -0.09636500 | 1.86358100  | C                             | 8.18744000 | -0.09685100 | 1.86046700  |
| C                             | 6.81631600 | 0.40944900  | 1.83425700  | C                             | 6.81715000 | 0.40999300  | 1.83416000  |
| C                             | 5.91159600 | -0.63408000 | 1.53486300  | C                             | 5.91372800 | -0.62876500 | 1.53313700  |
| C                             | 9.00422600 | 0.71080000  | 0.99299600  | C                             | 9.00433200 | 0.71064500  | 0.99351000  |



|    |            |             |             |    |            |             |             |
|----|------------|-------------|-------------|----|------------|-------------|-------------|
| C  | 8.20134500 | 1.79857600  | 0.49398100  | C  | 8.20348100 | 1.79560400  | 0.49307100  |
| C  | 6.82538400 | 1.62561400  | 0.95533300  | C  | 6.82740100 | 1.62640700  | 0.95536000  |
| C  | 9.61391500 | -0.04749200 | -0.05082300 | C  | 9.61316800 | -0.04842700 | -0.05131200 |
| C  | 9.12214900 | 0.53048300  | -1.29244700 | C  | 9.11868200 | 0.52719900  | -1.29182200 |
| C  | 8.19602700 | 1.65304300  | -0.90715700 | C  | 8.19798800 | 1.65364500  | -0.90678500 |
| C  | 9.10561100 | -1.40149900 | 0.10432000  | C  | 9.10036800 | -1.39948600 | 0.10210600  |
| C  | 8.23615900 | -1.59659000 | -0.97895800 | C  | 8.23425000 | -1.59773200 | -0.98078200 |
| C  | 8.24543700 | -0.42799300 | -1.82206200 | C  | 8.24418900 | -0.42940400 | -1.82374800 |
| C  | 6.84397400 | -1.76701800 | -0.50166100 | C  | 6.84370200 | -1.76307700 | -0.50036800 |
| C  | 5.98854000 | -0.85768400 | -1.20999900 | C  | 5.98975200 | -0.85279000 | -1.20510300 |
| C  | 6.85830700 | 0.09230700  | -1.84483900 | C  | 6.85923200 | 0.09338400  | -1.84155800 |
| C  | 6.84945400 | 1.42717700  | -1.31243200 | C  | 6.85307500 | 1.42734600  | -1.31104300 |
| C  | 5.92946100 | 1.67716200  | -0.13564200 | C  | 5.93415700 | 1.67524300  | -0.13242400 |
| Si | 5.11337300 | 0.08274800  | 0.08423300  | Si | 5.10555300 | 0.08526700  | 0.08546400  |

**C<sub>19</sub>Si-CO<sub>2</sub>**

|                               |             |             |             |                               |             |             |             |
|-------------------------------|-------------|-------------|-------------|-------------------------------|-------------|-------------|-------------|
| $F = 0.005$                   |             |             |             | $F = 0.005$                   |             |             |             |
| $E_{ads}(BSSE) = -0.08494219$ |             |             |             | $E_{ads}(BSSE) = -0.09138179$ |             |             |             |
| C                             | 0.32708100  | 0.45075200  | -0.85467000 | C                             | 0.30080200  | 0.47149500  | -0.85094400 |
| O                             | -0.74916700 | 0.24831900  | -0.47170700 | O                             | -0.78330300 | 0.30851100  | -0.49972000 |
| O                             | 1.41181700  | 0.65407600  | -1.24127000 | O                             | 1.39542200  | 0.63560300  | -1.20517100 |
| C                             | 7.37530300  | -1.28206700 | 0.97269100  | C                             | 7.38519000  | -1.27325800 | 0.97407900  |
| C                             | 6.00364900  | -1.76369800 | 1.13139800  | C                             | 6.01746400  | -1.76407600 | 1.13165800  |
| C                             | 7.42338000  | 0.00544100  | 1.55977300  | C                             | 7.42417500  | 0.01382300  | 1.55924900  |
| C                             | 6.07987500  | 0.28503800  | 2.06534900  | C                             | 6.07893200  | 0.28489000  | 2.06238800  |
| C                             | 5.21973600  | -0.84612100 | 1.89973200  | C                             | 5.22728700  | -0.85116400 | 1.89642000  |
| C                             | 7.73572600  | 0.93129300  | 0.50983800  | C                             | 7.73215800  | 0.94148800  | 0.51166900  |
| C                             | 6.62262600  | 1.83086800  | 0.39823500  | C                             | 6.61286600  | 1.83055400  | 0.39572800  |
| C                             | 5.57908700  | 1.42578800  | 1.33824900  | C                             | 5.57212800  | 1.41945500  | 1.33492100  |
| C                             | 8.02770000  | 0.25802500  | -0.75107600 | C                             | 8.02562600  | 0.26701400  | -0.74772300 |
| C                             | 6.87911400  | 0.66828600  | -1.55705800 | C                             | 6.87785000  | 0.66966800  | -1.55837000 |
| C                             | 6.08527900  | 1.66318700  | -0.89811600 | C                             | 6.07828600  | 1.65785200  | -0.89957100 |
| C                             | 7.65949700  | -1.11535600 | -0.42318200 | C                             | 7.67087800  | -1.10989000 | -0.42023200 |
| C                             | 6.49688100  | -1.55072500 | -1.14332200 | C                             | 6.51189500  | -1.54988800 | -1.14008500 |
| C                             | 6.00745400  | -0.43044600 | -1.85266000 | C                             | 6.01600600  | -0.43533700 | -1.85128500 |
| C                             | 5.45422600  | -1.93076000 | -0.19183600 | C                             | 5.47178500  | -1.93610000 | -0.18984600 |
| C                             | 4.27769300  | -1.13545200 | -0.36818100 | C                             | 4.29174200  | -1.14895100 | -0.36848100 |
| C                             | 4.67232000  | -0.14729400 | -1.32438300 | C                             | 4.67961700  | -0.16066800 | -1.32501000 |
| C                             | 4.72087000  | 1.16161300  | -0.72788000 | C                             | 4.71857500  | 1.14665200  | -0.73063000 |
| C                             | 4.36117700  | 1.11101600  | 0.65562700  | C                             | 4.35910600  | 1.09389600  | 0.65143700  |
| Si                            | 3.35653700  | -0.49203400 | 1.27477000  | Si                            | 3.36337400  | -0.51181900 | 1.26983900  |

**C<sub>19</sub>Si-N<sub>2</sub>**

|                               |             |             |             |                               |             |             |             |
|-------------------------------|-------------|-------------|-------------|-------------------------------|-------------|-------------|-------------|
| $F = 0.005$                   |             |             |             | $F = 0.005$                   |             |             |             |
| $E_{ads}(BSSE) = -0.05377844$ |             |             |             | $E_{ads}(BSSE) = -0.05636742$ |             |             |             |
| N                             | -1.32195000 | 0.90194600  | -1.47271000 | N                             | -1.32775300 | 0.87494400  | -1.48440400 |
| N                             | -0.24969700 | 0.68184500  | -1.34816100 | N                             | -0.26102300 | 0.69182300  | -1.33755900 |
| C                             | 5.88013300  | -1.17120100 | 1.15892300  | C                             | 5.87753900  | -1.17285600 | 1.15726300  |
| C                             | 4.50333900  | -1.61059600 | 1.38401100  | C                             | 4.50047800  | -1.60921400 | 1.38135500  |
| C                             | 5.94130000  | 0.18757900  | 1.55051900  | C                             | 5.94146100  | 0.18415600  | 1.54941700  |
| C                             | 4.60081900  | 0.55256000  | 2.00702900  | C                             | 4.60243600  | 0.55176600  | 2.00550600  |
| C                             | 3.72850600  | -0.58160900 | 2.00679000  | C                             | 3.72876900  | -0.57947400 | 2.00342600  |
| C                             | 6.26392400  | 0.94625300  | 0.37652100  | C                             | 6.26668400  | 0.94435500  | 0.37902200  |
| C                             | 5.16044200  | 1.83067900  | 0.13207200  | C                             | 5.16480600  | 1.82800900  | 0.13333500  |

|    |            |             |             |    |            |             |             |
|----|------------|-------------|-------------|----|------------|-------------|-------------|
| C  | 4.11217900 | 1.57910400  | 1.11955900  | C  | 4.11692200 | 1.57815200  | 1.12011300  |
| C  | 6.54967000 | 0.09192600  | -0.77122000 | C  | 6.54657900 | 0.08867700  | -0.76864500 |
| C  | 5.40575600 | 0.39069700  | -1.63105800 | C  | 5.40619300 | 0.39122800  | -1.63154500 |
| C  | 4.62203300 | 1.47993500  | -1.12699600 | C  | 4.62656100 | 1.47988000  | -1.12479100 |
| C  | 6.16716300 | -1.21456800 | -0.24570700 | C  | 6.16520600 | -1.21867200 | -0.24551600 |
| C  | 5.00025800 | -1.73912700 | -0.89591600 | C  | 4.99732200 | -1.73661200 | -0.89598500 |
| C  | 4.52283400 | -0.73066500 | -1.76347800 | C  | 4.52282300 | -0.72784600 | -1.76216500 |
| C  | 3.95299800 | -1.96446500 | 0.09909600  | C  | 3.95056700 | -1.96044100 | 0.09833500  |
| C  | 2.78476800 | -1.19110400 | -0.19406200 | C  | 2.78590100 | -1.18392200 | -0.19386200 |
| C  | 3.19076400 | -0.35925300 | -1.28497100 | C  | 3.19241700 | -0.35363000 | -1.28383000 |
| C  | 3.25284100 | 1.02280200  | -0.88693500 | C  | 3.25728100 | 1.02533600  | -0.88559200 |
| C  | 2.89139800 | 1.17856000  | 0.48864400  | C  | 2.89716600 | 1.17987500  | 0.48893100  |
| Si | 1.86706300 | -0.30530100 | 1.33691800  | Si | 1.86820500 | -0.29953500 | 1.33605800  |

**C<sub>19</sub>Si-CO**

| $F = 0.010$<br>$E_{ads}(BSSE) = -1.26088602$ | $F = 0.010$<br>$E_{ads}(BSSE) = -1.32802545$ |
|----------------------------------------------|----------------------------------------------|
| O 1.94882700 -0.02443100 -0.01647800         | O 1.95599700 -0.02593500 0.00455300          |
| C 3.06987600 -0.01053700 0.01228300          | C 3.06579600 -0.00796000 0.02853600          |
| C 8.19175900 -1.38011600 1.30854900          | C 8.20031700 -1.37791900 1.28911100          |
| C 6.84930400 -1.67015400 0.93821400          | C 6.85759600 -1.68726600 0.93584500          |
| C 8.19355300 -0.08778500 1.87785400          | C 8.19800000 -0.09123100 1.86040500          |
| C 6.81899100 0.39648800 1.83676100           | C 6.81523700 0.39754900 1.83441500           |
| C 5.91834300 -0.66014200 1.55065900          | C 5.93264200 -0.64483900 1.52640400          |
| C 9.00590600 0.72430900 0.99745100           | C 9.00102900 0.72542200 0.99538700           |
| C 8.20209900 1.79249400 0.48630100           | C 8.19148200 1.79727700 0.48933100           |
| C 6.81724400 1.60983800 0.95359200           | C 6.81093800 1.61489200 0.95043000           |
| C 9.62699800 -0.02463100 -0.05436000         | C 9.62476600 -0.03298600 -0.05197800         |
| C 9.16432800 0.55302700 -1.32861100          | C 9.12110600 0.53315200 -1.29224600          |
| C 8.20275900 1.62550100 -0.91187800          | C 8.18988200 1.65274900 -0.91094000          |
| C 9.08893600 -1.34990100 0.10571700          | C 9.12832100 -1.39068700 0.10399600          |
| C 8.24847100 -1.60132100 -0.99556400         | C 8.25677500 -1.59832200 -0.97963600         |
| C 8.25347500 -0.41959900 -1.80615000         | C 8.25293100 -0.43683200 -1.82329300         |
| C 6.86024400 -1.77390200 -0.50648600         | C 6.86821400 -1.77896900 -0.49553200         |
| C 5.99643700 -0.88098700 -1.20052600         | C 6.00546400 -0.87173500 -1.19045100         |
| C 6.85913000 0.08081000 -1.85112200          | C 6.86201000 0.07348500 -1.84059500          |
| C 6.84711700 1.40385100 -1.32181300          | C 6.84696900 1.40607600 -1.30994600          |
| C 5.93738600 1.61686400 -0.13362000          | C 5.92457000 1.64093000 -0.13304500          |
| Si 5.08628500 0.02922400 0.09809200          | Si 5.07742800 0.05205000 0.08665200          |

**C<sub>19</sub>Si-CO<sub>2</sub>**

| $F = 0.010$                   |             |             |             | $F = 0.010$                   |             |             |             |
|-------------------------------|-------------|-------------|-------------|-------------------------------|-------------|-------------|-------------|
| $E_{ads}(BSSE) = -0.10993079$ |             |             |             | $E_{ads}(BSSE) = -0.12354919$ |             |             |             |
| C                             | 0.27117300  | 0.53068500  | -0.95472800 | C                             | 0.28395900  | 0.61706600  | -0.93352700 |
| O                             | -0.88470100 | 0.52655700  | -0.91370700 | O                             | -0.85715100 | 0.73365700  | -0.93228800 |
| O                             | 1.44377200  | 0.53612200  | -0.99831000 | O                             | 1.44542800  | 0.50391400  | -0.93712200 |
| C                             | 7.45390500  | -1.25189700 | 0.93438500  | C                             | 7.48386300  | -1.21288500 | 0.94499900  |
| C                             | 6.10211900  | -1.77145700 | 1.14691700  | C                             | 6.14778100  | -1.77209700 | 1.15557200  |
| C                             | 7.48689800  | 0.04081800  | 1.51837000  | C                             | 7.47363100  | 0.08364800  | 1.51862000  |
| C                             | 6.15433800  | 0.28143300  | 2.07391500  | C                             | 6.13216300  | 0.28635200  | 2.06660400  |
| C                             | 5.31829200  | -0.87268000 | 1.93877200  | C                             | 5.33390300  | -0.89310300 | 1.93656900  |
| C                             | 7.72905600  | 0.97175600  | 0.45562400  | C                             | 7.69262000  | 1.01565000  | 0.45391100  |
| C                             | 6.58534100  | 1.83672100  | 0.38478000  | C                             | 6.52141800  | 1.83924500  | 0.36891700  |
| C                             | 5.59105800  | 1.40158100  | 1.36490100  | C                             | 5.53840900  | 1.38105400  | 1.34815700  |

|    |            |             |             |    |            |             |             |
|----|------------|-------------|-------------|----|------------|-------------|-------------|
| C  | 7.99665500 | 0.30411200  | -0.81758500 | C  | 7.98140000 | 0.34451800  | -0.81301700 |
| C  | 6.79865600 | 0.67832200  | -1.57953300 | C  | 6.77801000 | 0.67724000  | -1.58655500 |
| C  | 6.00285600 | 1.64717300  | -0.88922900 | C  | 5.95177200 | 1.62411800  | -0.90486400 |
| C  | 7.67711300 | -1.08038200 | -0.47093900 | C  | 7.70854900 | -1.04817400 | -0.45937300 |
| C  | 6.49959400 | -1.55022000 | -1.14435100 | C  | 6.54759800 | -1.55483300 | -1.13275000 |
| C  | 5.94996400 | -0.44600500 | -1.83418400 | C  | 5.96811000 | -0.47479700 | -1.83334400 |
| C  | 5.50581000 | -1.95613100 | -0.15089300 | C  | 5.56427300 | -1.98389700 | -0.14094900 |
| C  | 4.29853600 | -1.19501400 | -0.27727200 | C  | 4.33611800 | -1.26004800 | -0.27711700 |
| C  | 4.62610500 | -0.20117800 | -1.25434700 | C  | 4.63560800 | -0.26611400 | -1.26084600 |
| C  | 4.65925600 | 1.10615300  | -0.66415800 | C  | 4.62575500 | 1.04274700  | -0.68175100 |
| C  | 4.35561400 | 1.04371300  | 0.73338400  | C  | 4.31937100 | 0.97958900  | 0.71414300  |
| Si | 3.40645100 | -0.58043300 | 1.39850900  | Si | 3.41527400 | -0.66310000 | 1.38633500  |

**C<sub>19</sub>Si-N<sub>2</sub>**

| $F = 0.010$<br>$E_{ads}(BSSE) = -0.07166555$ |             |             |             | $F = 0.010$<br>$E_{ads}(BSSE) = -0.07659200$ |             |             |             |
|----------------------------------------------|-------------|-------------|-------------|----------------------------------------------|-------------|-------------|-------------|
| N                                            | -1.26616900 | 0.80685300  | -1.54125200 | N                                            | -1.26724600 | 0.80628400  | -1.52147400 |
| N                                            | -0.20408800 | 0.65325200  | -1.29151400 | N                                            | -0.21188800 | 0.65604400  | -1.28266800 |
| C                                            | 5.87099400  | -1.18491500 | 1.14733100  | C                                            | 5.86792600  | -1.18344900 | 1.14908200  |
| C                                            | 4.48883800  | -1.60970000 | 1.37624500  | C                                            | 4.48560300  | -1.60788500 | 1.37378700  |
| C                                            | 5.94846900  | 0.17372300  | 1.54606300  | C                                            | 5.94400900  | 0.17427200  | 1.54699000  |
| C                                            | 4.61179600  | 0.54954700  | 2.00889200  | C                                            | 4.60650100  | 0.55021500  | 2.00535800  |
| C                                            | 3.72441200  | -0.57402800 | 2.00258300  | C                                            | 3.72027400  | -0.57245800 | 1.99629300  |
| C                                            | 6.27207400  | 0.93394900  | 0.37427300  | C                                            | 6.27229400  | 0.93592600  | 0.37927000  |
| C                                            | 5.17606000  | 1.82984700  | 0.13798900  | C                                            | 5.17559200  | 1.82736800  | 0.13722200  |
| C                                            | 4.12914300  | 1.58240700  | 1.12893800  | C                                            | 4.12710800  | 1.58052200  | 1.12500800  |
| C                                            | 6.54947100  | 0.08196500  | -0.78157400 | C                                            | 6.54791400  | 0.08117700  | -0.77499700 |
| C                                            | 5.39750000  | 0.39694400  | -1.63534900 | C                                            | 5.40108000  | 0.39665700  | -1.63624300 |
| C                                            | 4.62793800  | 1.48854800  | -1.12001000 | C                                            | 4.63198700  | 1.48627200  | -1.12105600 |
| C                                            | 6.15028000  | -1.22450400 | -0.25784000 | C                                            | 6.15208900  | -1.22723300 | -0.25338300 |
| C                                            | 4.97441000  | -1.73196500 | -0.90523200 | C                                            | 4.97745900  | -1.73033400 | -0.90347800 |
| C                                            | 4.50342500  | -0.71365800 | -1.76484800 | C                                            | 4.50958200  | -0.71392200 | -1.76439100 |
| C                                            | 3.92878300  | -1.94962500 | 0.09438100  | C                                            | 3.93030200  | -1.94772000 | 0.09293800  |
| C                                            | 2.76599100  | -1.16061500 | -0.18522700 | C                                            | 2.77008900  | -1.15810900 | -0.18952300 |
| C                                            | 3.17510100  | -0.33100100 | -1.27800200 | C                                            | 3.18071400  | -0.33069800 | -1.28171400 |
| C                                            | 3.25299200  | 1.04447600  | -0.87518000 | C                                            | 3.25719600  | 1.04181900  | -0.88025900 |
| C                                            | 2.89994600  | 1.19256700  | 0.50442100  | C                                            | 2.90140900  | 1.18907000  | 0.49736100  |
| Si                                           | 1.84917300  | -0.27807000 | 1.35378100  | Si                                           | 1.84654500  | -0.27782100 | 1.34474600  |

**C<sub>19</sub>Si-CO**

| $F = 0.015$<br>$E_{ads}(BSSE) = -1.60888130$ |            |             |             | $F = 0.015$<br>$E_{ads}(BSSE) = -1.69386335$ |            |             |             |
|----------------------------------------------|------------|-------------|-------------|----------------------------------------------|------------|-------------|-------------|
| O                                            | 1.91954500 | -0.01286000 | 0.00018700  | O                                            | 1.92700900 | -0.02083000 | 0.01198100  |
| C                                            | 3.03892700 | -0.00811300 | 0.02064100  | C                                            | 3.03498500 | -0.00583200 | 0.03150900  |
| C                                            | 8.19503700 | -1.37817300 | 1.32130700  | C                                            | 8.20964800 | -1.37828400 | 1.28856400  |
| C                                            | 6.84495900 | -1.64676800 | 0.93330700  | C                                            | 6.86551100 | -1.68339400 | 0.93183200  |
| C                                            | 8.19605300 | -0.08275000 | 1.89186100  | C                                            | 8.20193300 | -0.09072500 | 1.85864400  |
| C                                            | 6.82490500 | 0.39398500  | 1.83331000  | C                                            | 6.81212400 | 0.39537100  | 1.83313000  |
| C                                            | 5.91599800 | -0.67108000 | 1.54832400  | C                                            | 5.93809100 | -0.64139400 | 1.51459000  |
| C                                            | 9.01740200 | 0.73367900  | 1.00970500  | C                                            | 9.00311700 | 0.72951000  | 1.00052600  |
| C                                            | 8.21823300 | 1.79172200  | 0.48731600  | C                                            | 8.19481500 | 1.79636200  | 0.48959700  |
| C                                            | 6.82533700 | 1.60084500  | 0.95432500  | C                                            | 6.80757500 | 1.61446200  | 0.94778500  |
| C                                            | 9.64121500 | -0.01069500 | -0.04652800 | C                                            | 9.63446900 | -0.03216500 | -0.05092500 |
| C                                            | 9.20335100 | 0.57381000  | -1.34913000 | C                                            | 9.12890900 | 0.53314500  | -1.29107400 |

|    |            |             |             |    |            |             |             |
|----|------------|-------------|-------------|----|------------|-------------|-------------|
| C  | 8.22717400 | 1.60400200  | -0.90927800 | C  | 8.19825800 | 1.65406200  | -0.91137400 |
| C  | 9.05788000 | -1.30813100 | 0.11235300  | C  | 9.13946600 | -1.39234300 | 0.10429300  |
| C  | 8.24046500 | -1.59401200 | -1.00789200 | C  | 8.26071900 | -1.59656800 | -0.98148800 |
| C  | 8.25274400 | -0.40926800 | -1.79399400 | C  | 8.25642300 | -0.44013600 | -1.82318500 |
| C  | 6.84883700 | -1.77162000 | -0.52237300 | C  | 6.87162900 | -1.78035200 | -0.49711800 |
| C  | 5.98790200 | -0.89156800 | -1.20973200 | C  | 6.01053200 | -0.86548800 | -1.18168700 |
| C  | 6.86054300 | 0.07822900  | -1.86772600 | C  | 6.86493800 | 0.07166000  | -1.84192900 |
| C  | 6.85729300 | 1.38530400  | -1.32343800 | C  | 6.85425400 | 1.40078200  | -1.30627300 |
| C  | 5.95950800 | 1.57230800  | -0.13712400 | C  | 5.92879900 | 1.63050600  | -0.13347500 |
| Si | 5.05415900 | 0.00005400  | 0.09344200  | Si | 5.04426400 | 0.05055200  | 0.08348300  |

**C<sub>19</sub>Si-CO<sub>2</sub>**

|                                              |             |             |             |                                              |             |             |             |
|----------------------------------------------|-------------|-------------|-------------|----------------------------------------------|-------------|-------------|-------------|
| $F = 0.015$<br>$E_{ads}(BSSE) = -0.16062570$ |             |             |             | $F = 0.015$<br>$E_{ads}(BSSE) = -0.19373070$ |             |             |             |
| C                                            | 0.29735800  | 0.52793600  | -0.91562600 | C                                            | -4.83873800 | -0.41781100 | 0.00001900  |
| O                                            | -0.85237700 | 0.58457000  | -0.98263000 | O                                            | -5.98104900 | -0.38178600 | -0.00014700 |
| O                                            | 1.47263100  | 0.47367500  | -0.85278800 | O                                            | -3.66661500 | -0.45570500 | 0.00018600  |
| C                                            | 7.44603000  | -1.23526300 | 0.96595600  | C                                            | 2.60731400  | 0.93744500  | 0.71089600  |
| C                                            | 6.08790300  | -1.73200400 | 1.20336900  | C                                            | 1.33686100  | 1.53737500  | 1.12564600  |
| C                                            | 7.49373900  | 0.08119700  | 1.50145100  | C                                            | 2.60712900  | 0.93722100  | -0.71160500 |
| C                                            | 6.16308400  | 0.35399500  | 2.05098300  | C                                            | 1.33657600  | 1.53702900  | -1.12622800 |
| C                                            | 5.31186500  | -0.79458100 | 1.95900500  | C                                            | 0.58494000  | 2.00027200  | -0.00026800 |
| C                                            | 7.73809500  | 0.96798300  | 0.40305500  | C                                            | 2.63587600  | -0.43164600 | -1.12937400 |
| C                                            | 6.60051300  | 1.83880300  | 0.30284500  | C                                            | 1.42097100  | -0.67737900 | -1.85422500 |
| C                                            | 5.60608300  | 1.44814500  | 1.30224400  | C                                            | 0.59829600  | 0.52977900  | -1.83621500 |
| C                                            | 8.00034400  | 0.25018400  | -0.84844100 | C                                            | 2.79388300  | -1.35075700 | -0.00002600 |
| C                                            | 6.79415700  | 0.60657100  | -1.61951900 | C                                            | 1.47760400  | -2.02002800 | 0.00024000  |
| C                                            | 6.01061600  | 1.60400000  | -0.96045500 | C                                            | 0.70262400  | -1.66260400 | -1.14361100 |
| C                                            | 7.66338900  | -1.11926000 | -0.44490700 | C                                            | 2.63615600  | -0.43130000 | 1.12907200  |
| C                                            | 6.47718300  | -1.60109200 | -1.09469400 | C                                            | 1.42143100  | -0.67681400 | 1.85431200  |
| C                                            | 5.93470400  | -0.51785100 | -1.82230400 | C                                            | 0.70290600  | -1.66225800 | 1.14416900  |
| C                                            | 5.48362100  | -1.95792200 | -0.08146300 | C                                            | 0.59875800  | 0.53034100  | 1.83613100  |
| C                                            | 4.28047100  | -1.18999700 | -0.22720900 | C                                            | -0.67325200 | 0.29204400  | 1.21880100  |
| C                                            | 4.61266800  | -0.23952100 | -1.24698200 | C                                            | -0.55655900 | -1.04227900 | 0.71338200  |
| C                                            | 4.66010400  | 1.08502200  | -0.70909400 | C                                            | -0.55673700 | -1.04249800 | -0.71270400 |
| C                                            | 4.36239000  | 1.07373700  | 0.69242200  | C                                            | -0.67356400 | 0.29166700  | -1.21851600 |
| Si                                           | 3.38329300  | -0.50857900 | 1.42510900  | Si                                           | -1.41382400 | 1.68808100  | 0.00002100  |

**C<sub>19</sub>Si-N<sub>2</sub>**

|                                              |             |             |             |                                              |             |             |             |
|----------------------------------------------|-------------|-------------|-------------|----------------------------------------------|-------------|-------------|-------------|
| $F = 0.015$<br>$E_{ads}(BSSE) = -0.09723814$ |             |             |             | $F = 0.015$<br>$E_{ads}(BSSE) = -0.11392979$ |             |             |             |
| N                                            | -1.26164500 | 0.75148800  | -1.46851600 | N                                            | -5.31090100 | -0.74408500 | 0.00023300  |
| N                                            | -0.19483500 | 0.62199700  | -1.22398300 | N                                            | -4.22618000 | -0.61162400 | -0.00024700 |
| C                                            | 5.85253300  | -1.19301800 | 1.15460500  | C                                            | 2.27950300  | 0.97444900  | 0.71209100  |
| C                                            | 4.46224100  | -1.60549000 | 1.36629200  | C                                            | 0.99749500  | 1.54849700  | 1.12720400  |
| C                                            | 5.93638800  | 0.16728500  | 1.55653700  | C                                            | 2.28007100  | 0.97522900  | -0.70973900 |
| C                                            | 4.59473000  | 0.55205900  | 2.00207700  | C                                            | 0.99838300  | 1.54971900  | -1.12522800 |
| C                                            | 3.69509000  | -0.56292200 | 1.97988400  | C                                            | 0.23716600  | 1.99650200  | 0.00093200  |
| C                                            | 6.27868000  | 0.92529100  | 0.38962100  | C                                            | 2.33711100  | -0.39263000 | -1.12857900 |
| C                                            | 5.19108100  | 1.82830600  | 0.13998700  | C                                            | 1.12840500  | -0.66217300 | -1.85451700 |
| C                                            | 4.12992500  | 1.58606400  | 1.11791100  | C                                            | 0.28163000  | 0.52826900  | -1.83667900 |
| C                                            | 6.57000500  | 0.07168500  | -0.76703000 | C                                            | 2.51354500  | -1.30937500 | 0.00002600  |
| C                                            | 5.42242800  | 0.39662600  | -1.63453900 | C                                            | 1.21093300  | -2.00472700 | -0.00086300 |
| C                                            | 4.65524500  | 1.49013800  | -1.12461900 | C                                            | 0.42961800  | -1.66250600 | -1.14514800 |

|    |            |             |             |    |             |             |             |
|----|------------|-------------|-------------|----|-------------|-------------|-------------|
| C  | 6.14763000 | -1.23385400 | -0.24611000 | C  | 2.33622600  | -0.39385700 | 1.12950000  |
| C  | 4.97433800 | -1.72914800 | -0.90762200 | C  | 1.12695100  | -0.66418400 | 1.85417700  |
| C  | 4.52171200 | -0.70582600 | -1.77107200 | C  | 0.42872400  | -1.66374400 | 1.14318900  |
| C  | 3.91455700 | -1.93786200 | 0.08011400  | C  | 0.28018200  | 0.52627800  | 1.83697700  |
| C  | 2.75939800 | -1.13772800 | -0.20840400 | C  | -0.98585400 | 0.26279500  | 1.21814700  |
| C  | 3.18788000 | -0.31350800 | -1.29981200 | C  | -0.84213700 | -1.06860500 | 0.71223000  |
| C  | 3.27142200 | 1.05695300  | -0.89638600 | C  | -0.84158500 | -1.06783600 | -0.71453600 |
| C  | 2.90314200 | 1.20176400  | 0.48099300  | C  | -0.98488900 | 0.26411600  | -1.21910800 |
| Si | 1.81459600 | -0.25430100 | 1.31894100  | Si | -1.75066400 | 1.64804700  | -0.00002600 |

**C<sub>19</sub>Si-CO**

| $F = 0.020$<br>$E_{ads}(BSSE) = -1.98886525$ |            |             |             | $F = 0.020$<br>$E_{ads}(BSSE) = -2.10539484$ |            |             |             |
|----------------------------------------------|------------|-------------|-------------|----------------------------------------------|------------|-------------|-------------|
| O                                            | 1.88954200 | 0.00012800  | 0.02114300  | O                                            | 1.90102200 | -0.01104400 | 0.02234300  |
| C                                            | 3.00771700 | -0.00457200 | 0.02868300  | C                                            | 3.00793500 | -0.00078600 | 0.03536300  |
| C                                            | 8.19856400 | -1.37220000 | 1.32653600  | C                                            | 8.22171000 | -1.37766500 | 1.28255300  |
| C                                            | 6.83366300 | -1.62894600 | 0.93039200  | C                                            | 6.87463900 | -1.68403200 | 0.92637900  |
| C                                            | 8.20196000 | -0.07674400 | 1.90312500  | C                                            | 8.20635100 | -0.09068500 | 1.85205500  |
| C                                            | 6.83746600 | 0.39577700  | 1.83171400  | C                                            | 6.80859700 | 0.39445000  | 1.83100000  |
| C                                            | 5.91816200 | -0.68091400 | 1.53482200  | C                                            | 5.94628100 | -0.63607100 | 1.49511900  |
| C                                            | 9.03638600 | 0.74858300  | 1.02295600  | C                                            | 9.00633800 | 0.73558300  | 1.00593700  |
| C                                            | 8.23680900 | 1.79890100  | 0.49317200  | C                                            | 8.19516900 | 1.79763900  | 0.49069500  |
| C                                            | 6.83940000 | 1.58790000  | 0.95628300  | C                                            | 6.80272300 | 1.61347900  | 0.94356100  |
| C                                            | 9.65750300 | 0.00516800  | -0.03393400 | C                                            | 9.64581900 | -0.03098600 | -0.04797100 |
| C                                            | 9.22829800 | 0.59456400  | -1.35402000 | C                                            | 9.12431300 | 0.53008700  | -1.27813500 |
| C                                            | 8.25093200 | 1.59378000  | -0.90349100 | C                                            | 8.20353100 | 1.66232100  | -0.91174500 |
| C                                            | 9.03338200 | -1.27578200 | 0.12173900  | C                                            | 9.16420600 | -1.40606400 | 0.10654800  |
| C                                            | 8.22934200 | -1.57939500 | -1.01099100 | C                                            | 8.26644300 | -1.59247700 | -0.97692300 |
| C                                            | 8.24730500 | -0.40253400 | -1.79178800 | C                                            | 8.25874200 | -0.44704500 | -1.82490500 |
| C                                            | 6.83214900 | -1.77373200 | -0.53944600 | C                                            | 6.87694500 | -1.78517800 | -0.49707200 |
| C                                            | 5.97629200 | -0.90933400 | -1.22594800 | C                                            | 6.01505600 | -0.86146700 | -1.17556100 |
| C                                            | 6.86395700 | 0.07006000  | -1.89047700 | C                                            | 6.86604600 | 0.06631300  | -1.84223600 |
| C                                            | 6.86713200 | 1.36014000  | -1.31818000 | C                                            | 6.85838200 | 1.39378700  | -1.29808400 |
| C                                            | 5.98082000 | 1.52679900  | -0.14236600 | C                                            | 5.92711300 | 1.62630800  | -0.13635200 |
| Si                                           | 5.02068600 | -0.02874600 | 0.07893700  | Si                                           | 5.01010800 | 0.05243600  | 0.07483300  |

**C<sub>19</sub>Si-CO<sub>2</sub>**

| $F = 0.020$<br>$E_{ads}(BSSE) = -0.23431939$ |             |             |             | $E_{ele} = 0.020$<br>$E_{ads}(BSSE) = -0.27245444$ |             |             |             |
|----------------------------------------------|-------------|-------------|-------------|----------------------------------------------------|-------------|-------------|-------------|
| C                                            | 0.32322500  | 0.49300400  | -0.83982400 | C                                                  | 0.33691300  | 0.49228500  | -0.83160700 |
| O                                            | -0.82158300 | 0.55334000  | -0.92393000 | O                                                  | -0.79530900 | 0.56174200  | -0.93425400 |
| O                                            | 1.50299400  | 0.43517800  | -0.76015000 | O                                                  | 1.51025000  | 0.42470900  | -0.73249100 |
| C                                            | 7.41995500  | -1.24375000 | 0.98093600  | C                                                  | 7.41748500  | -1.24178200 | 0.97985100  |
| C                                            | 6.05023300  | -1.72600300 | 1.19295000  | C                                                  | 6.04740300  | -1.72423300 | 1.19081300  |
| C                                            | 7.46952500  | 0.07549700  | 1.51841900  | C                                                  | 7.46553800  | 0.07713800  | 1.51671300  |
| C                                            | 6.12785900  | 0.35845300  | 2.04098600  | C                                                  | 6.12284700  | 0.35902200  | 2.03773400  |
| C                                            | 5.26409500  | -0.78029600 | 1.92956000  | C                                                  | 5.26113100  | -0.77959400 | 1.92606900  |
| C                                            | 7.74082000  | 0.95898500  | 0.42511200  | C                                                  | 7.74047800  | 0.96407600  | 0.42907300  |
| C                                            | 6.61066000  | 1.83732400  | 0.30200200  | C                                                  | 6.60553800  | 1.83425200  | 0.30013300  |
| C                                            | 5.59336500  | 1.45315800  | 1.28180600  | C                                                  | 5.58947800  | 1.45034700  | 1.27924300  |
| C                                            | 8.02837400  | 0.23869000  | -0.82561800 | C                                                  | 8.02154800  | 0.23871700  | -0.82204000 |
| C                                            | 6.83073200  | 0.60557000  | -1.61949300 | C                                                  | 6.82707900  | 0.60740900  | -1.62406100 |
| C                                            | 6.04317600  | 1.60527800  | -0.97230300 | C                                                  | 6.04116100  | 1.60391900  | -0.97410900 |
| C                                            | 7.66388900  | -1.13027400 | -0.42450700 | C                                                  | 7.66490800  | -1.13476300 | -0.42383100 |

|    |            |             |             |    |            |             |             |
|----|------------|-------------|-------------|----|------------|-------------|-------------|
| C  | 6.48356400 | -1.59896000 | -1.09544500 | C  | 6.48192900 | -1.59584800 | -1.09384000 |
| C  | 5.96517800 | -0.51046100 | -1.83247900 | C  | 5.96513700 | -0.50989300 | -1.83272000 |
| C  | 5.46725300 | -1.94446600 | -0.09981100 | C  | 5.46696400 | -1.94229200 | -0.09933200 |
| C  | 4.27096300 | -1.16510600 | -0.26438700 | C  | 4.27201900 | -1.16084000 | -0.26348000 |
| C  | 4.63142700 | -0.22072000 | -1.28307900 | C  | 4.63122600 | -0.21943000 | -1.28480900 |
| C  | 4.68030500 | 1.09939200  | -0.74656200 | C  | 4.67866400 | 1.09646400  | -0.75037600 |
| C  | 4.35507800 | 1.08572800  | 0.65089300  | C  | 4.35337800 | 1.07910500  | 0.64656500  |
| Si | 3.32678100 | -0.47981300 | 1.36525200  | Si | 3.32210000 | -0.48076100 | 1.36108300  |

**C<sub>19</sub>Si-N<sub>2</sub>**

|                                              |             |             |             |                                              |             |             |             |
|----------------------------------------------|-------------|-------------|-------------|----------------------------------------------|-------------|-------------|-------------|
| $F = 0.020$<br>$E_{ads}(BSSE) = -0.13186518$ |             |             |             | $F = 0.020$<br>$E_{ads}(BSSE) = -0.14614638$ |             |             |             |
| N                                            | -1.27155400 | 0.70522700  | -1.37834600 | N                                            | -1.20947700 | 0.71534600  | -1.37477400 |
| N                                            | -0.20053500 | 0.58927700  | -1.14355600 | N                                            | -0.15333000 | 0.58537200  | -1.12337000 |
| C                                            | 5.83284100  | -1.20001400 | 1.16501000  | C                                            | 5.83016800  | -1.19641300 | 1.16224000  |
| C                                            | 4.43393100  | -1.60039900 | 1.35539000  | C                                            | 4.43188700  | -1.59891700 | 1.35357100  |
| C                                            | 5.92124400  | 0.16233300  | 1.56974100  | C                                            | 5.91573500  | 0.16571300  | 1.56577400  |
| C                                            | 4.57286200  | 0.55546900  | 1.99328700  | C                                            | 4.56666600  | 0.55608500  | 1.98972100  |
| C                                            | 3.66160000  | -0.55112500 | 1.95335200  | C                                            | 3.65877300  | -0.55162200 | 1.95092900  |
| C                                            | 6.28564200  | 0.91738200  | 0.40870900  | C                                            | 6.28109800  | 0.92487500  | 0.40954800  |
| C                                            | 5.20644700  | 1.82627500  | 0.14172100  | C                                            | 5.19575100  | 1.82392800  | 0.13874400  |
| C                                            | 4.12812100  | 1.58924800  | 1.10312300  | C                                            | 4.12017600  | 1.58571900  | 1.10093500  |
| C                                            | 6.59653000  | 0.06127500  | -0.74769400 | C                                            | 6.58505900  | 0.06417300  | -0.74738800 |
| C                                            | 5.45502200  | 0.39501200  | -1.63258000 | C                                            | 5.44534000  | 0.39690300  | -1.63870300 |
| C                                            | 4.68739300  | 1.48987800  | -1.13084700 | C                                            | 4.67827800  | 1.48771300  | -1.13284000 |
| C                                            | 6.14850300  | -1.24333300 | -0.22983200 | C                                            | 6.14694000  | -1.24596700 | -0.23041800 |
| C                                            | 4.97979500  | -1.72690000 | -0.90849100 | C                                            | 4.97598900  | -1.72392000 | -0.90739200 |
| C                                            | 4.54819200  | -0.69964500 | -1.77773800 | C                                            | 4.54310900  | -0.70001300 | -1.77738100 |
| C                                            | 3.90286200  | -1.92628800 | 0.06396600  | C                                            | 3.90190800  | -1.92534500 | 0.06569200  |
| C                                            | 2.75528700  | -1.11620100 | -0.23800600 | C                                            | 2.75413500  | -1.11534300 | -0.23476500 |
| C                                            | 3.20712700  | -0.29810200 | -1.32712300 | C                                            | 3.20212400  | -0.29971300 | -1.32666900 |
| C                                            | 3.29423800  | 1.06754400  | -0.92375000 | C                                            | 3.28645100  | 1.06198400  | -0.92546000 |
| C                                            | 2.90546400  | 1.20979900  | 0.45006600  | C                                            | 2.89920800  | 1.20099800  | 0.44854700  |
| Si                                           | 1.77552900  | -0.23071300 | 1.27246600  | Si                                           | 1.77055200  | -0.23555800 | 1.27232700  |

**C<sub>19</sub>Si-CO**

|                                              |            |             |             |                                              |            |             |             |
|----------------------------------------------|------------|-------------|-------------|----------------------------------------------|------------|-------------|-------------|
| $F = 0.025$<br>$E_{ads}(BSSE) = -2.40028075$ |            |             |             | $F = 0.025$<br>$E_{ads}(BSSE) = -2.57870530$ |            |             |             |
| O                                            | 1.85816900 | -0.00376100 | 0.03338800  | O                                            | 1.86113700 | -0.01874700 | 0.06004300  |
| C                                            | 2.97544400 | -0.00582500 | 0.03322200  | C                                            | 2.96684000 | -0.00883200 | 0.05139700  |
| C                                            | 8.20407300 | -1.37330600 | 1.32777100  | C                                            | 8.21102200 | -1.38099200 | 1.31912800  |
| C                                            | 6.83386500 | -1.62468900 | 0.92907300  | C                                            | 6.85409900 | -1.63787900 | 0.92246500  |
| C                                            | 8.20779500 | -0.07616600 | 1.90537100  | C                                            | 8.20274900 | -0.08436100 | 1.87999800  |
| C                                            | 6.83909300 | 0.39478400  | 1.82816800  | C                                            | 6.81261200 | 0.38848900  | 1.82095100  |
| C                                            | 5.92277500 | -0.67575000 | 1.52215300  | C                                            | 5.92300900 | -0.65589800 | 1.51393200  |
| C                                            | 9.03887500 | 0.74625500  | 1.02363700  | C                                            | 9.02123800 | 0.73670900  | 1.02193000  |
| C                                            | 8.24130900 | 1.79873300  | 0.49187000  | C                                            | 8.21879100 | 1.78062900  | 0.48393000  |
| C                                            | 6.83997800 | 1.58729400  | 0.95370000  | C                                            | 6.81565900 | 1.60348500  | 0.94728200  |
| C                                            | 9.67552400 | 0.00323900  | -0.02800900 | C                                            | 9.66935000 | -0.01820000 | -0.03577300 |
| C                                            | 9.24468100 | 0.59704400  | -1.35841800 | C                                            | 9.22352100 | 0.56838400  | -1.34508400 |
| C                                            | 8.25895500 | 1.59186600  | -0.90288600 | C                                            | 8.24181200 | 1.61781800  | -0.91149900 |
| C                                            | 9.03374500 | -1.27279500 | 0.12461800  | C                                            | 9.07905100 | -1.31963200 | 0.11570600  |
| C                                            | 8.23214500 | -1.57741100 | -1.01143400 | C                                            | 8.25222200 | -1.58890500 | -1.00516400 |
| C                                            | 8.25384000 | -0.40200400 | -1.79048200 | C                                            | 8.26894100 | -0.41838400 | -1.80024000 |

|    |            |             |             |    |            |             |             |
|----|------------|-------------|-------------|----|------------|-------------|-------------|
| C  | 6.83091700 | -1.77198800 | -0.54169500 | C  | 6.85521800 | -1.77110600 | -0.52293800 |
| C  | 5.97926600 | -0.90390900 | -1.22108300 | C  | 6.00893400 | -0.86683800 | -1.18752200 |
| C  | 6.87098800 | 0.07009700  | -1.89119700 | C  | 6.88098900 | 0.07760300  | -1.86728400 |
| C  | 6.87451100 | 1.35810400  | -1.31824000 | C  | 6.88080700 | 1.38233300  | -1.32119100 |
| C  | 5.98541900 | 1.51652200  | -0.14376100 | C  | 5.96859500 | 1.55378800  | -0.14166200 |
| Si | 4.98610100 | -0.02743500 | 0.07309700  | Si | 4.97087100 | 0.00943600  | 0.07900000  |

**C<sub>19</sub>Si-CO<sub>2</sub>**

| $F = 0.025$<br>$E_{ads}(BSSE) = -0.33903162$ |             |             |             | $F = 0.025$<br>$E_{ads}(BSSE) = -0.40174203$ |             |             |             |
|----------------------------------------------|-------------|-------------|-------------|----------------------------------------------|-------------|-------------|-------------|
| C                                            | 0.31320300  | 0.45154600  | -0.73552100 | C                                            | 0.30768200  | 0.43695200  | -0.70366100 |
| O                                            | -0.82939200 | 0.50319000  | -0.80162800 | O                                            | -0.82237100 | 0.49545200  | -0.78429400 |
| O                                            | 1.50139000  | 0.40247400  | -0.67388700 | O                                            | 1.49178700  | 0.38007900  | -0.62617300 |
| C                                            | 7.38570500  | -1.25707400 | 1.00523500  | C                                            | 7.37581900  | -1.25673900 | 1.01137100  |
| C                                            | 6.00062500  | -1.71968700 | 1.17665200  | C                                            | 5.98717900  | -1.71439400 | 1.17441700  |
| C                                            | 7.43587700  | 0.06409200  | 1.54700600  | C                                            | 7.42591000  | 0.06483100  | 1.55050900  |
| C                                            | 6.07849200  | 0.36082800  | 2.02763300  | C                                            | 6.06530000  | 0.36615400  | 2.02117100  |
| C                                            | 5.20034200  | -0.76472400 | 1.88708600  | C                                            | 5.18643200  | -0.75627100 | 1.87668400  |
| C                                            | 7.74911600  | 0.94424400  | 0.46400500  | C                                            | 7.75471800  | 0.94714000  | 0.47642200  |
| C                                            | 6.63033800  | 1.83286000  | 0.30668600  | C                                            | 6.63311700  | 1.82803100  | 0.30245200  |
| C                                            | 5.57822700  | 1.45716400  | 1.25400600  | C                                            | 5.57495100  | 1.45799600  | 1.24267100  |
| C                                            | 8.07547000  | 0.22180000  | -0.78391600 | C                                            | 8.07910900  | 0.21436000  | -0.77058500 |
| C                                            | 6.89566800  | 0.60451800  | -1.61336900 | C                                            | 6.90929400  | 0.60306900  | -1.61923300 |
| C                                            | 6.09995100  | 1.60791400  | -0.98491000 | C                                            | 6.11469800  | 1.60593200  | -0.99297600 |
| C                                            | 7.67185900  | -1.14613300 | -0.39084700 | C                                            | 7.67601900  | -1.15865900 | -0.38053500 |
| C                                            | 6.50280600  | -1.59546600 | -1.09514000 | C                                            | 6.50502400  | -1.59320200 | -1.08969400 |
| C                                            | 6.02190200  | -0.49962200 | -1.84654500 | C                                            | 6.03598900  | -0.49973600 | -1.84930800 |
| C                                            | 5.45192600  | -1.92614300 | -0.12926400 | C                                            | 5.44839900  | -1.91887200 | -0.13114500 |
| C                                            | 4.26685400  | -1.13080300 | -0.32565400 | C                                            | 4.26881500  | -1.11547700 | -0.33601700 |
| C                                            | 4.67223700  | -0.19407100 | -1.33880500 | C                                            | 4.68376200  | -0.18672700 | -1.35406400 |
| C                                            | 4.72108800  | 1.12041400  | -0.80165300 | C                                            | 4.73267400  | 1.12323900  | -0.82152700 |
| C                                            | 4.35074700  | 1.10238900  | 0.58755500  | C                                            | 4.35244200  | 1.10188500  | 0.56580500  |
| Si                                           | 3.25343100  | -0.43996100 | 1.26560400  | Si                                           | 3.24111400  | -0.42529600 | 1.23803600  |

**C<sub>19</sub>Si-N<sub>2</sub>**

| $F = 0.025$<br>$E_{ads}(BSSE) = -0.17736559$ |             |             |             | $F = 0.025$<br>$E_{ads}(BSSE) = -0.20140237$ |             |             |             |
|----------------------------------------------|-------------|-------------|-------------|----------------------------------------------|-------------|-------------|-------------|
| N                                            | -1.33534300 | 0.66360200  | -1.26486100 | N                                            | -1.29172000 | 0.66420600  | -1.23049000 |
| N                                            | -0.25854600 | 0.55945800  | -1.04850900 | N                                            | -0.22750900 | 0.54873500  | -1.00363100 |
| C                                            | 5.81248000  | -1.20679300 | 1.18059600  | C                                            | 5.80378000  | -1.20446500 | 1.18191100  |
| C                                            | 4.40407900  | -1.59420200 | 1.34297900  | C                                            | 4.39421500  | -1.59196000 | 1.33867600  |
| C                                            | 5.90395000  | 0.15796300  | 1.58773100  | C                                            | 5.89234900  | 0.16007900  | 1.58782900  |
| C                                            | 4.54684800  | 0.56000700  | 1.98188700  | C                                            | 4.53304400  | 0.56175300  | 1.97606100  |
| C                                            | 3.62402200  | -0.53771600 | 1.92063500  | C                                            | 3.61227900  | -0.53568700 | 1.91087100  |
| C                                            | 6.29681400  | 0.90886600  | 0.43464400  | C                                            | 6.29568700  | 0.91614700  | 0.44407800  |
| C                                            | 5.22744400  | 1.82302900  | 0.14416300  | C                                            | 5.22106900  | 1.81891900  | 0.14215800  |
| C                                            | 4.12693600  | 1.59235200  | 1.08309200  | C                                            | 4.11802700  | 1.58939000  | 1.07597800  |
| C                                            | 6.63499500  | 0.04887000  | -0.71964200 | C                                            | 6.63066700  | 0.04861000  | -0.71065400 |
| C                                            | 5.50308000  | 0.39107200  | -1.62777100 | C                                            | 5.50577200  | 0.39223400  | -1.63346100 |
| C                                            | 4.73220500  | 1.48751100  | -1.13862500 | C                                            | 4.73469800  | 1.48525500  | -1.14303600 |
| C                                            | 6.15611600  | -1.25438900 | -0.20591400 | C                                            | 6.15685800  | -1.26187100 | -0.19965000 |
| C                                            | 4.99508100  | -1.72570500 | -0.90687300 | C                                            | 4.99489800  | -1.72216600 | -0.90455000 |
| C                                            | 4.59001200  | -0.69538600 | -1.78484900 | C                                            | 4.59588400  | -0.69501600 | -1.78680000 |
| C                                            | 3.89601700  | -1.91432400 | 0.04447400  | C                                            | 3.89364100  | -1.91081500 | 0.04160200  |

|    |            |             |             |    |            |             |             |
|----|------------|-------------|-------------|----|------------|-------------|-------------|
| C  | 2.75751300 | -1.09433800 | -0.27774300 | C  | 2.75808600 | -1.08738600 | -0.28542000 |
| C  | 3.23967800 | -0.28384600 | -1.36275300 | C  | 3.24398600 | -0.28178100 | -1.37307500 |
| C  | 3.32882600 | 1.07707100  | -0.96001700 | C  | 3.33052100 | 1.07440600  | -0.97270200 |
| C  | 2.91128600 | 1.21780100  | 0.40787900  | C  | 2.90687200 | 1.21074900  | 0.39408000  |
| Si | 1.73304800 | -0.20490300 | 1.20834800  | Si | 1.72343800 | -0.20333600 | 1.18909600  |

**Table S3.** Frontier orbital energies (in eV) for C<sub>20</sub> and C<sub>19</sub>Si fullerenes. Percentual increase of the HOMO-LUMO gap,  $\Delta E_{HL}$  is also shown.

| B3LYP/6-31G(d)               |        |        |          |                 |
|------------------------------|--------|--------|----------|-----------------|
|                              | $E_H$  | $E_L$  | $E_{HL}$ | $\Delta E_{HL}$ |
| C <sub>20</sub>              | -5.061 | -3.111 | 1.949    |                 |
| C <sub>19</sub> Si           | -5.610 | -3.295 | 2.316    | 18.81%          |
| B3LYP/6-311+G(d,p)           |        |        |          |                 |
|                              | $E_H$  | $E_L$  | $E_{HL}$ | $\Delta E_{HL}$ |
| C <sub>20</sub>              | -5.537 | -3.623 | 1.914    |                 |
| C <sub>19</sub> Si           | -5.924 | -3.050 | 2.219    | 15.92%          |
| B3LYP/def2TVZP               |        |        |          |                 |
|                              | $E_H$  | $E_L$  | $E_{HL}$ | $\Delta E_{HL}$ |
| C <sub>20</sub>              | -5.443 | -3.524 | 1.919    |                 |
| C <sub>19</sub> Si           | -5.821 | -3.615 | 2.206    | 14.96%          |
| $\omega$ B97XD/6-31G(d)      |        |        |          |                 |
|                              | $E_H$  | $E_L$  | $E_{HL}$ | $\Delta E_{HL}$ |
| C <sub>20</sub>              | -7.017 | -1.560 | 5.458    |                 |
| C <sub>19</sub> Si           | -7.537 | -1.731 | 5.805    | 6.37%           |
| $\omega$ B97XD /6-311+G(d,p) |        |        |          |                 |
|                              | $E_H$  | $E_L$  | $E_{HL}$ | $\Delta E_{HL}$ |
| C <sub>20</sub>              | -7.355 | -1.960 | 5.395    |                 |
| C <sub>19</sub> Si           | -7.765 | -2.044 | 5.722    | 6.06%           |
| $\omega$ B97XD /def2TVZP     |        |        |          |                 |
|                              | $E_H$  | $E_L$  | $E_{HL}$ | $\Delta E_{HL}$ |
| C <sub>20</sub>              | -7.246 | -1.817 | 5.429    |                 |
| C <sub>19</sub> Si           | -7.655 | -1.927 | 5.727    | 5.49%           |
| M06L/6-31G(d)                |        |        |          |                 |
|                              | $E_H$  | $E_L$  | $E_{HL}$ | $\Delta E_{HL}$ |
| C <sub>20</sub>              | -4.464 | -3.607 | 0.857    |                 |
| C <sub>19</sub> Si           | -5.059 | -3.730 | 1.329    | 55.10%          |
| M06L/6-311+G(d,p)            |        |        |          |                 |
|                              | $E_H$  | $E_L$  | $E_{HL}$ | $\Delta E_{HL}$ |
| C <sub>20</sub>              | -4.710 | -3.847 | 0.862    |                 |
| C <sub>19</sub> Si           | -5.198 | -3.901 | 1.297    | 50.36%          |
| M06L/def2TVZP                |        |        |          |                 |
|                              | $E_H$  | $E_L$  | $E_{HL}$ | $\Delta E_{HL}$ |
| C <sub>20</sub>              | -4,542 | -3,652 | 0,890    |                 |
| C <sub>19</sub> Si           | -5,049 | -3,734 | 1,315    | 47.80%          |
| M062X/6-31G(d)               |        |        |          |                 |



|                    | $E_H$  | $E_L$  | $E_{HL}$ | $\Delta E_{HL}$ |
|--------------------|--------|--------|----------|-----------------|
| $C_{20}$           | -6.310 | -2.427 | 3.883    |                 |
| $C_{19}Si$         | -6.843 | -2.589 | 4.254    | 9.57%           |
| M062X/6-311+G(d,p) |        |        |          |                 |
|                    | $E_H$  | $E_L$  | $E_{HL}$ | $\Delta E_{HL}$ |
| $C_{20}$           | -6.310 | -2.427 | 3.883    |                 |
| $C_{19}Si$         | -7.104 | -2.923 | 4.181    | 7.68%           |
| M062X/def2TVZP     |        |        |          |                 |
|                    | $E_H$  | $E_L$  | $E_{HL}$ | $\Delta E_{HL}$ |
| $C_{20}$           | -6.540 | -2.689 | 3.851    |                 |
| $C_{19}Si$         | -6.968 | -2.779 | 4.188    | 8.76%           |

**Table S4.** Si-C bond lengths and Merz-Kollmann (MK) charges on the Si-atom and adjacent carbons.

| XCF/basis set               | Bond length (Å) |         |         | MK charges ( $e$ ) |       |       |        |
|-----------------------------|-----------------|---------|---------|--------------------|-------|-------|--------|
|                             | C1-Si           | C2-Si   | C3-Si   | C1                 | C2    | C3    | Si     |
| $\omega B97XD/6-31G(d)$     | 1.98894         | 1.98900 | 1.98895 | 0.116              | 0.110 | 0.081 | -0.222 |
| $\omega B97XD/6-311+G(d,p)$ | 1.98812         | 1.98799 | 1.98801 | 0.069              | 0.093 | 0.064 | -0.162 |
| $\omega B97XD/DF2TZVP$      | 1.97993         | 1.97987 | 1.97976 | 0.053              | 0.108 | 0.107 | -0.191 |
| M062X/6-31G(d)              | 2.00155         | 2.00156 | 2.00131 | 0.047              | 0.047 | 0.061 | -0.142 |
| M062X/6-311+G(d,p)          | 2.00052         | 2.00063 | 2.00038 | 0.031              | 0.060 | 0.035 | -0.092 |
| M062X/6-311++G(d,p)         | 2.00052         | 2.00063 | 2.00038 | 0.031              | 0.060 | 0.035 | -0.092 |
| M062X/DF2TZVP               | 1.99038         | 1.99058 | 1.99057 | 0.085              | 0.090 | 0.028 | -0.143 |
| M06L/6-31G(d)               | 1.99147         | 1.99131 | 1.9914  | 0.032              | 0.082 | 0.075 | -0.174 |
| M06L/6-311+G(d,p)           | 1.99006         | 1.99000 | 1.98985 | 0.075              | 0.023 | 0.070 | -0.142 |
| M06L/DF2TZVP                | 1.98098         | 1.98094 | 1.98089 | 0.048              | 0.075 | 0.047 | -0.159 |
| B3LYP/6-31G(d)              | 2.00814         | 2.00839 | 2.00871 | 0.106              | 0.105 | 0.022 | -0.222 |
| B3LYP/6-311+G(d,p)          | 2.00745         | 2.00737 | 2.00734 | 0.054              | 0.044 | 0.031 | -0.112 |
| B3LYP/DF2TZVP               | 1.99733         | 1.9974  | 1.99736 | 0.072              | 0.048 | 0.051 | -0.131 |

**Table S5.** Adsorption energies (in eV),  $E_{ads}$ , and adsorption energy with and without BSSE corrections,  $E_{ads}(BSSE)$ , for the dimers formed between  $C_{20}$  fullerenes with CO, CO<sub>2</sub> and N<sub>2</sub> molecules calculated with the theoretical levels  $\omega B97XD/6-31G(d)$  and  $\omega B97XD/6-311+G(d,p)$ .

| Molecules                 | $\omega B97XD/6-31G(d)$ |           |                 | $\omega B97XD/6-311+G(d,p)$ |           |                 |
|---------------------------|-------------------------|-----------|-----------------|-----------------------------|-----------|-----------------|
|                           | BSSE                    | $E_{ads}$ | $E_{ads}(BSSE)$ | BSSE                        | $E_{ads}$ | $E_{ads}(BSSE)$ |
| $C_{20}$ -CO              | 0.040                   | -0.080    | -0.040          | 0.023                       | -0.065    | -0.042          |
| $C_{20}$ -CO <sub>2</sub> | 0.045                   | -0.110    | -0.066          | 0.029                       | -0.104    | -0.075          |
| $C_{20}$ -N <sub>2</sub>  | 0.034                   | -0.076    | -0.042          | 0.024                       | -0.066    | -0.042          |

**Table S6.** Externally oriented electric field effect on the BSSE correction, adsorption energies,  $E_{ads}$ , and BSSE corrected,  $E_{ads}(BSSE)$ , for the interaction of  $C_{20}$  and  $C_{19}Si$  fullerenes with the  $CO$ ,  $CO_2$  and  $N_2$  molecules as obtained at the  $\omega B97XD/6-31G(d)$  and  $\omega B97XD/6-311+G(d,p)$  levels of theory. Adjusted adsorption energy,  $E_{ads}(fit)$  and the R-squared coefficient of determination,  $R^2$ , are also presented. All energies in eV.

| $\omega$ B97XD/6-31G(d)            |       |           |                 |                | $\omega$ B97XD/6-311+G(d,p) |       |           |                 |                |
|------------------------------------|-------|-----------|-----------------|----------------|-----------------------------|-------|-----------|-----------------|----------------|
| C <sub>19</sub> Si-CO              |       |           |                 |                |                             |       |           |                 |                |
| $F$                                | BSSE  | $E_{ads}$ | $E_{ads}(BSSE)$ | $E_{ads}(fit)$ | $F$                         | BSSE  | $E_{ads}$ | $E_{ads}(BSSE)$ | $E_{ads}(fit)$ |
| 0.000                              | 0.134 | -0.837    | -0.703          | -0.650         | 0.000                       | 0.049 | -0.787    | -0.738          | -0.677         |
| 0.001                              | 0.134 | -0.884    | -0.749          | -0.717         | 0.001                       | 0.049 | -0.838    | -0.788          | -0.749         |
| 0.005                              | 0.140 | -1.097    | -0.957          | -0.987         | 0.005                       | 0.050 | -1.060    | -1.009          | -1.039         |
| 0.010                              | 0.148 | -1.409    | -1.261          | -1.323         | 0.010                       | 0.052 | -1.380    | -1.328          | -1.401         |
| 0.015                              | 0.157 | -1.766    | -1.609          | -1.660         | 0.015                       | 0.052 | -1.746    | -1.694          | -1.763         |
| 0.020                              | 0.168 | -2.157    | -1.989          | -1.997         | 0.020                       | 0.054 | -2.159    | -2.105          | -2.125         |
| 0.025                              | 0.180 | -2.581    | -2.400          | -2.334         | 0.025                       | 0.053 | -2.631    | -2.579          | -2.488         |
| $R^2$                              | 0.994 |           |                 |                | $R^2$                       | 0.991 |           |                 |                |
| C <sub>19</sub> Si-CO <sub>2</sub> |       |           |                 |                |                             |       |           |                 |                |
| $F$                                | BSSE  | $E_{ads}$ | $E_{ads}(BSSE)$ | $E_{ads}(fit)$ | $F$                         | BSSE  | $E_{ads}$ | $E_{ads}(BSSE)$ | $E_{ads}(fit)$ |
| 0.000                              | 0.027 | -0.095    | -0.068          | -0.076         | 0.000                       | 0.015 | -0.092    | -0.077          | -0.083         |
| 0.001                              | 0.040 | -0.121    | -0.081          | -0.075         | 0.001                       | 0.023 | -0.109    | -0.087          | -0.082         |
| 0.005                              | 0.045 | -0.130    | -0.085          | -0.081         | 0.005                       | 0.026 | -0.118    | -0.091          | -0.09          |
| 0.010                              | 0.052 | -0.162    | -0.110          | -0.110         | 0.010                       | 0.029 | -0.153    | -0.124          | -0.125         |
| 0.015                              | 0.062 | -0.223    | -0.161          | -0.162         | 0.015                       | 0.032 | -0.225    | -0.194          | -0.189         |
| 0.020                              | 0.076 | -0.310    | -0.234          | -0.238         | 0.020                       | 0.034 | -0.307    | -0.272          | -0.280         |
| 0.025                              | 0.093 | -0.432    | -0.339          | -0.337         | 0.025                       | 0.036 | -0.438    | -0.402          | -0.399         |
| $R^2$                              | 0.998 |           |                 |                | $R^2$                       | 0.998 |           |                 |                |
| C <sub>19</sub> Si-N <sub>2</sub>  |       |           |                 |                |                             |       |           |                 |                |
| $F$                                | BSSE  | $E_{ads}$ | $E_{ads}(BSSE)$ | $E_{ads}(fit)$ | $F$                         | BSSE  | $E_{ads}$ | $E_{ads}(BSSE)$ | $E_{ads}(fit)$ |
| 0.000                              | 0.134 | -0.837    | -0.017          | -0.031         | 0.000                       | 0.024 | -0.069    | -0.045          | -0.044         |
| 0.001                              | 0.134 | -0.884    | -0.045          | -0.034         | 0.001                       | 0.026 | -0.072    | -0.046          | -0.046         |
| 0.005                              | 0.140 | -1.097    | -0.054          | -0.048         | 0.005                       | 0.026 | -0.082    | -0.056          | -0.057         |
| 0.010                              | 0.148 | -1.409    | -0.072          | -0.072         | 0.010                       | 0.027 | -0.104    | -0.077          | -0.078         |
| 0.015                              | 0.157 | -1.766    | -0.097          | -0.101         | 0.015                       | 0.029 | -0.143    | -0.114          | -0.109         |
| 0.020                              | 0.168 | -2.157    | -0.132          | -0.135         | 0.020                       | 0.030 | -0.177    | -0.146          | -0.150         |
| 0.025                              | 0.180 | -2.581    | -0.177          | -0.174         | 0.025                       | 0.032 | -0.233    | -0.201          | -0.200         |

$R^2$  0.980 $R^2$  0.998

**Table S7.** Energies (in eV) of the HOMO,  $E_H$ , LUMO,  $E_L$  and the gap between them,  $E_{HL}$ , calculated with the theoretical levels  $\omega$ B97XD/6-31G(d) and  $\omega$ B97XD/6-311+G(d,p), for the dimers.. The percentual change in the fullerene energy gap after adsorbing the gas, in relation to the fullerene energy gap before adsorption, is represented by  $\Delta E_{HL}$  (in %). Positive values of  $\Delta E_{HL}$  indicate an increase in the gap, negative values indicate a reduction.

| Dimers                             | $\omega$ B97XD /6-31G(d)  |        |          |                 | $\omega$ B97XD /6-311+G(d,p) |         |          |                 |
|------------------------------------|---------------------------|--------|----------|-----------------|------------------------------|---------|----------|-----------------|
|                                    | $F = 0.000 \text{ a. u.}$ |        |          |                 |                              |         |          |                 |
|                                    | $E_H$                     | $E_L$  | $E_{HL}$ | $\Delta E_{HL}$ | $E_H$                        | $E_L$   | $E_{HL}$ | $\Delta E_{HL}$ |
| C <sub>20</sub> -CO                | -7.045                    | -1.580 | 5.465    | 0.130           | -7.355                       | -1.957  | 5.397    | 0.050           |
| C <sub>20</sub> -CO <sub>2</sub>   | -7.072                    | -1.607 | 5.465    | 0.145           | -7.405                       | -2.011  | 5.394    | -0.020          |
| C <sub>20</sub> -N <sub>2</sub>    | -7.039                    | -1.579 | 5.461    | 0.060           | -7.356                       | -1.958  | 5.397    | 0.050           |
| Dimers                             | $F = 0.000 \text{ a. u.}$ |        |          |                 |                              |         |          |                 |
|                                    | $E_H$                     | $E_L$  | $E_{HL}$ | $\Delta E_{HL}$ | $E_H$                        | $E_L$   | $E_{HL}$ | $\Delta E_{HL}$ |
| C <sub>19</sub> Si-CO              | -6.888                    | -2.256 | 4.632    | -20.212         | -7.188                       | -2.609  | 4.579    | -19.966         |
| C <sub>19</sub> Si-CO <sub>2</sub> | -7.516                    | -1.739 | 5.776    | -0.497          | -7.740                       | -2.055  | 5.684    | -0.652          |
| C <sub>19</sub> Si-N <sub>2</sub>  | -7.534                    | -1.733 | 5.801    | -0.080          | -7.760                       | -2.048  | 5.712    | -0.171          |
| Dimers                             | $F = 0.001 \text{ a. u.}$ |        |          |                 |                              |         |          |                 |
|                                    | $E_H$                     | $E_L$  | $E_{HL}$ | $\Delta E_{HL}$ | $E_H$                        | $E_L$   | $E_{HL}$ | $\Delta E_{HL}$ |
| C <sub>19</sub> Si-CO              | -7.257                    | -2.637 | 4.620    | -20.418         | -7.563                       | -2.981  | 4.581    | -19.928         |
| C <sub>19</sub> Si-CO <sub>2</sub> | -7.791                    | -2.031 | 5.760    | -0.778          | -7.759                       | -2.093  | 5.666    | -0.975          |
| C <sub>19</sub> Si-N <sub>2</sub>  | -7.734                    | -1.949 | 5.785    | -0.351          | -7.766                       | -2.072  | 5.694    | -0.485          |
| Dimers                             | $F = 0.005 \text{ a. u.}$ |        |          |                 |                              |         |          |                 |
|                                    | $E_H$                     | $E_L$  | $E_{HL}$ | $\Delta E_{HL}$ | $E_H$                        | $E_L$   | $E_{HL}$ | $\Delta E_{HL}$ |
| C <sub>19</sub> Si-CO              | -8.741                    | -4.125 | 4.616    | -20.488         | -9.067                       | -4.491  | 4.576    | -20.023         |
| C <sub>19</sub> Si-CO <sub>2</sub> | -8.889                    | -3.201 | 5.688    | -2.030          | -9.131                       | -3.543  | 5.588    | -2.340          |
| C <sub>19</sub> Si-N <sub>2</sub>  | -8.522                    | -2.814 | 5.708    | -1.683          | -8.767                       | -3.154  | 5.613    | -1.893          |
| Dimers                             | $F = 0.010 \text{ a. u.}$ |        |          |                 |                              |         |          |                 |
|                                    | $E_H$                     | $E_L$  | $E_{HL}$ | $\Delta E_{HL}$ | $E_H$                        | $E_L$   | $E_{HL}$ | $\Delta E_{HL}$ |
| C <sub>19</sub> Si-CO              | -10.589                   | -6.014 | 4.575    | -21.192         | -10.959                      | -6.416  | 4.543    | -20.594         |
| C <sub>19</sub> Si-CO <sub>2</sub> | -10.279                   | -4.673 | 5.605    | -3.446          | -10.556                      | -5.051  | 5.504    | -3.794          |
| C <sub>19</sub> Si-N <sub>2</sub>  | -9.504                    | -3.896 | 5.607    | -3.412          | -9.783                       | -4.275  | 5.507    | -3.748          |
| Dimers                             | $F = 0.015 \text{ a. u.}$ |        |          |                 |                              |         |          |                 |
|                                    | $E_H$                     | $E_L$  | $E_{HL}$ | $\Delta E_{HL}$ | $E_H$                        | $E_L$   | $E_{HL}$ | $\Delta E_{HL}$ |
| C <sub>19</sub> Si-CO              | -12.431                   | -7.920 | 4.511    | -22,297         | -12,869                      | -8,377  | 4,492    | -21,498         |
| C <sub>19</sub> Si-CO <sub>2</sub> | -11.657                   | -6.143 | 5.514    | -5,016          | -8,153                       | -2,720  | 5,433    | -5,046          |
| C <sub>19</sub> Si-N <sub>2</sub>  | -10.485                   | -4.980 | 5.505    | -5,166          | -7,904                       | -2,479  | 5,425    | -5,175          |
| Dimers                             | $F = 0.020 \text{ a. u.}$ |        |          |                 |                              |         |          |                 |
|                                    | $E_H$                     | $E_L$  | $E_{HL}$ | $\Delta E_{HL}$ | $E_H$                        | $E_L$   | $E_{HL}$ | $\Delta E_{HL}$ |
| C <sub>19</sub> Si-CO              | -14.298                   | -9.830 | 4.468    | -23.033         | -14.808                      | -10.373 | 4.435    | -22.492         |
| C <sub>19</sub> Si-CO <sub>2</sub> | -13.036                   | -7.607 | 5.429    | -6.477          | -13.433                      | -8.136  | 5.297    | -7.414          |
| C <sub>19</sub> Si-N <sub>2</sub>  | -11.475                   | -6.065 | 5.410    | -6.807          | -11.869                      | -6.595  | 5.274    | -7.815          |

| Dimers                             | $F = 0.025 \text{ a.u.}$ |         |          |                 |         |         |          |                 |
|------------------------------------|--------------------------|---------|----------|-----------------|---------|---------|----------|-----------------|
|                                    | $E_H$                    | $E_L$   | $E_{HL}$ | $\Delta E_{HL}$ | $E_H$   | $E_L$   | $E_{HL}$ | $\Delta E_{HL}$ |
| C <sub>19</sub> Si-CO              | -16.191                  | -11.740 | 4.451    | -23.326         | -16.768 | -12.492 | 4.276    | -25.264         |
| C <sub>19</sub> Si-CO <sub>2</sub> | -14.439                  | -9.066  | 5.373    | -7.439          | -14.956 | -10.362 | 4.594    | -19.703         |
| C <sub>19</sub> Si-N <sub>2</sub>  | -12.484                  | -7.155  | 5.330    | -8.194          | -12.996 | -8.488  | 4.508    | -21.212         |

**Table S8.** Topological parameters calculated using the Quantum Theory of Atoms in Molecules (QTAIM) with the theoretical level  $\omega$ B97XD /6-31G(d). Results are presented for all dimers formed by C<sub>20</sub> and C<sub>19</sub>Si fullerenes with adsorbed gas molecules. The results were obtained for all electric field values and are all presented in atomic units.

| Dimers                             | $\omega$ B97XD/6-31G(d)  |      |                             |                                      |                          |                          |                          |                     |
|------------------------------------|--------------------------|------|-----------------------------|--------------------------------------|--------------------------|--------------------------|--------------------------|---------------------|
|                                    | $F = 0.000 \text{ a.u.}$ |      |                             |                                      |                          |                          |                          |                     |
|                                    | BCP                      | Bond | $\rho_{BCP} \times 10^{-3}$ | $\nabla^2 \rho_{BCP} \times 10^{-2}$ | $H_{BCP} \times 10^{-4}$ | $G_{BCP} \times 10^{-3}$ | $V_{BCP} \times 10^{-3}$ | $ G_{BCP}/V_{BCP} $ |
| C <sub>20</sub> -CO                | 1                        | C-C  | 3.704                       | 1.239                                | 6.475                    | 2.451                    | -1.804                   | 1.359               |
|                                    | 2                        | C-O  | 2.760                       | 1.132                                | 5.118                    | 2.317                    | -1.806                   | 1.283               |
| C <sub>20</sub> -CO <sub>2</sub>   | 1                        | C-O  | 2.926                       | 1.225                                | 4.988                    | 2.563                    | -2.064                   | 1.242               |
|                                    | 2                        | C-O  | 2.458                       | 1.122                                | 4.738                    | 2.331                    | -1.857                   | 1.255               |
|                                    | 3                        | C-O  | 2.441                       | 1.094                                | 4.170                    | 2.317                    | -1.900                   | 1.220               |
| C <sub>20</sub> -N <sub>2</sub>    | 1                        | C-N  | 3.564                       | 1.146                                | 4.610                    | 2.404                    | -1.943                   | 1.237               |
|                                    | 2                        | C-N  | 3.677                       | 1.184                                | 4.532                    | 2.507                    | -2.054                   | 1.221               |
| C <sub>19</sub> Si-CO              | 1                        | Si-C | 18.256                      | 13.592                               | -14.977                  | 35.478                   | -36.976                  | 0.959               |
|                                    | 2                        | Si-C | 16.693                      | 13.265                               | -9.297                   | 35.533                   | -37.084                  | 0.958               |
|                                    | 3                        | Si-C | 18.351                      | 13.593                               | -15.515                  | 34.092                   | -35.022                  | 0.973               |
|                                    | 4                        | Si-C | 16.969                      | 35.720                               | 137.366                  | 75.564                   | -61.827                  | 1.222               |
|                                    | 5                        |      | 16.968                      | 35.240                               | 133.473                  | 74.753                   | -61.406                  | 1.2174              |
|                                    | 6                        |      | 16.950                      | 33.938                               | 123.195                  | 72.525                   | -60.205                  | 1.2046              |
|                                    | 7                        |      | 15.970                      | 27.519                               | 79.730                   | 60.825                   | -52.852                  | 1.1509              |
| C <sub>19</sub> Si-CO <sub>2</sub> | 1                        | Si-O | 3.623                       | 1.257                                | 4.928                    | 2.649                    | -2.156                   | 1.2285              |
|                                    | 2                        | Si-O | 3.906                       | 1.301                                | 8.257                    | 2.428                    | -1.602                   | 1.5155              |
| C <sub>19</sub> Si-N <sub>2</sub>  | 1                        | Si-N | 1.955                       | 0.557                                | 3.054                    | 1.087                    | -0.782                   | 1.391               |
| Dimers                             | $F = 0.001 \text{ a.u.}$ |      |                             |                                      |                          |                          |                          |                     |
|                                    | BCP                      | Bond | $\rho_{BCP} \times 10^{-3}$ | $\nabla^2 \rho_{BCP} \times 10^{-2}$ | $H_{BCP} \times 10^{-4}$ | $G_{BCP} \times 10^{-3}$ | $V_{BCP} \times 10^{-3}$ | $ G_{BCP}/V_{BCP} $ |
| C <sub>19</sub> Si-CO              | 1                        | Si-C | 17.948                      | 13.307                               | -14.384                  | 34.705                   | -36.144                  | 0.960               |
|                                    | 2                        | Si-C | 17.850                      | 13.302                               | -13.867                  | 34.641                   | -36.027                  | 0.961               |
|                                    | 3                        | Si-C | 16.473                      | 12.987                               | -9.191                   | 33.387                   | -34.306                  | 0.973               |
|                                    | 4                        |      | 16.504                      | 33.454                               | 122.812                  | 71.355                   | -59.073                  | 1.2079              |
|                                    | 5                        |      | 15.669                      | 27.605                               | 82.555                   | 60.757                   | -52.501                  | 1.1572              |
| C <sub>19</sub> Si-CO <sub>2</sub> | 1                        | Si-O | 5.278                       | 1.743                                | 2.901                    | 4.068                    | -3.778                   | 1.0768              |
| C <sub>19</sub> Si-N <sub>2</sub>  | 1                        | C-N  | 3.342                       | 1.124                                | 4.152                    | 2.394                    | -1.979                   | 1.210               |
|                                    | 2                        | Si-N | 3.464                       | 1.027                                | 3.293                    | 2.239                    | -1.9010                  | 1.172               |
| Dimers                             | $F = 0.005 \text{ a.u.}$ |      |                             |                                      |                          |                          |                          |                     |
|                                    | BCP                      | Bond | $\rho_{BCP} \times 10^{-3}$ | $\nabla^2 \rho_{BCP} \times 10^{-2}$ | $H_{BCP} \times 10^{-4}$ | $G_{BCP} \times 10^{-3}$ | $V_{BCP} \times 10^{-3}$ | $ G_{BCP}/V_{BCP} $ |
| C <sub>19</sub> Si-CO              | 1                        | Si-C | 17.254                      | 13.077                               | -11.884                  | 33.881                   | -35.070                  | 0.966               |
|                                    | 2                        | Si-C | 17.202                      | 13.079                               | -11.575                  | 33.856                   | -35.013                  | 0.967               |

|                                    |     |      |                             |                                     |                          |                          |                          |                     |
|------------------------------------|-----|------|-----------------------------|-------------------------------------|--------------------------|--------------------------|--------------------------|---------------------|
|                                    | 3   | Si-C | 16.017                      | 12.768                              | -7.9833                  | 32.719                   | -33.517                  | 0.976               |
|                                    | 4   | Si-C | 16.011                      | 34.688                              | 136.235                  | 73.099                   | -59.476                  | 1.229               |
| C <sub>19</sub> Si-CO <sub>2</sub> | 1   | C-O  | 3.390                       | 1.521                               | 6.239                    | 3.178                    | -0.624                   | 5.093               |
|                                    | 2   | Si-O | 5.740                       | 1.932                               | 2.848                    | 4.545                    | -4.260                   | 1.067               |
| C <sub>19</sub> Si-N <sub>2</sub>  | 1   | C-N  | 3.624                       | 1.192                               | 4.301                    | 2.551                    | -2.121                   | 1.203               |
|                                    | 2   | Si-N | 3.622                       | 1.113                               | 3.541                    | 2.427                    | -2.072                   | 1.171               |
| <i>F</i> = 0.010 <i>a. u.</i>      |     |      |                             |                                     |                          |                          |                          |                     |
| <b>Dimers</b>                      | BCP | Bond | $\rho_{BCP} \times 10^{-3}$ | $\nabla^2\rho_{BCP} \times 10^{-2}$ | $H_{BCP} \times 10^{-4}$ | $G_{BCP} \times 10^{-3}$ | $V_{BCP} \times 10^{-3}$ | $ G_{BCP}/V_{BCP} $ |
|                                    | 1   | Si-C | 16.202                      | 12.805                              | -7.832                   | 32.795                   | -33.578                  | 0.977               |
|                                    | 2   | Si-C | 16.726                      | 12.995                              | -9.367                   | 33.423                   | -34.360                  | 0.973               |
| C <sub>19</sub> Si-CO              | 3   | Si-C | 15.465                      | 12.554                              | -5.991                   | 31.985                   | -32.584                  | 9.816               |
|                                    | 4   |      | 15.313                      | 28.936                              | 96.422                   | 62.697                   | -53.054                  | 1.182               |
|                                    | 5   |      | 14.762                      | 26.454                              | 80.775                   | 58.058                   | -49.981                  | 1.162               |
| C <sub>19</sub> Si-CO <sub>2</sub> | 1   |      | 3.925                       | 1.760                               | 7.226                    | 3.677                    | -2.955                   | 1.245               |
|                                    | 2   |      | 6.528                       | 2.172                               | 1.915                    | 5.210                    | -5.048                   | 1.038               |
| C <sub>19</sub> Si-N <sub>2</sub>  | 1   | C-N  | 3.950                       | 1.294                               | 4.499                    | 2.786                    | -2.336                   | 1.193               |
|                                    | 2   | Si-N | 4.064                       | 1.292                               | 3.853                    | 2.845                    | -2.460                   | 1.157               |
| <i>F</i> = 0.015 <i>a. u.</i>      |     |      |                             |                                     |                          |                          |                          |                     |
| <b>Dimers</b>                      | BCP | Bond | $\rho_{BCP} \times 10^{-3}$ | $\nabla^2\rho_{BCP} \times 10^{-2}$ | $H_{BCP} \times 10^{-4}$ | $G_{BCP} \times 10^{-3}$ | $V_{BCP} \times 10^{-3}$ | $ G_{BCP}/V_{BCP} $ |
| C <sub>19</sub> Si-CO              | 1   | Si-C | 66.488                      | 24.612                              | -246.685                 | 86.198                   | -110.866                 | 0.778               |
| C <sub>19</sub> Si-CO <sub>2</sub> | 1   | C-O  | 4.174                       | 1.920                               | 7.843                    | 4.017                    | -7.843                   | 5.121               |
|                                    | 2   | Si-O | 8.587                       | 2.718                               | -1.205                   | 6.917                    | -7.037                   | 0.983               |
| C <sub>19</sub> Si-N <sub>2</sub>  | 1   | C-N  | 2.982                       | 1.195                               | 5.559                    | 2.431                    | -1.876                   | 1.2964              |
|                                    | 2   | Si-N | 5.814                       | 1.913                               | 4.681                    | 4.315                    | -3.846                   | 1.1217              |
| <i>F</i> = 0.020 <i>a. u.</i>      |     |      |                             |                                     |                          |                          |                          |                     |
| <b>Dimers</b>                      | BCP | Bond | $\rho_{BCP} \times 10^{-3}$ | $\nabla^2\rho_{BCP} \times 10^{-2}$ | $H_{BCP} \times 10^{-4}$ | $G_{BCP} \times 10^{-3}$ | $V_{BCP} \times 10^{-3}$ | $ G_{BCP}/V_{BCP} $ |
| C <sub>19</sub> Si-CO              | 1   | Si-C | 75.218                      | 18.519                              | -317.233                 | 78.021                   | -109.74                  | 0.711               |
| C <sub>19</sub> Si-CO <sub>2</sub> | 1   | Si-O | 12.480                      | 2.993                               | -2.139                   | 7.696                    | -7.910                   | 0.973               |
| C <sub>19</sub> Si-N <sub>2</sub>  | 1   | Si-N | 8.297                       | 2.100                               | 4.859                    | 4.764                    | -4.278                   | 1.114               |
| <i>F</i> = 0.025 <i>a. u.</i>      |     |      |                             |                                     |                          |                          |                          |                     |
| <b>Dimers</b>                      | BCP | Bond | $\rho_{BCP} \times 10^{-3}$ | $\nabla^2\rho_{BCP} \times 10^{-2}$ | $H_{BCP} \times 10^{-4}$ | $G_{BCP} \times 10^{-3}$ | $V_{BCP} \times 10^{-3}$ | $ G_{BCP}/V_{BCP} $ |
| C <sub>19</sub> Si-CO              | 1   | Si-C | 77.475                      | 17.822                              | -340.719                 | 78.628                   | -112.699                 | 0.698               |
| C <sub>19</sub> Si-CO <sub>2</sub> | 1   | Si-O | 18.086                      | 3.699                               | -10.581                  | 10.306                   | -11.364                  | 0.907               |
| C <sub>19</sub> Si-N <sub>2</sub>  | 1   | Si-N | 10.488                      | 2.481                               | 4.123                    | 5.710                    | -53.776                  | 1.0767              |

**Table S9.** Topological parameters calculated using the Quantum Theory of Atoms in Molecules (QTAIM) with the theoretical level  $\omega$ B97XD /6-311+G(d,p). Results are presented for all dimers formed by C<sub>20</sub> and C<sub>19</sub>Si fullerenes with adsorbed gas molecules. The results were obtained for all electric field values and are all presented in atomic units.

| $\omega$ B97XD/6-311+G(d,p)        |                          |      |                             |                                      |                          |                          |                          |                     |
|------------------------------------|--------------------------|------|-----------------------------|--------------------------------------|--------------------------|--------------------------|--------------------------|---------------------|
| Dimers                             | $F = 0.000 \text{ a.u.}$ |      |                             |                                      |                          |                          |                          |                     |
|                                    | BCP                      | Bond | $\rho_{BCP} \times 10^{-3}$ | $\nabla^2 \rho_{BCP} \times 10^{-2}$ | $H_{BCP} \times 10^{-4}$ | $G_{BCP} \times 10^{-3}$ | $V_{BCP} \times 10^{-3}$ | $ G_{BCP}/V_{BCP} $ |
| C <sub>20</sub> -CO                | 1                        | C-C  | 3.686                       | 1.054                                | 6.371                    | 1.998                    | -1.361                   | 1.468               |
|                                    | 2                        | C-O  | 2.736                       | 0.978                                | 5.130                    | 1.932                    | -1.419                   | 1.361               |
| C <sub>20</sub> -CO <sub>2</sub>   | 1                        | C-C  | 4.766                       | 1.884                                | 11.374                   | 3.572                    | -2.434                   | 1.467               |
| C <sub>20</sub> -N <sub>2</sub>    | 1                        | C-N  | 2.866                       | 0.962                                | 5.162                    | 1.888                    | -1.372                   | 1.376               |
|                                    | 2                        | C-N  | 2.635                       | 0.872                                | 4.617                    | 1.718                    | -1.256                   | 1.367               |
| C <sub>19</sub> Si-CO              | 1                        | Si-C | 70.630                      | 20.211                               | -276.945                 | 78.223                   | -105.91                  | 0.738               |
| C <sub>19</sub> Si-CO <sub>2</sub> | 1                        | Si-O | 5.744                       | 1.625                                | 7.969                    | 3.266                    | -2.470                   | 1.323               |
|                                    | 1                        | C-N  | 3.078                       | 1.026                                | 5.654                    | 2.000                    | -1.435                   | 1.394               |
| C <sub>19</sub> Si-N <sub>2</sub>  | 2                        | Si-N | 4.126                       | 1.135                                | 4.793                    | 2.360                    | -1.880                   | 1.255               |
| $F = 0.001 \text{ a.u.}$           |                          |      |                             |                                      |                          |                          |                          |                     |
| Dimers                             | BCP                      | Bond | $\rho_{BCP} \times 10^{-3}$ | $\nabla^2 \rho_{BCP} \times 10^{-2}$ | $H_{BCP} \times 10^{-4}$ | $G_{BCP} \times 10^{-3}$ | $V_{BCP} \times 10^{-3}$ | $ G_{BCP}/V_{BCP} $ |
| C <sub>19</sub> Si-CO              | 1                        | Si-C | 70.630                      | 20.211                               | -276.945                 | 78.223                   | -105.917                 | 0.738               |
| C <sub>19</sub> Si-CO <sub>2</sub> | 1                        | Si-O | 6.177                       | 1.633                                | 4.400                    | 3.643                    | -3.203                   | 1.137               |
|                                    | 1                        | C-N  | 3.665                       | 1.215                                | 6.606                    | 2.376                    | -1.716                   | 1.385               |
| C <sub>19</sub> Si-N <sub>2</sub>  | 2                        | Si-N | 4.514                       | 1.253                                | 5.124                    | 2.620                    | -2.107                   | 1.243               |
| $F = 0.005 \text{ a.u.}$           |                          |      |                             |                                      |                          |                          |                          |                     |
| Dimers                             | BCP                      | Bond | $\rho_{BCP} \times 10^{-3}$ | $\nabla^2 \rho_{BCP} \times 10^{-2}$ | $H_{BCP} \times 10^{-4}$ | $G_{BCP} \times 10^{-3}$ | $V_{BCP} \times 10^{-3}$ | $ G_{BCP}/V_{BCP} $ |
| C <sub>19</sub> Si-CO              | 1                        | Si-C | 71.154                      | 19.405                               | -285.140                 | 77.027                   | -105.541                 | 0.730               |
| C <sub>19</sub> Si-CO <sub>2</sub> | 1                        | C-O  | 3.922                       | 1.523                                | 8.174                    | 2.990                    | -2.173                   | 1.376               |
|                                    | 2                        | Si-O | 6.170                       | 1.665                                | 3.751                    | 3.787                    | -3.412                   | 1.110               |
| C <sub>19</sub> Si-N <sub>2</sub>  | 1                        | C-N  | 3.408                       | 1.135                                | 6.285                    | 2.208                    | -1.579                   | 1.398               |
|                                    | 2                        | Si-N | 4.519                       | 1.254                                | 5.144                    | 2.622                    | -2.107                   | 1.244               |
| $F = 0.010 \text{ a.u.}$           |                          |      |                             |                                      |                          |                          |                          |                     |
| Dimers                             | BCP                      | Bond | $\rho_{BCP} \times 10^{-3}$ | $\nabla^2 \rho_{BCP} \times 10^{-2}$ | $H_{BCP} \times 10^{-4}$ | $G_{BCP} \times 10^{-3}$ | $V_{BCP} \times 10^{-3}$ | $ G_{BCP}/V_{BCP} $ |
| C <sub>19</sub> Si-CO              | 1                        | Si-C | 73.074                      | 18.976                               | -303.144                 | 77.755                   | -108.070                 | 0.719               |
| C <sub>19</sub> Si-CO <sub>2</sub> | 1                        | C-O  | 4.963                       | 1.969                                | 10.203                   | 3.902                    | -2.881                   | 1.354               |
|                                    | 2                        | Si-O | 6.909                       | 1.945                                | 4.489                    | 4.414                    | -3.965                   | 1.113               |
| C <sub>19</sub> Si-N <sub>2</sub>  | 1                        | C-N  | 3.812                       | 1.279                                | 7.106                    | 2.487                    | -1.776                   | 1.400               |
|                                    | 2                        | Si-N | 5.310                       | 1.459                                | 5.588                    | 3.088                    | -2.529                   | 1.221               |
| $F = 0.015 \text{ a.u.}$           |                          |      |                             |                                      |                          |                          |                          |                     |
| Dimers                             | BCP                      | Bond | $\rho_{BCP} \times 10^{-3}$ | $\nabla^2 \rho_{BCP} \times 10^{-2}$ | $H_{BCP} \times 10^{-4}$ | $G_{BCP} \times 10^{-3}$ | $V_{BCP} \times 10^{-3}$ | $ G_{BCP}/V_{BCP} $ |
| C <sub>19</sub> Si-CO              | 1                        | Si-C | 75.200                      | 18.480                               | -323.587                 | 78.559                   | -110.918                 | 0.708               |
| C <sub>19</sub> Si-CO <sub>2</sub> | 1                        | C-O  | 5.041                       | 2.053                                | 11.121                   | 4.020                    | -2.908                   | 1.382               |

|                                    | 2   | Si-O | 8.960                       | 2.422                                | 4.184                    | 5.638                    | -5.219                   | 1.080               |
|------------------------------------|-----|------|-----------------------------|--------------------------------------|--------------------------|--------------------------|--------------------------|---------------------|
|                                    | 1   | C-N  | 4.061                       | 1.393                                | 7.806                    | 2.703                    | -1.922                   | 1.406               |
| C <sub>19</sub> Si-N <sub>2</sub>  | 2   | Si-N | 6.513                       | 1.741                                | 6.012                    | 3.752                    | -3.150                   | 1.191               |
| $F = 0.020 \text{ a. u.}$          |     |      |                             |                                      |                          |                          |                          |                     |
| Dimers                             | BCP | Bond | $\rho_{BCP} \times 10^{-3}$ | $\nabla^2 \rho_{BCP} \times 10^{-2}$ | $H_{BCP} \times 10^{-4}$ | $G_{BCP} \times 10^{-3}$ | $V_{BCP} \times 10^{-3}$ | $ G_{BCP}/V_{BCP} $ |
| C <sub>19</sub> Si-CO              | 1   | Si-C | 78.138                      | 18.319                               | -349.540                 | 80.751                   | -115.705                 | 0.698               |
| C <sub>19</sub> Si-CO <sub>2</sub> | 1   | Si-O | 12.880                      | 3.2435                               | 2.4203                   | 7.867                    | -7.625                   | 1.032               |
|                                    | 1   | C-N  | 4.209                       | 1.522                                | 8.479                    | 2.957                    | -2.109                   | 1.402               |
| C <sub>19</sub> Si-N <sub>2</sub>  | 2   | Si-N | 8.899                       | 2.281                                | 6.614                    | 5.040                    | -4.379                   | 1.151               |
| $F = 0.025 \text{ a. u.}$          |     |      |                             |                                      |                          |                          |                          |                     |
| Dimers                             | BCP | Bond | $\rho_{BCP} \times 10^{-3}$ | $\nabla^2 \rho_{BCP} \times 10^{-2}$ | $H_{BCP} \times 10^{-4}$ | $G_{BCP} \times 10^{-3}$ | $V_{BCP} \times 10^{-3}$ | $ G_{BCP}/V_{BCP} $ |
| C <sub>19</sub> Si-CO              | 1   | Si-C | 80.146                      | 17.195                               | -373.751                 | 80.364                   | -1.17.739                | 0.682               |
| C <sub>19</sub> Si-CO <sub>2</sub> | 1   | Si-O | 19.799                      | 4.395                                | -4.569                   | 11.445                   | -11.902                  | 0.962               |
| C <sub>19</sub> Si-N <sub>2</sub>  | 1   | Si-N | 11.871                      | 28.437                               | 6.329                    | 6.476                    | -5.843                   | 1.108               |

**Table S10.** Critical bond points, BCP, isosurfaces and scatter plots for the dimers formed by C<sub>20</sub> and C<sub>19</sub>Si fullerenes with the adsorbed gas molecules. The results were obtained for all electric field values using both the theoretical level  $\omega$ B97XD/6-31G(d) and  $\omega$ B97XD/6-311+G(d,p).

| $\omega$ B97XD/6-31G(d)                                                                           | $\omega$ B97XD/6-311+G(d,p)                                                                       |
|---------------------------------------------------------------------------------------------------|---------------------------------------------------------------------------------------------------|
| <b>C<sub>20</sub>-CO</b><br>$F = 0.000 \text{ a. u.}$<br>$E_{ads}(BSSE) = -0.04027087 \text{ eV}$ | <b>C<sub>20</sub>-CO</b><br>$F = 0.000 \text{ a. u.}$<br>$E_{ads}(BSSE) = -0.04215341 \text{ eV}$ |
| QTAIM                                                                                             |                                                                                                   |
| 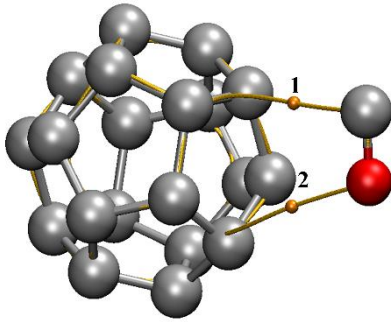               |               |
| RDG                                                                                               |                                                                                                   |

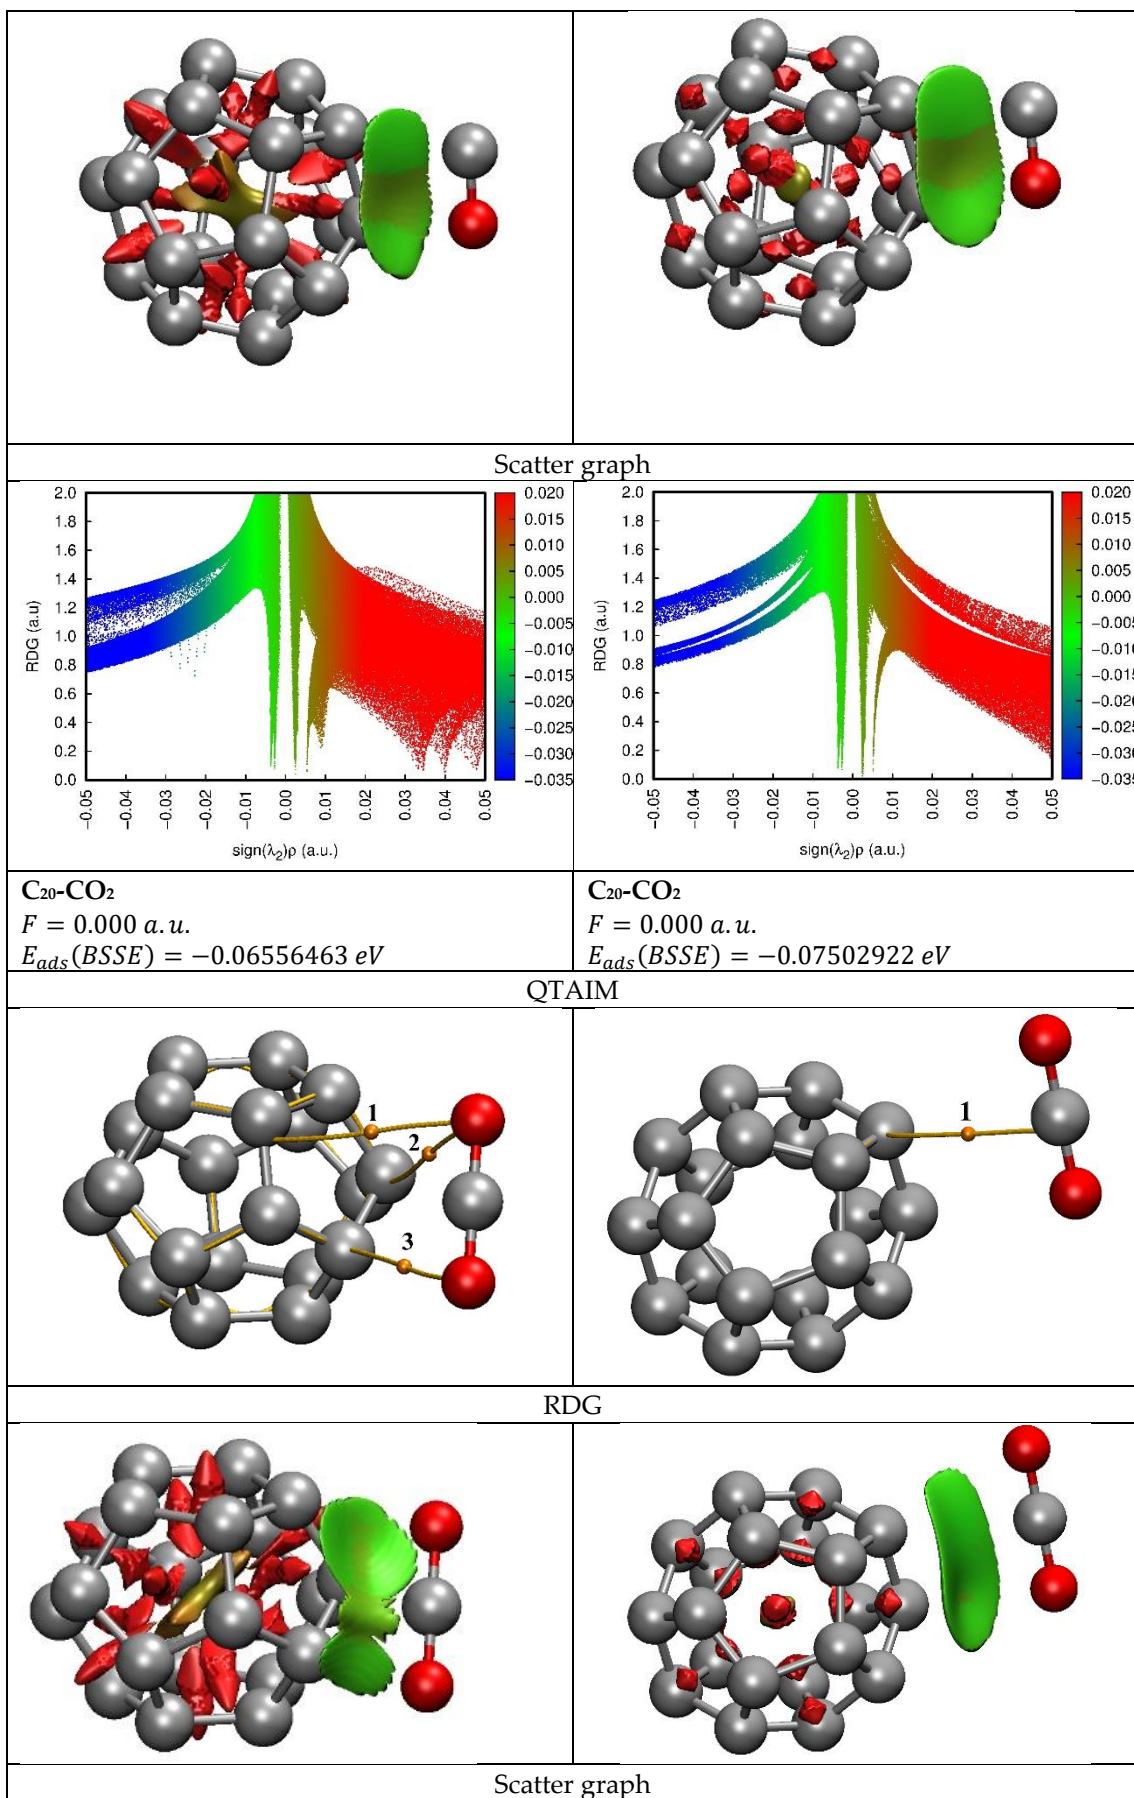



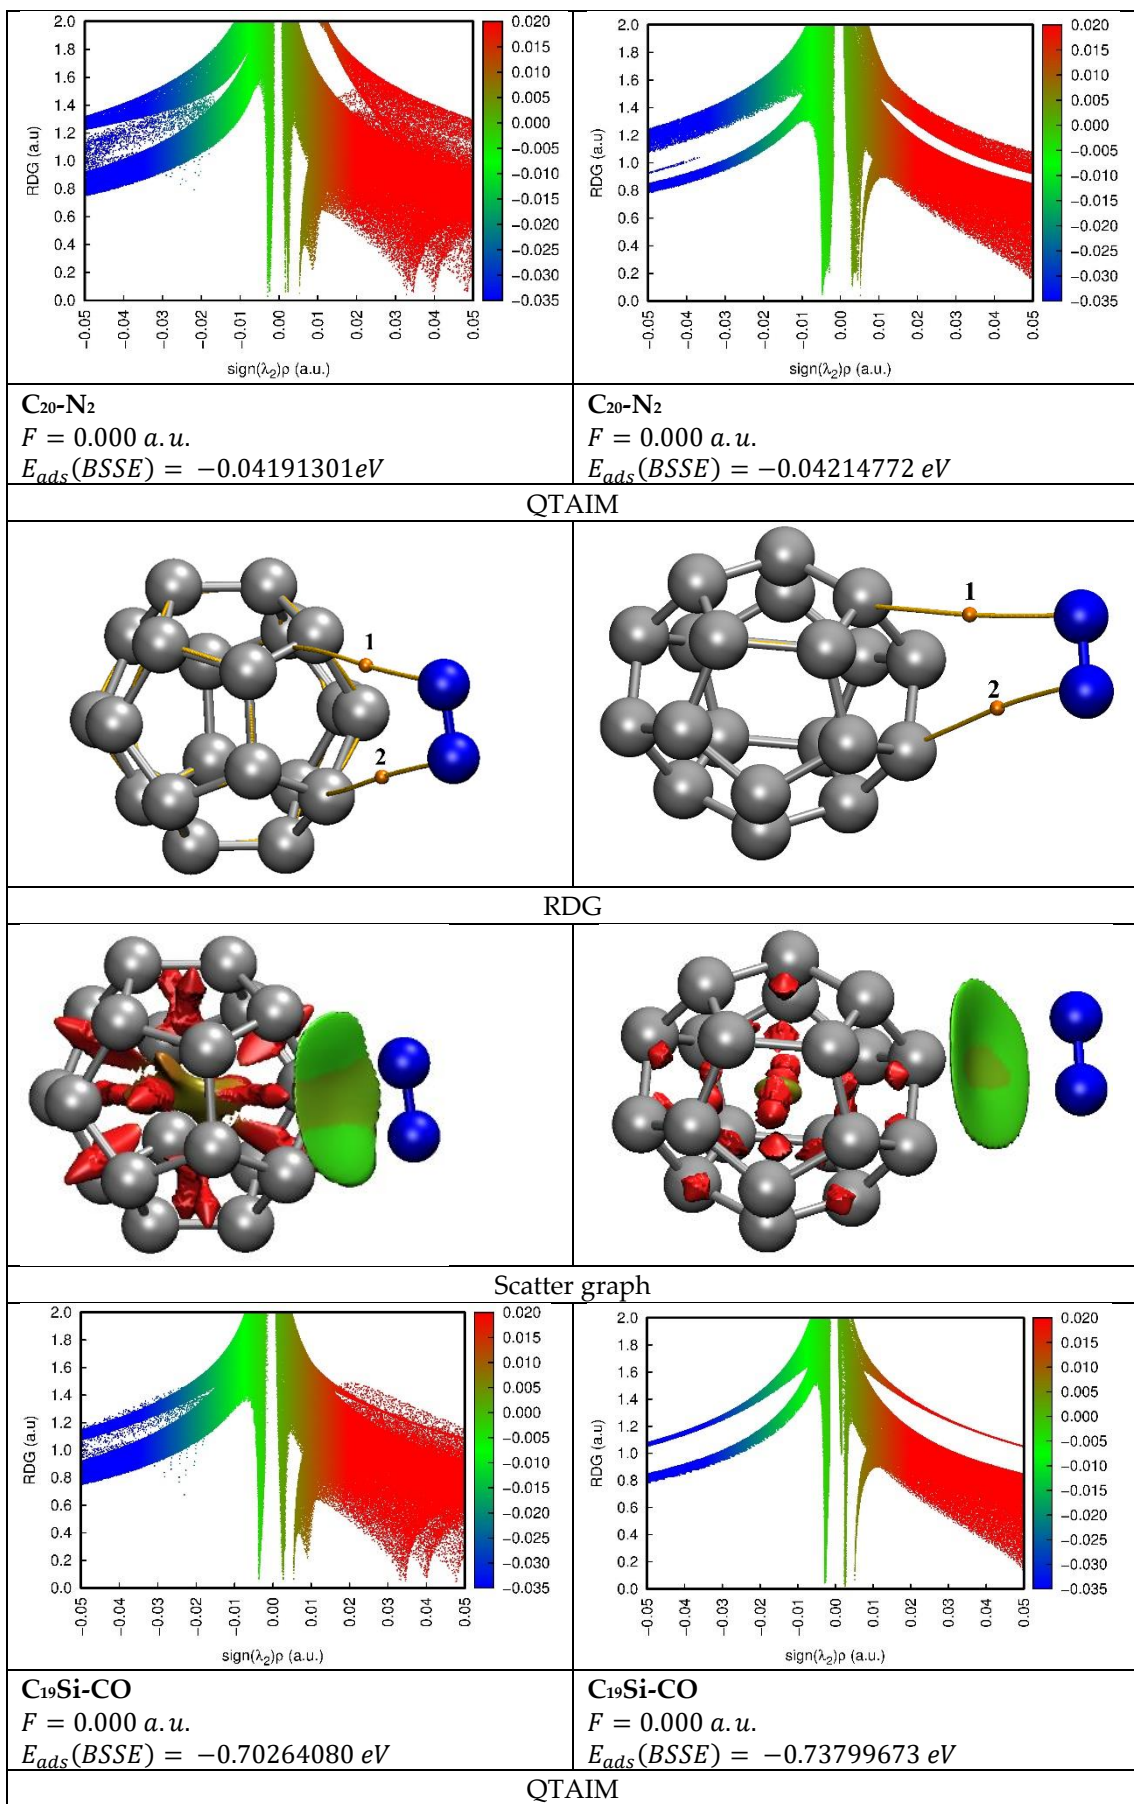

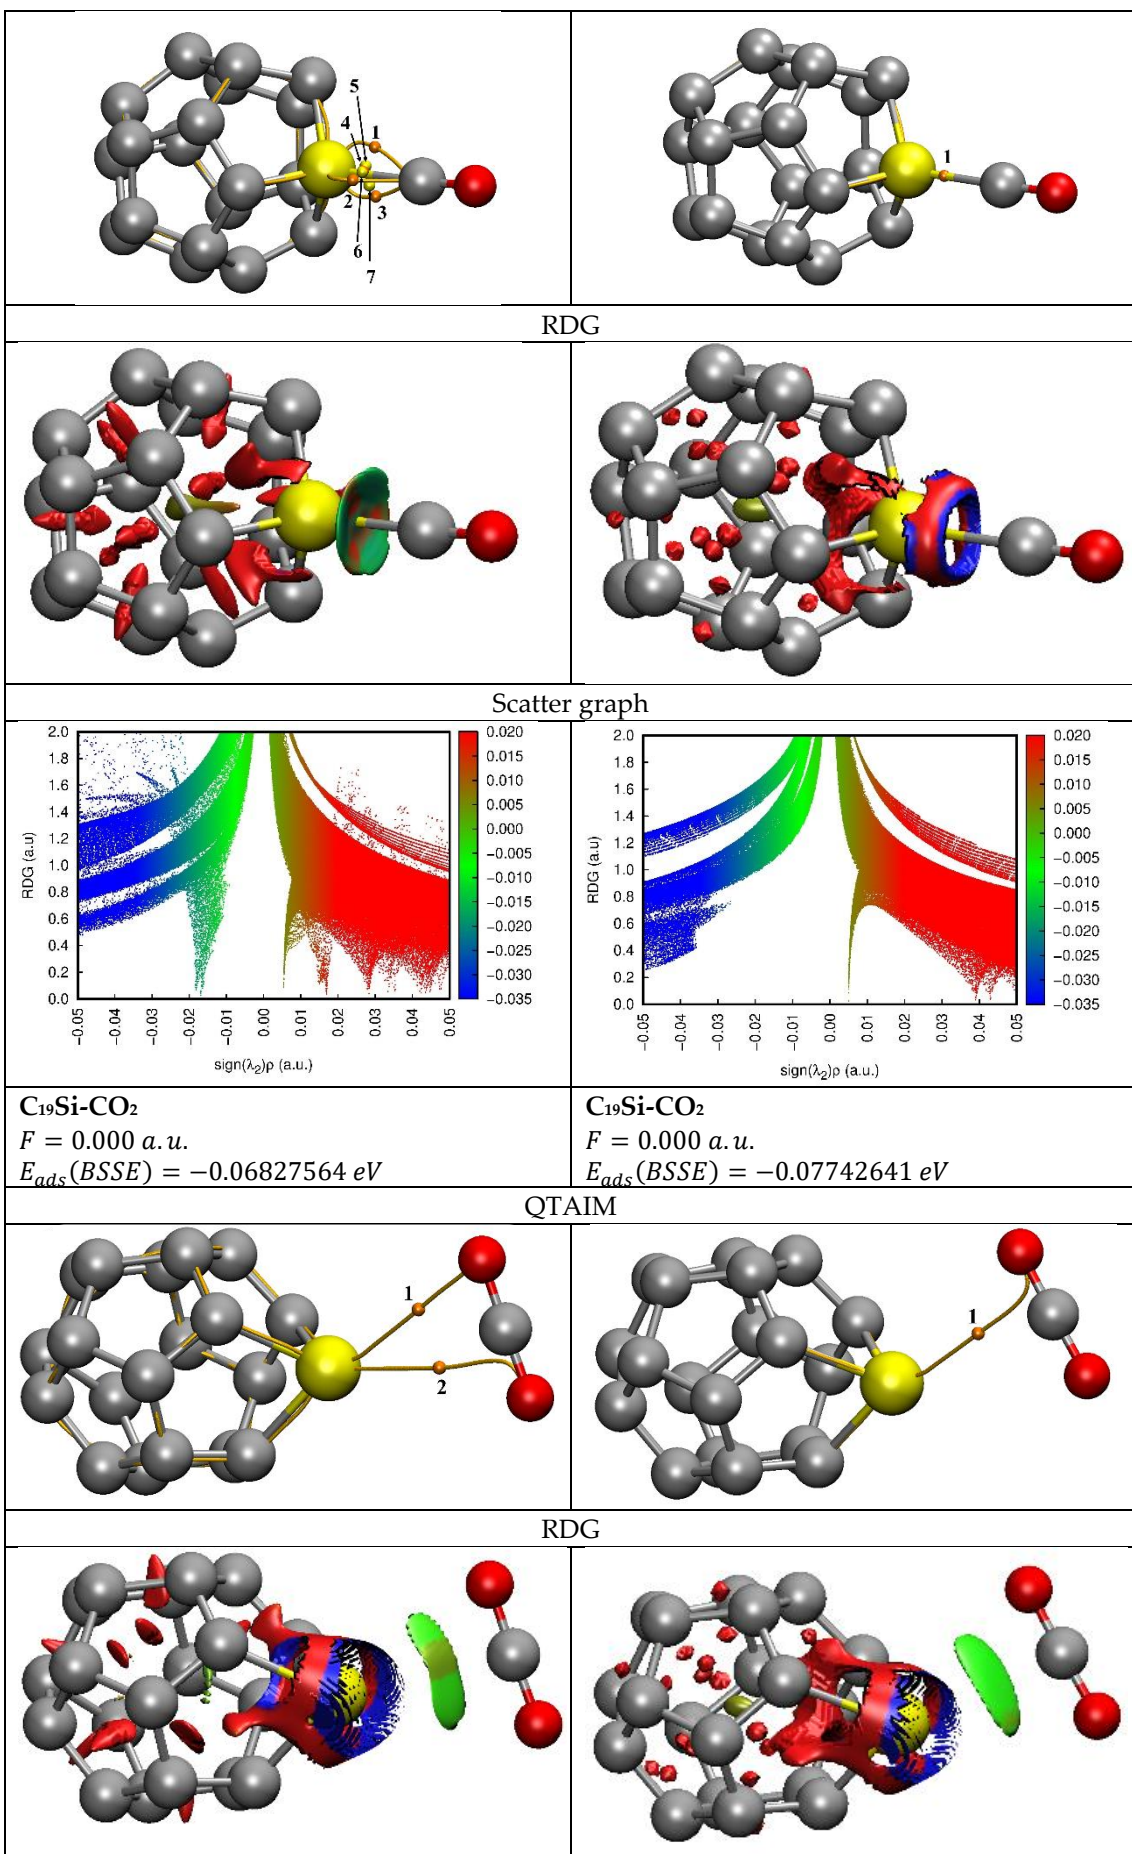

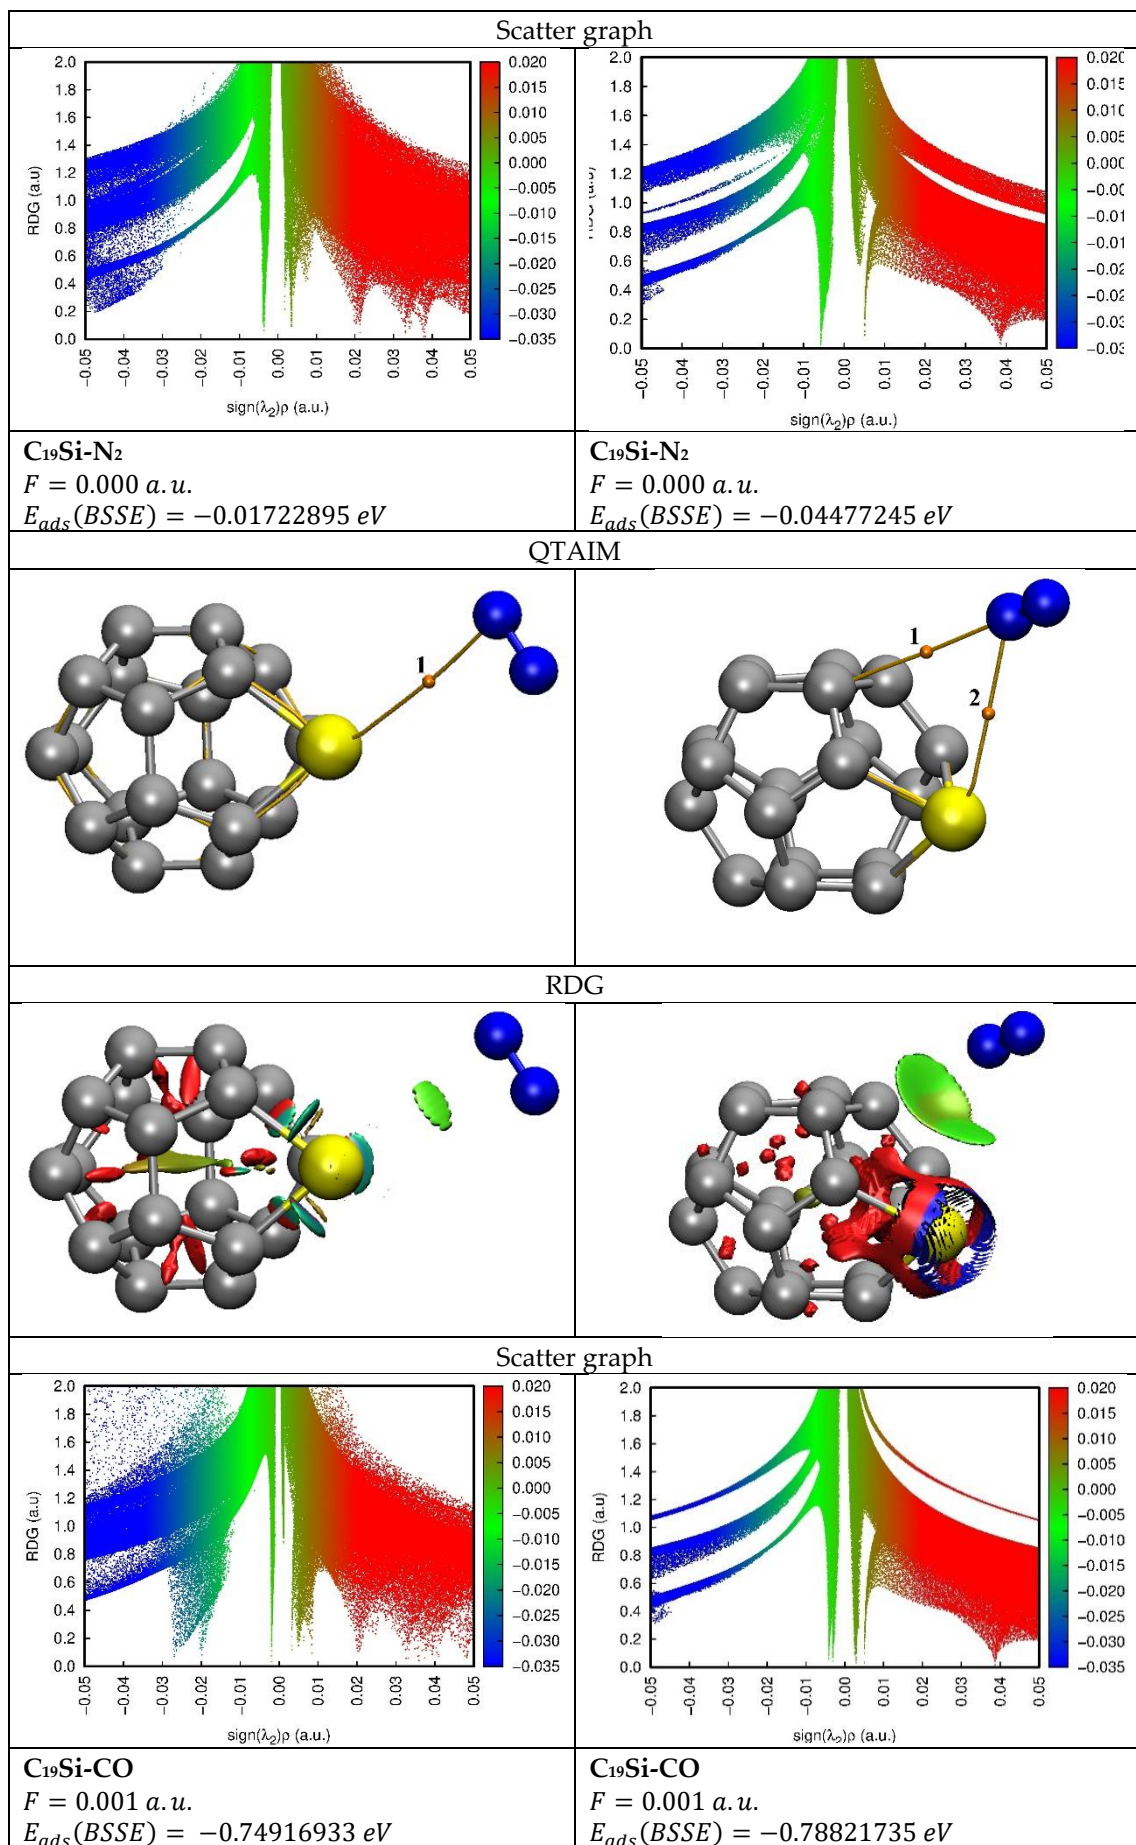



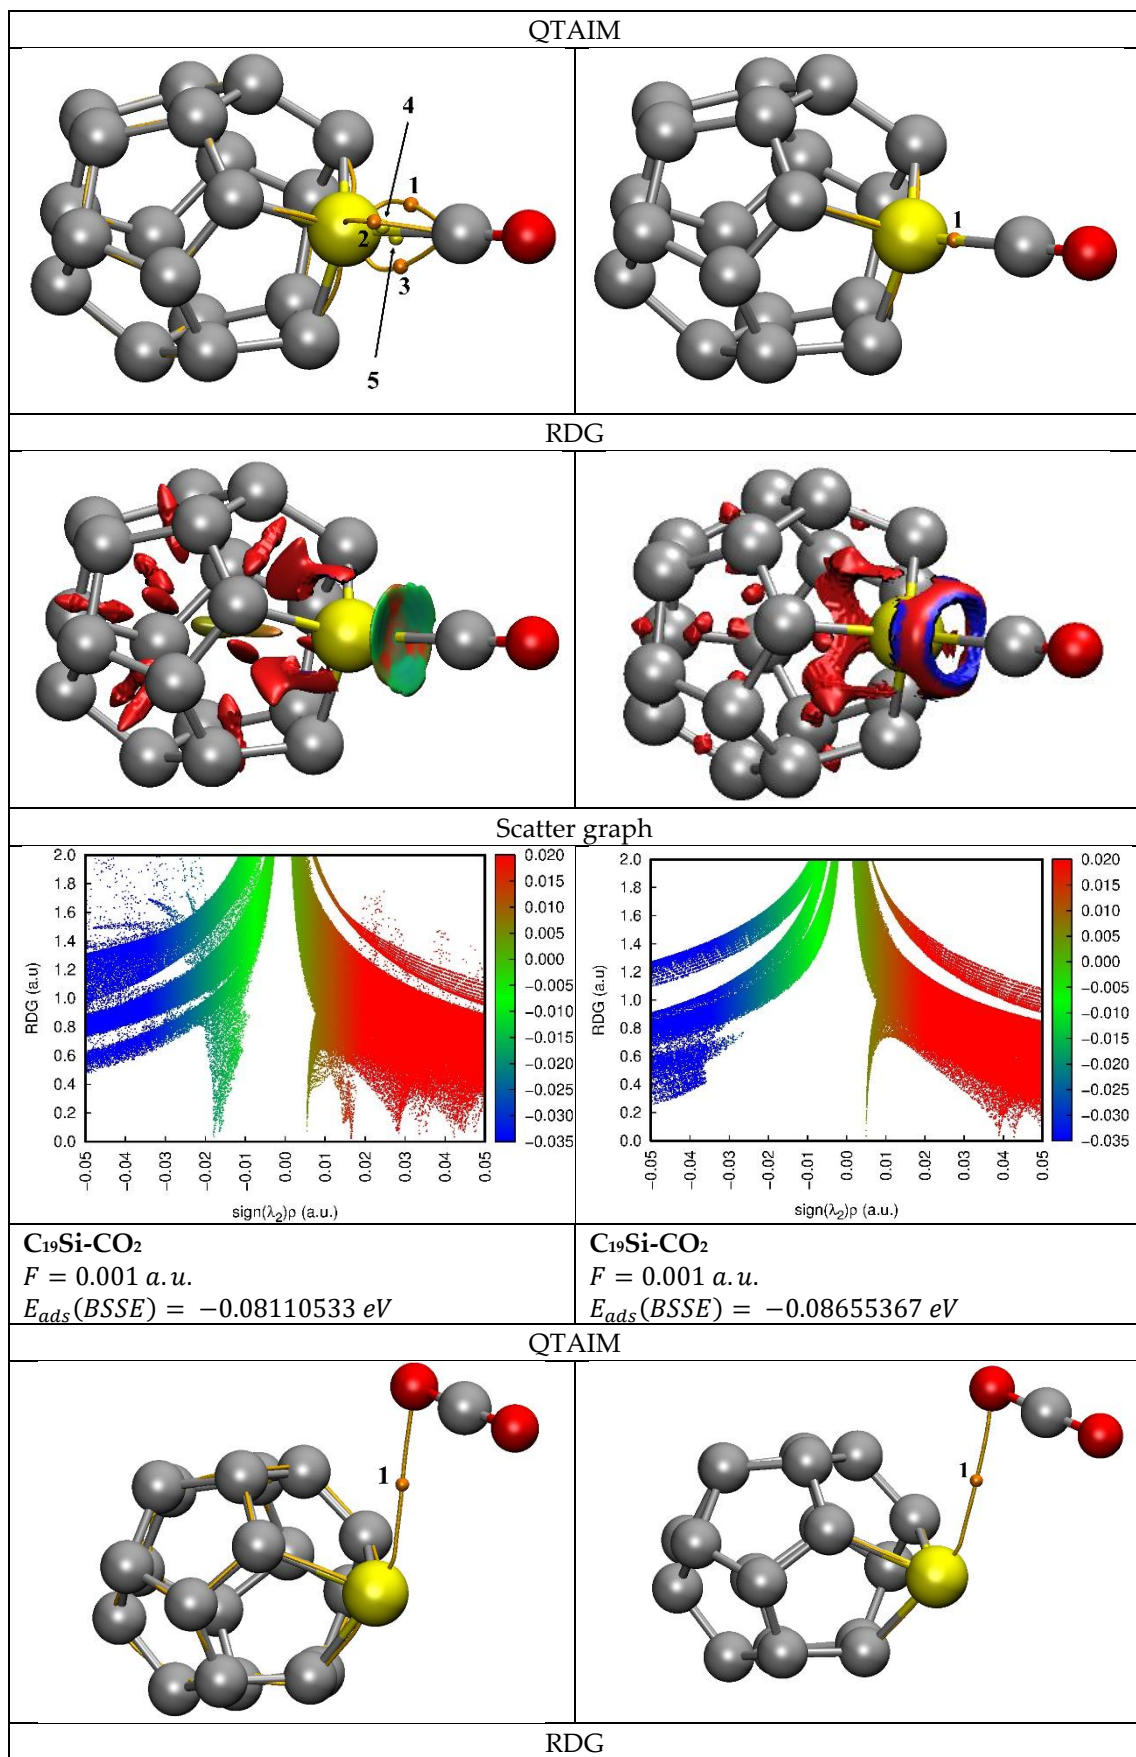

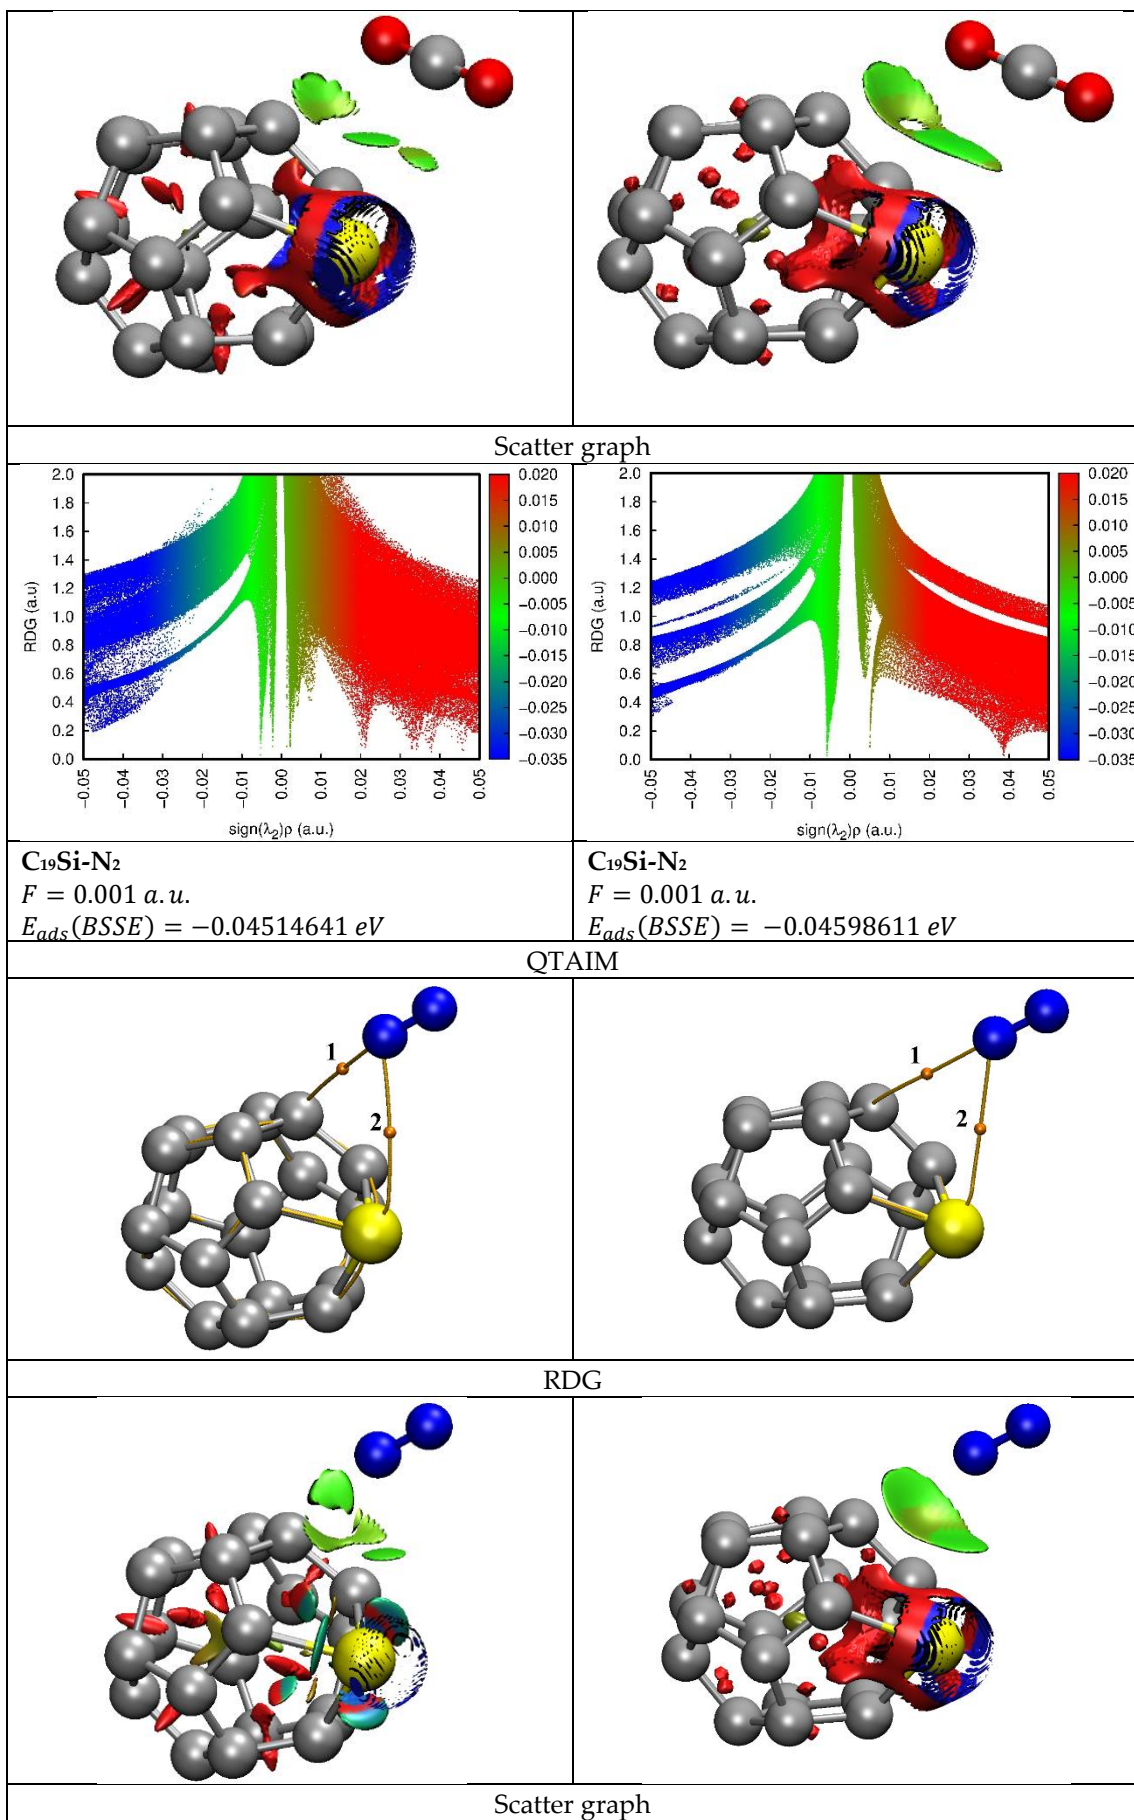

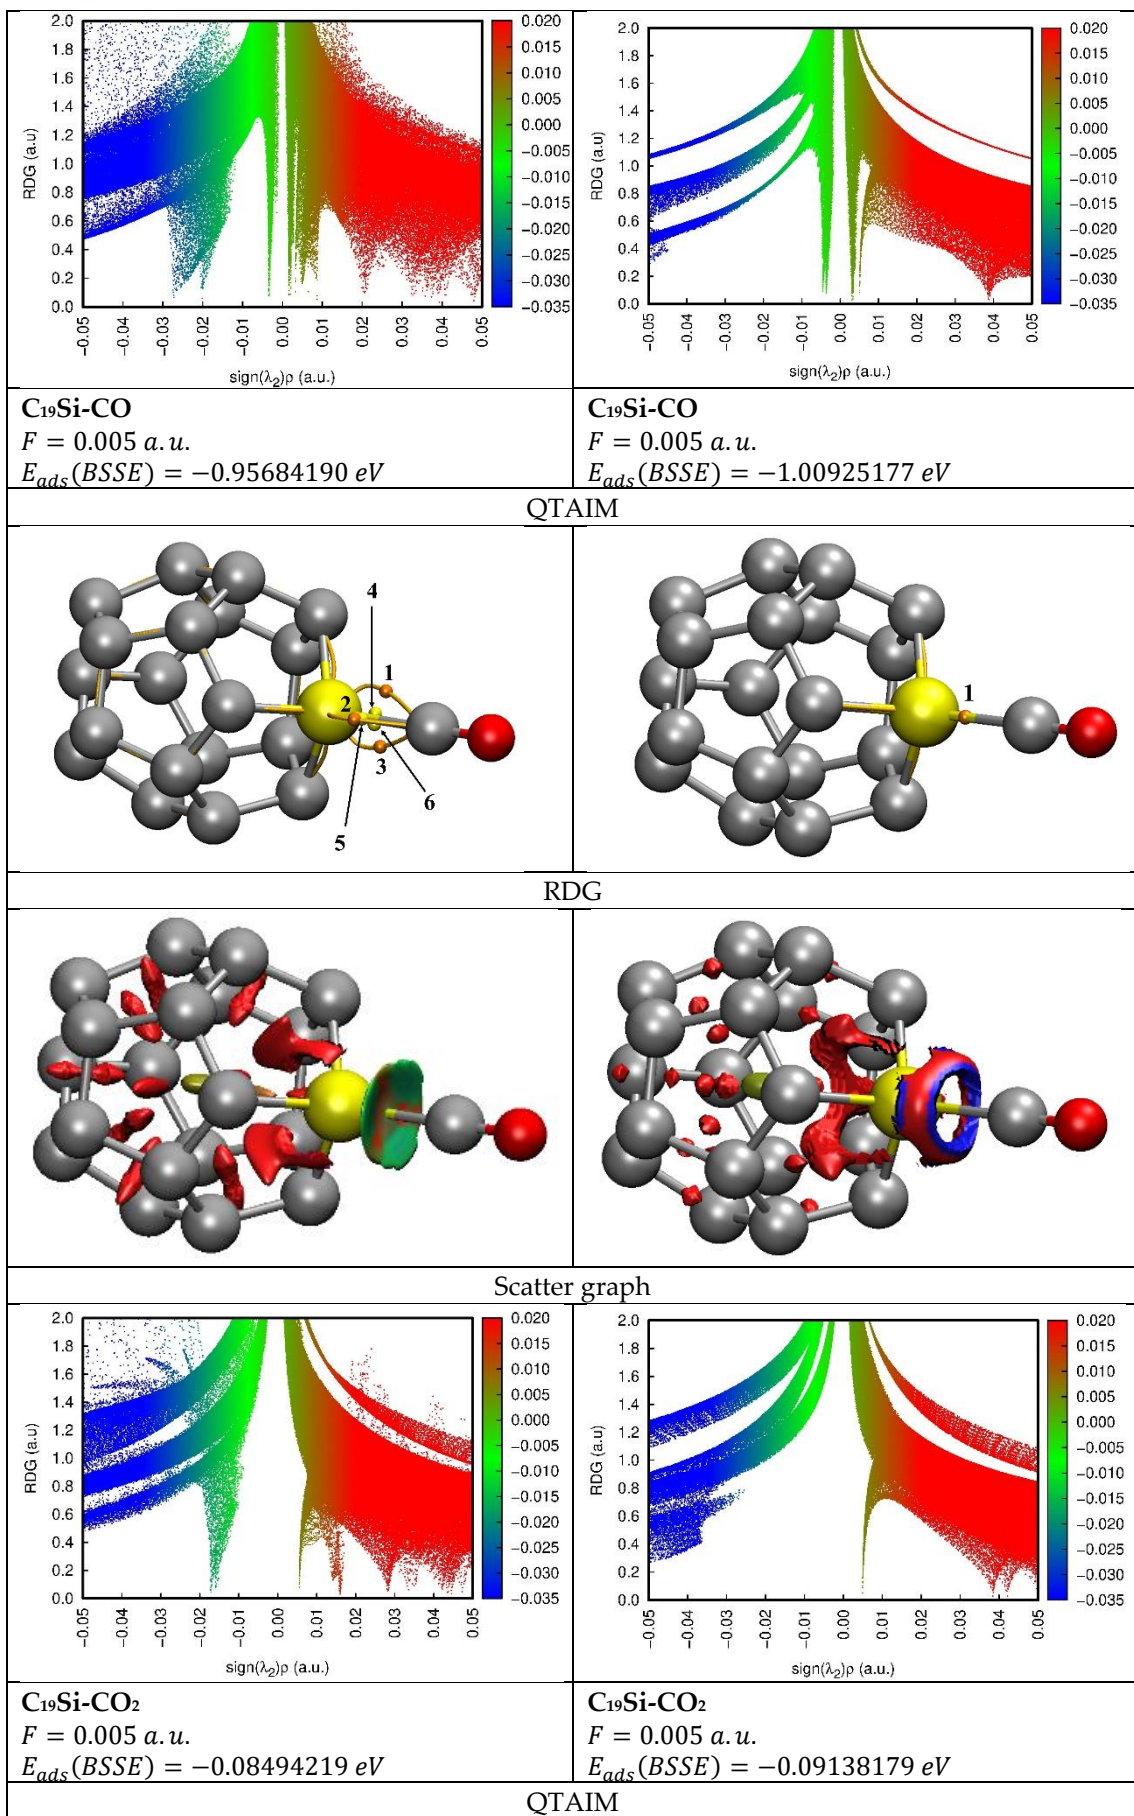



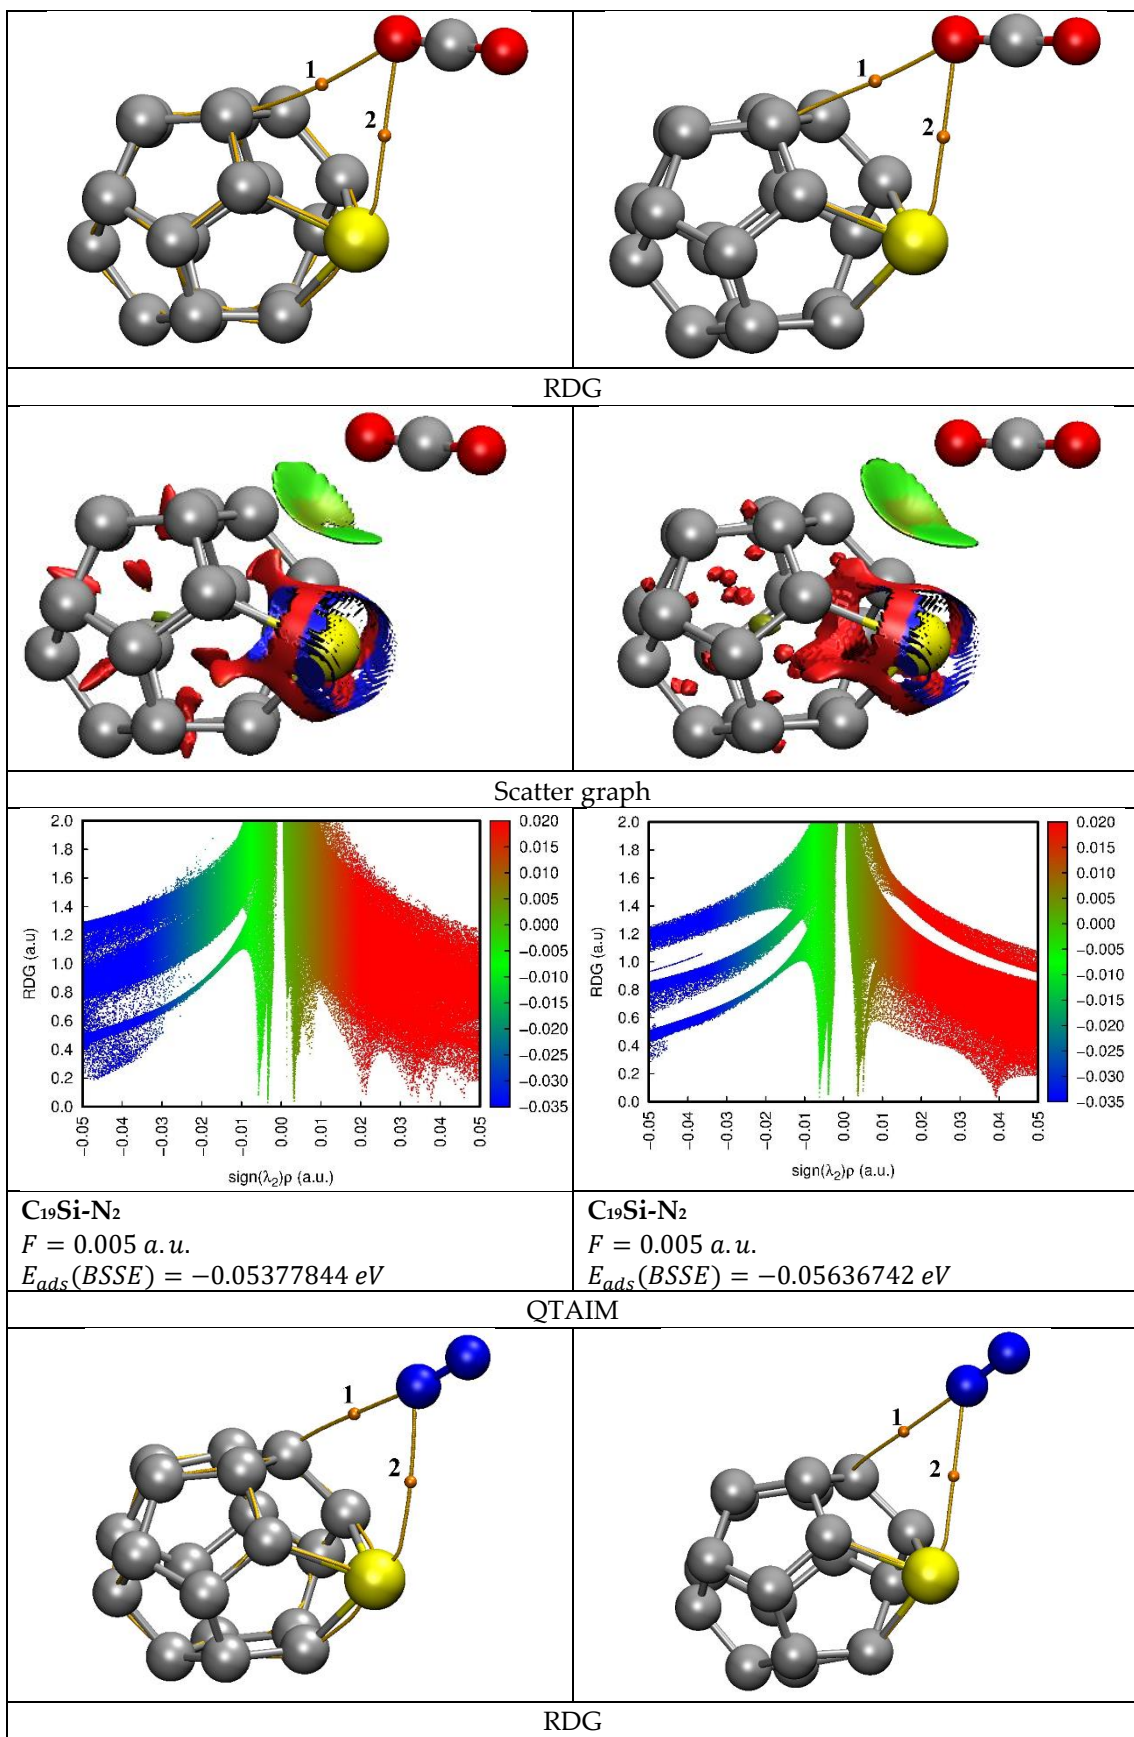

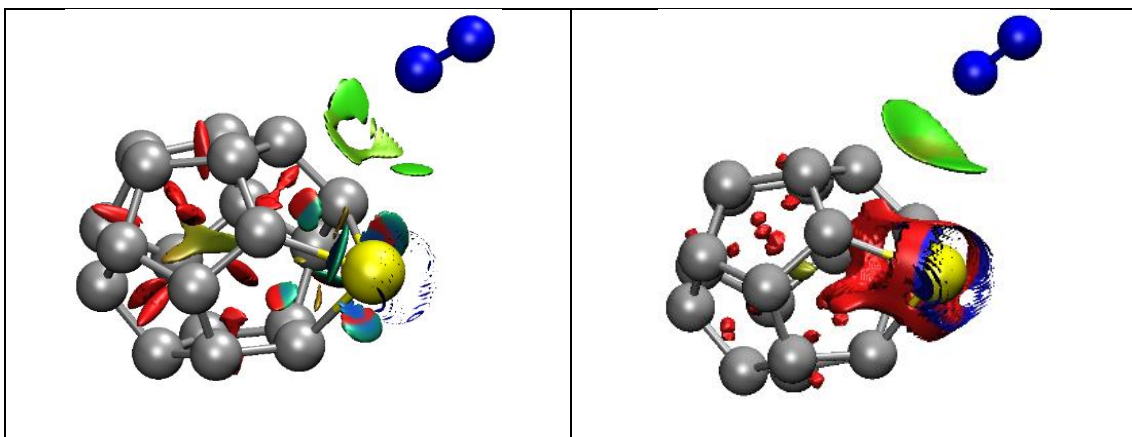

Scatter graph

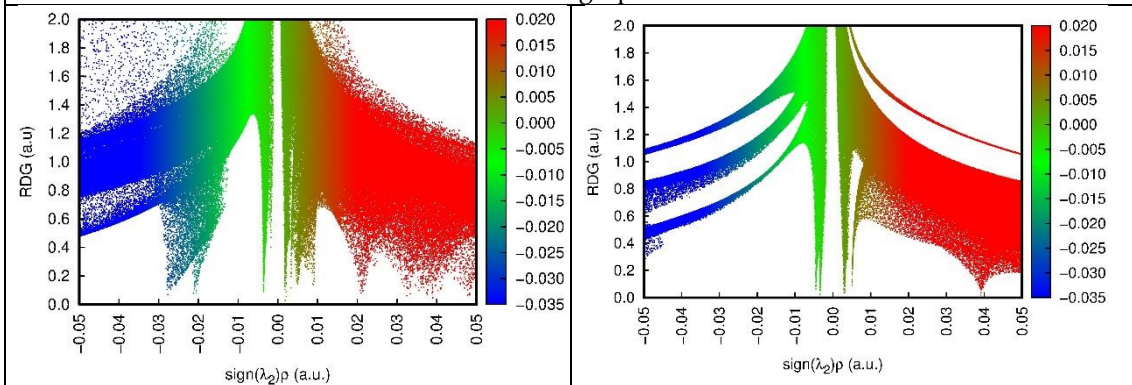

**C<sub>19</sub>Si-CO**

$F = 0.010 \text{ a.u.}$

$E_{ads}(BSSE) = -1.26088602 \text{ eV}$

**C<sub>19</sub>Si-CO**

$F = 0.010 \text{ a.u.}$

$E_{ads}(BSSE) = -1.32802545 \text{ eV}$

QTAIM

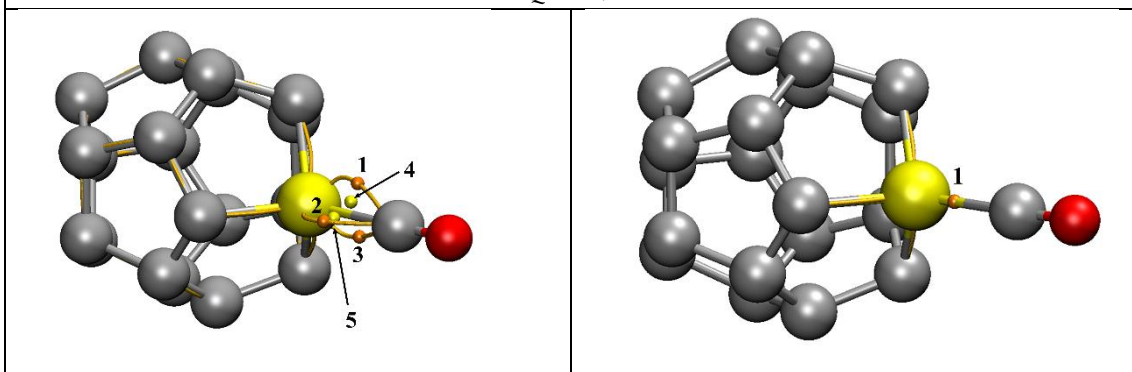

RDG

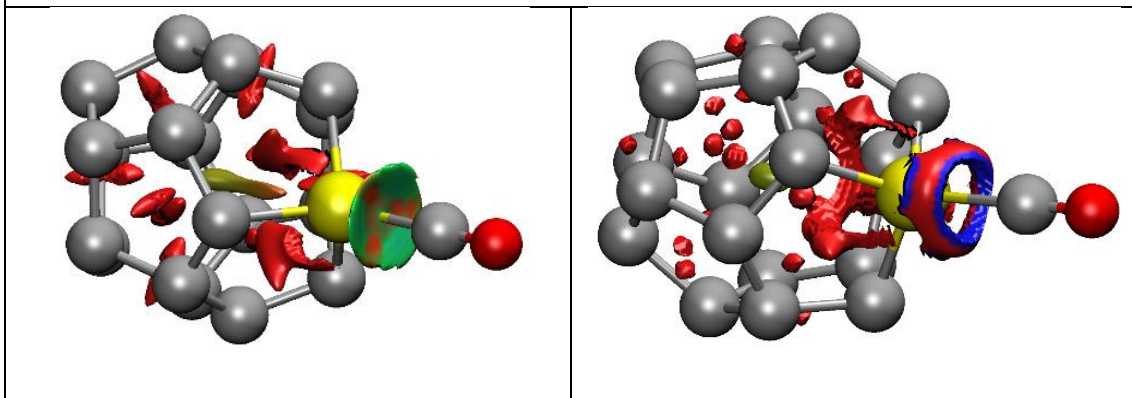

Scatter graph



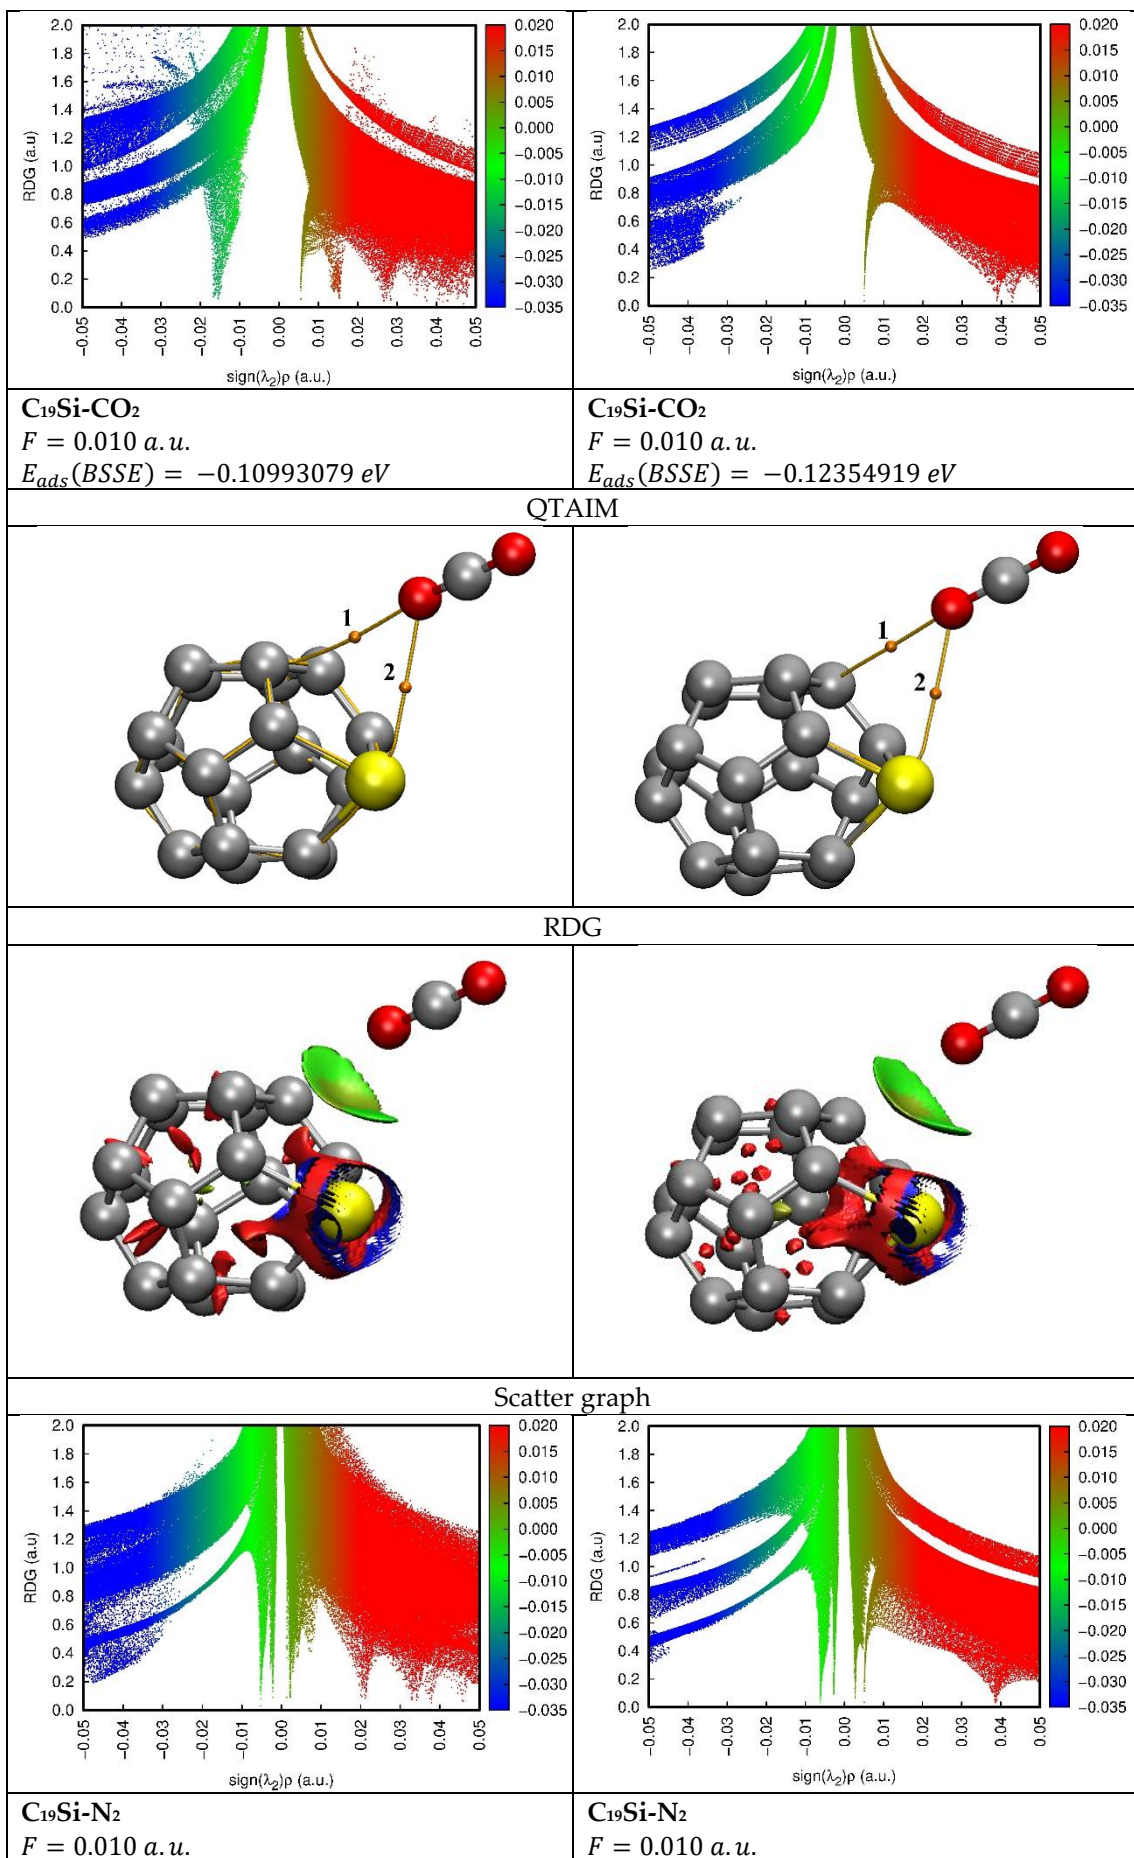

|                                                                                                    |  |                                                                                                    |  |
|----------------------------------------------------------------------------------------------------|--|----------------------------------------------------------------------------------------------------|--|
| $E_{ads}(BSSE) = -0.07166555 \text{ eV}$                                                           |  | $E_{ads}(BSSE) = -0.07659200 \text{ eV}$                                                           |  |
| QTAIM                                                                                              |  |                                                                                                    |  |
| 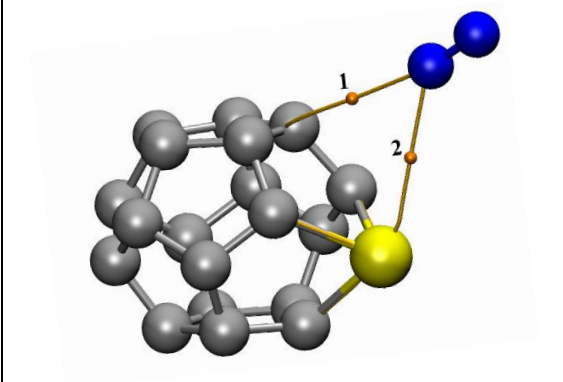                  |  |                  |  |
| RDG                                                                                                |  |                                                                                                    |  |
|                  |  |                 |  |
| Scatter graph                                                                                      |  |                                                                                                    |  |
|                 |  |                |  |
| <b>C<sub>19</sub>Si-CO</b><br>$F = 0.015 \text{ a.u.}$<br>$E_{ads}(BSSE) = -1.60888130 \text{ eV}$ |  | <b>C<sub>19</sub>Si-CO</b><br>$F = 0.015 \text{ a.u.}$<br>$E_{ads}(BSSE) = -1.69386335 \text{ eV}$ |  |
| QTAIM                                                                                              |  |                                                                                                    |  |
|                 |  |                |  |
| RDG                                                                                                |  |                                                                                                    |  |

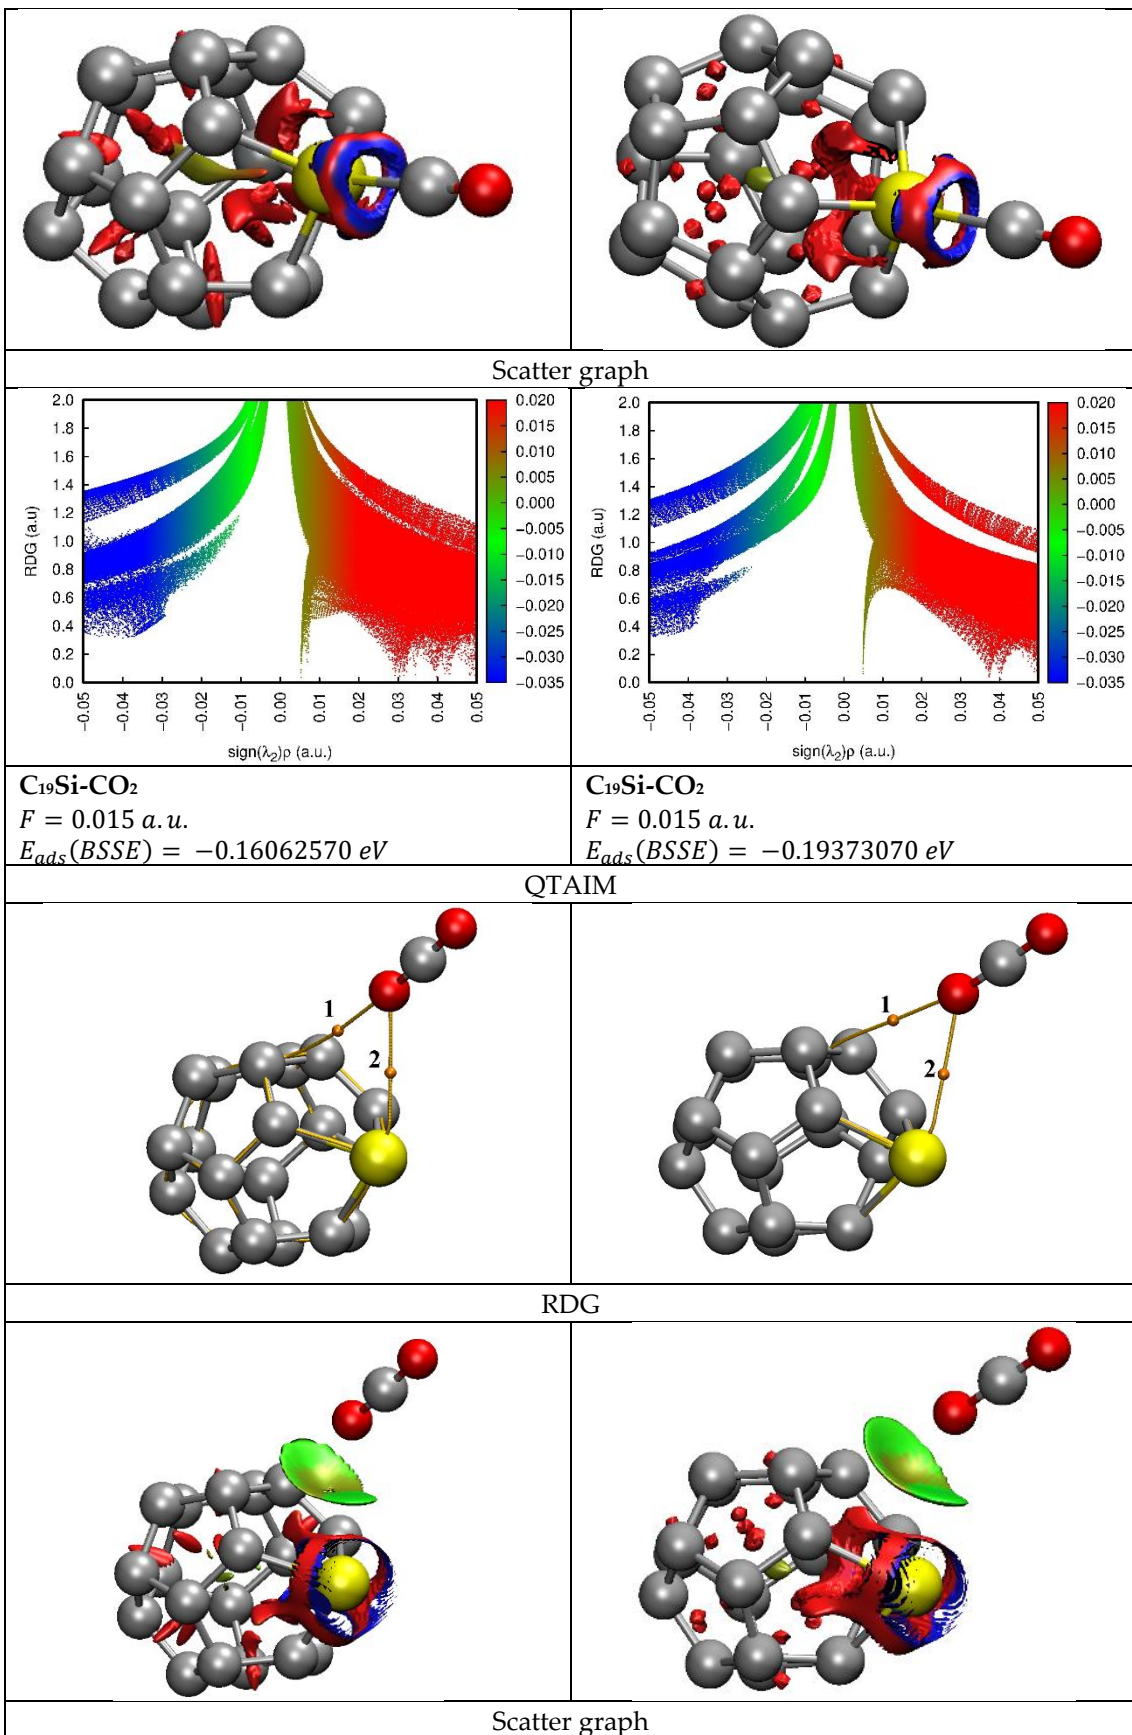



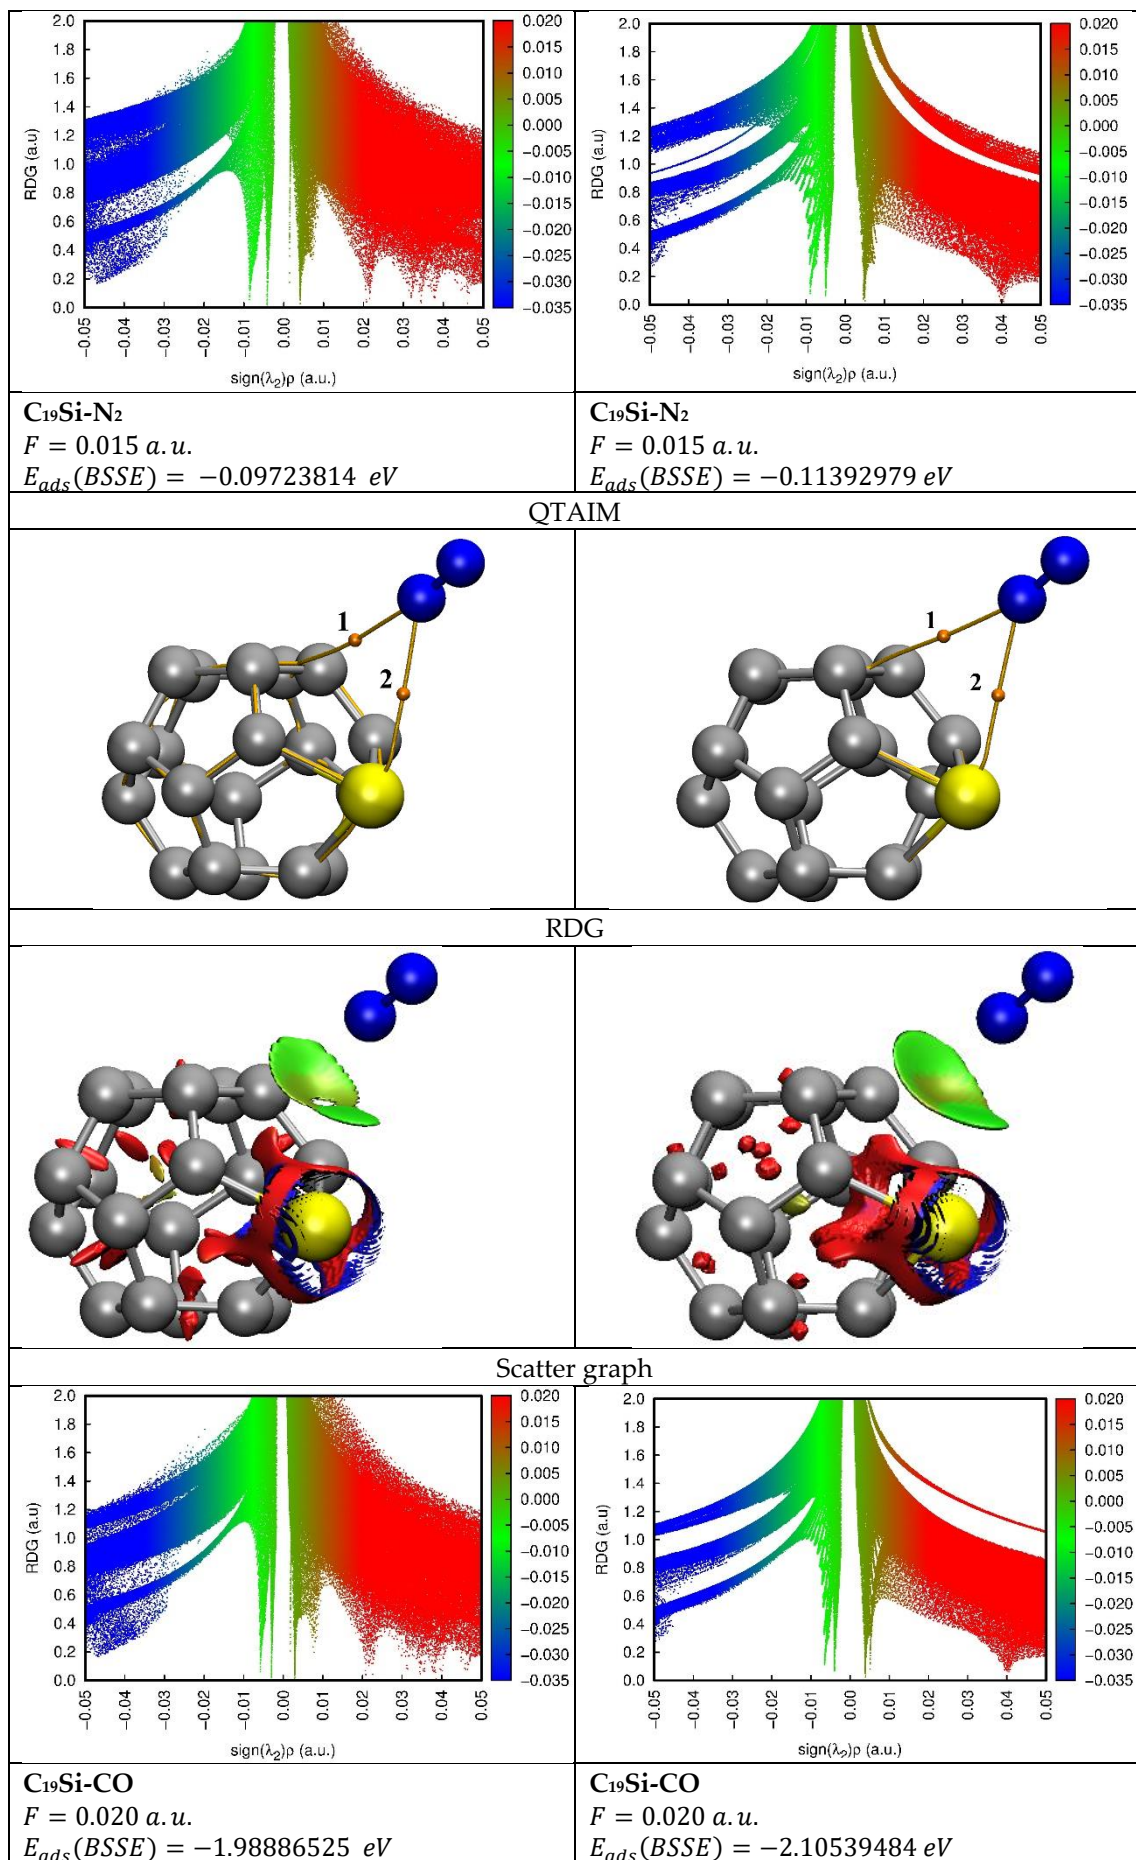

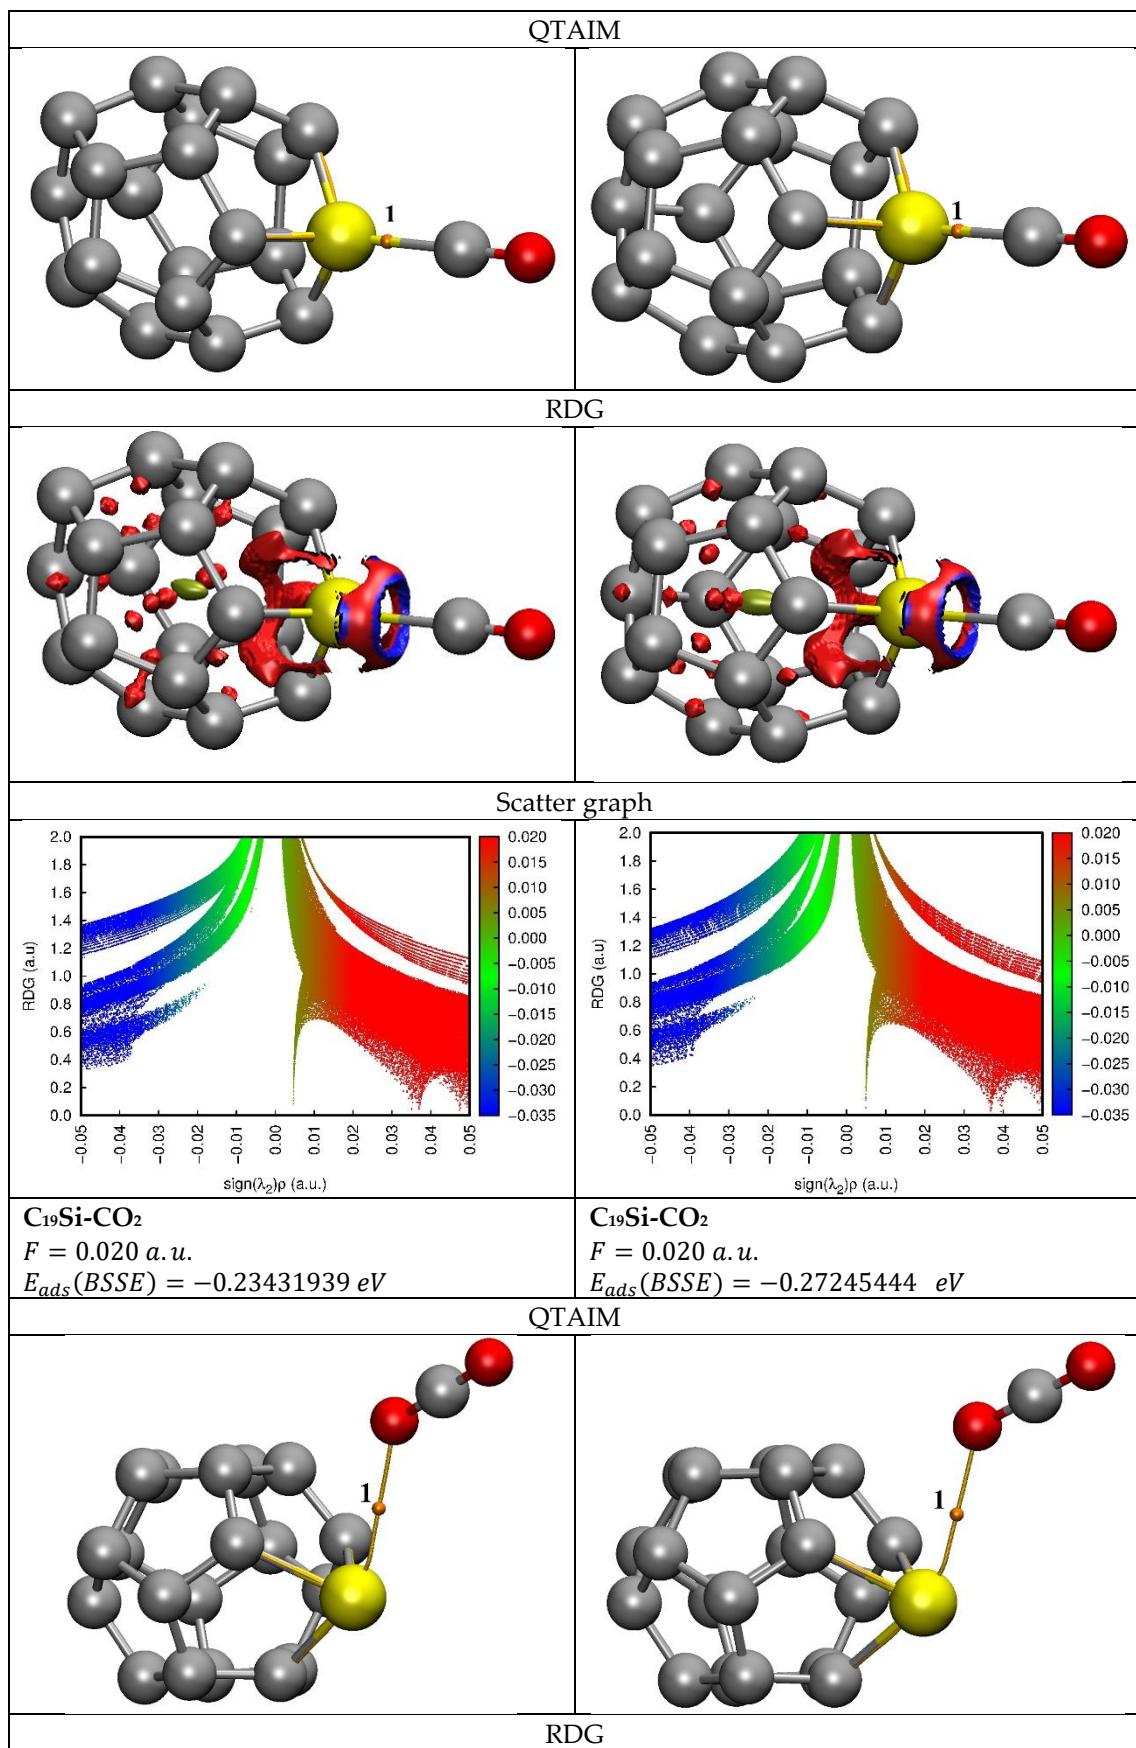

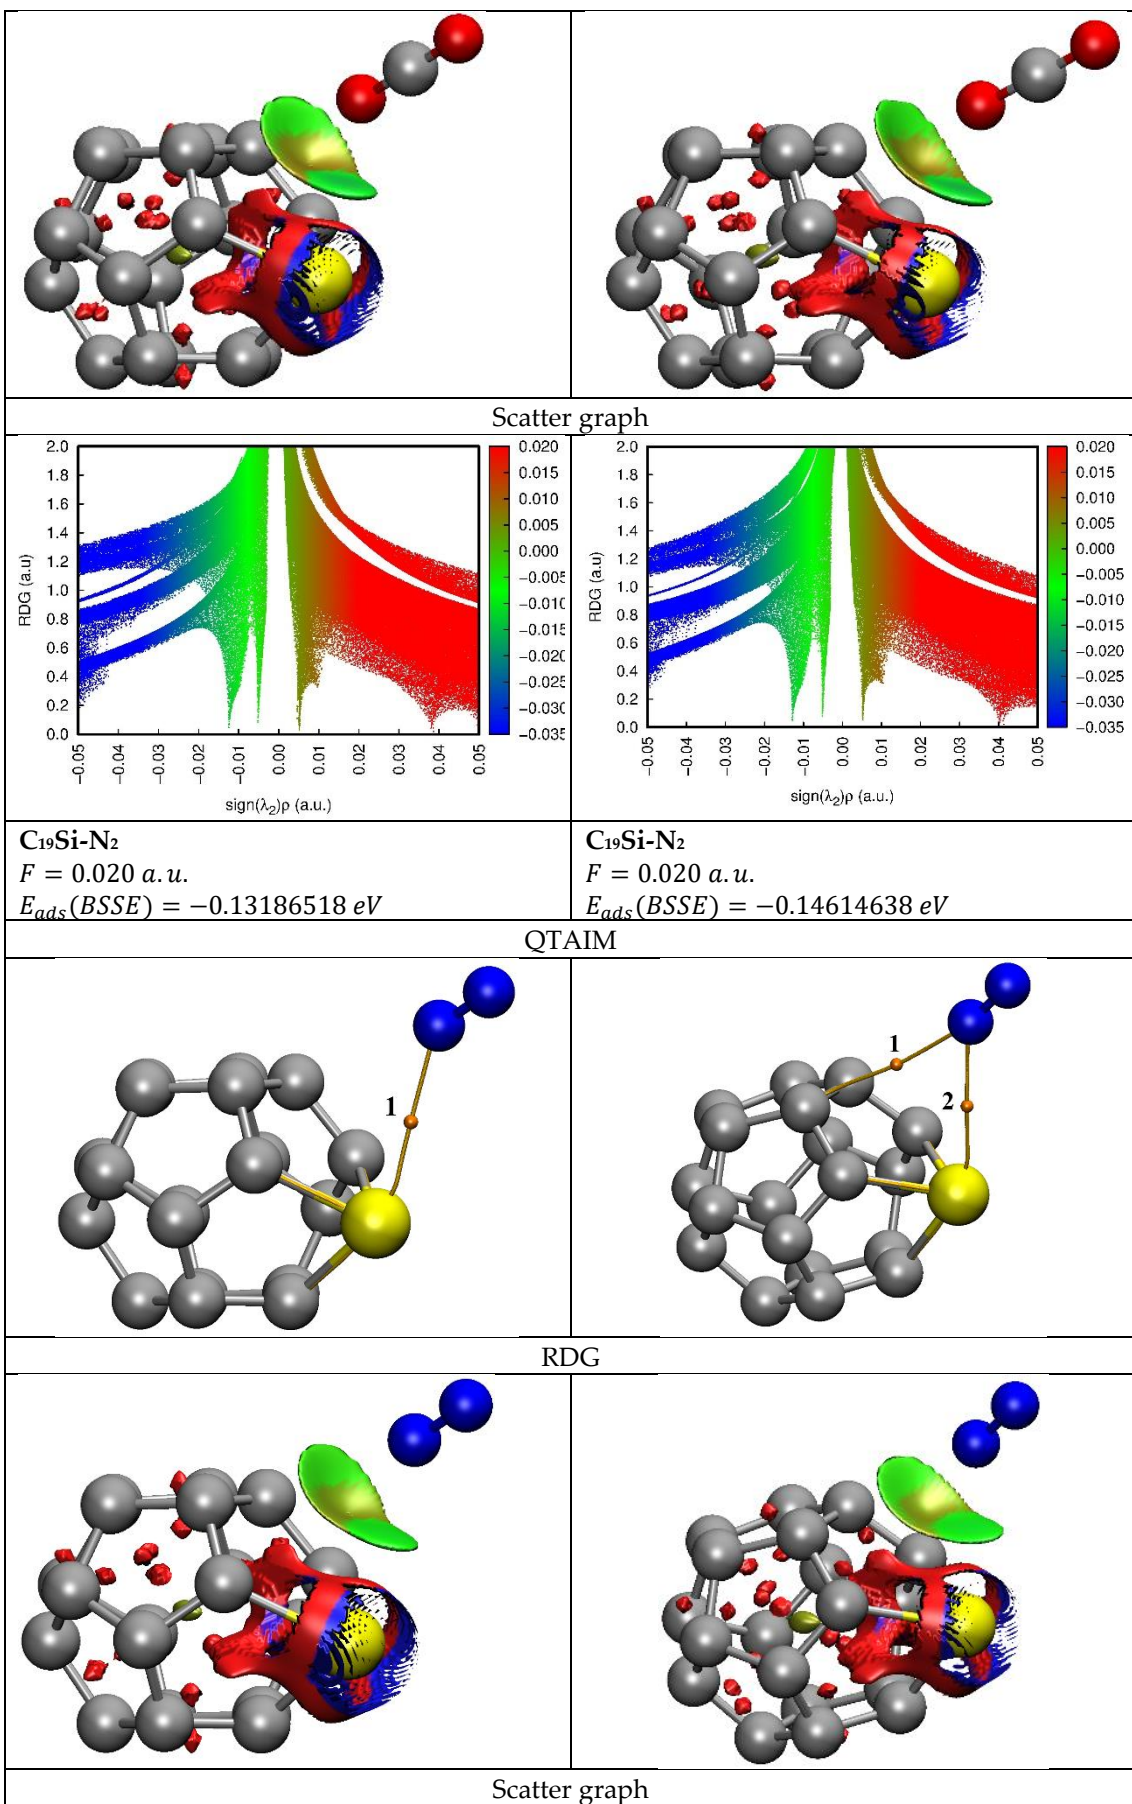



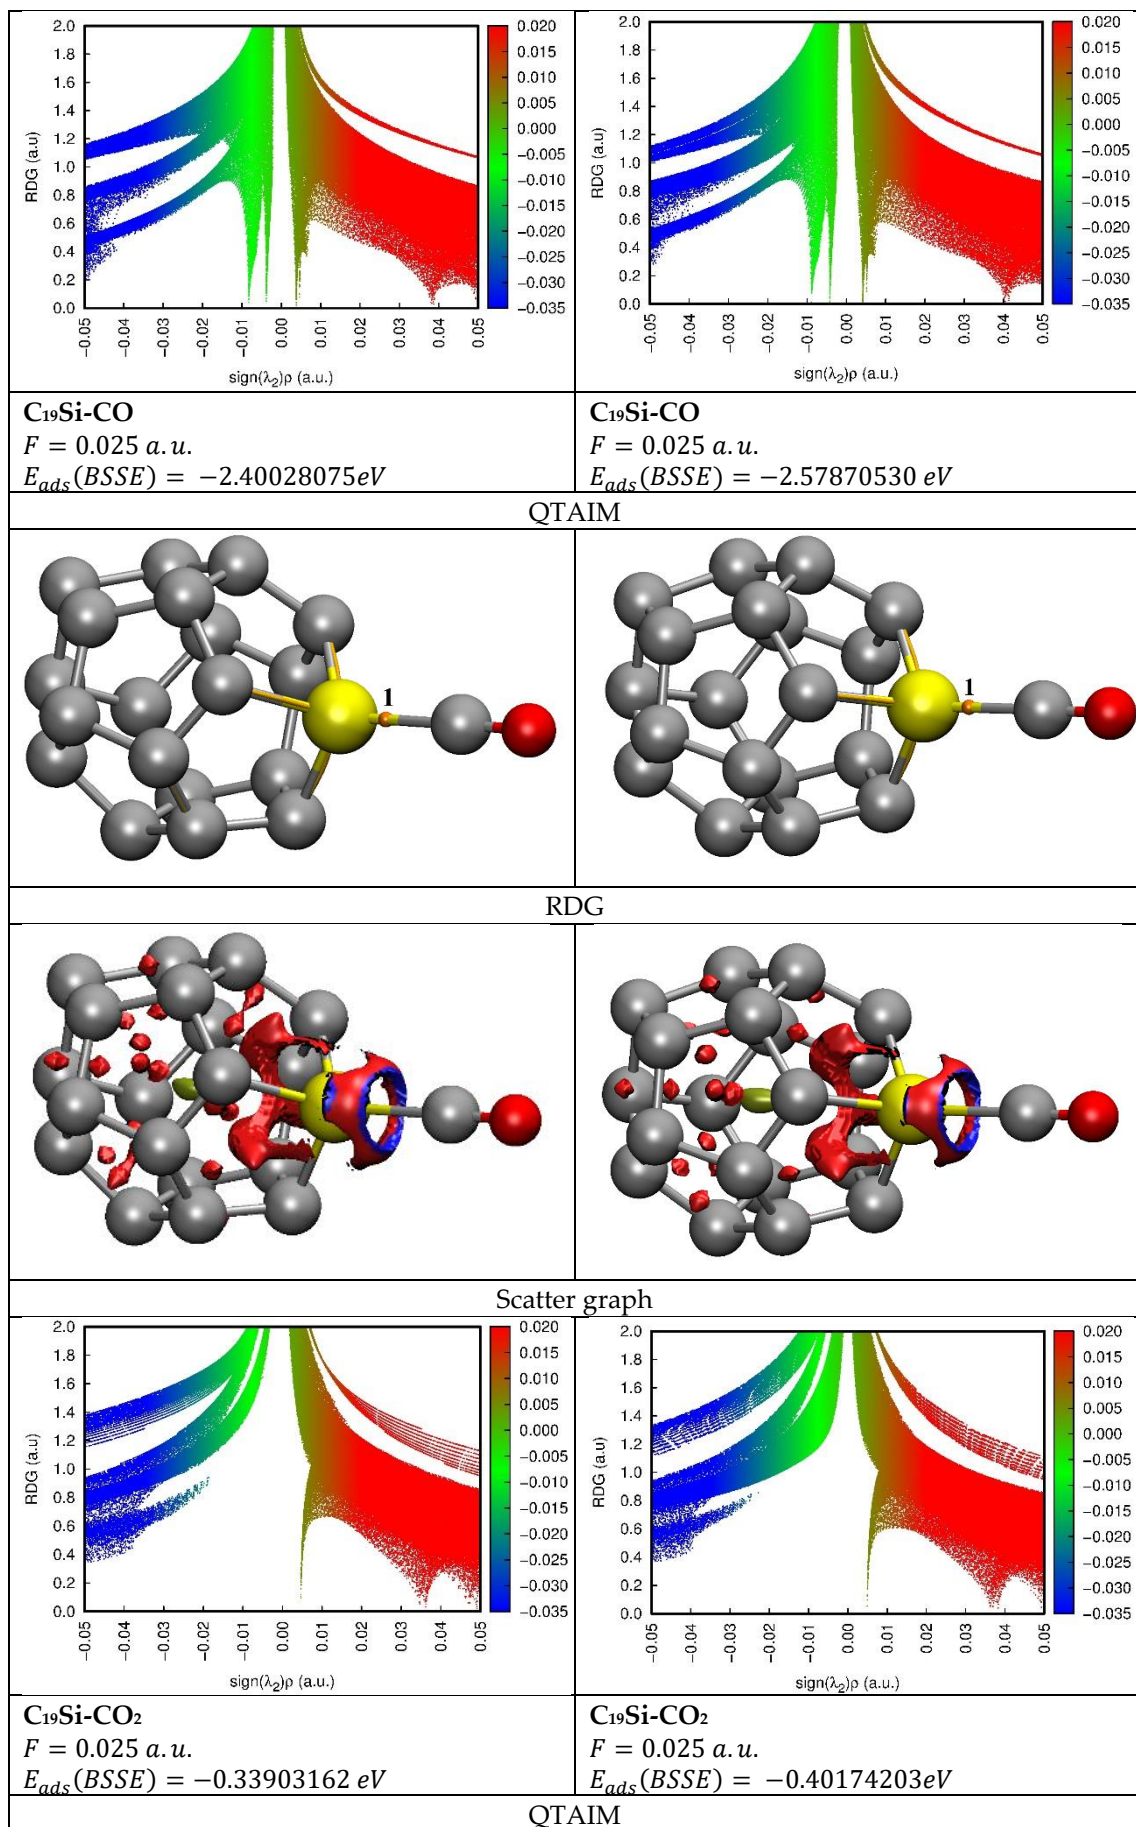

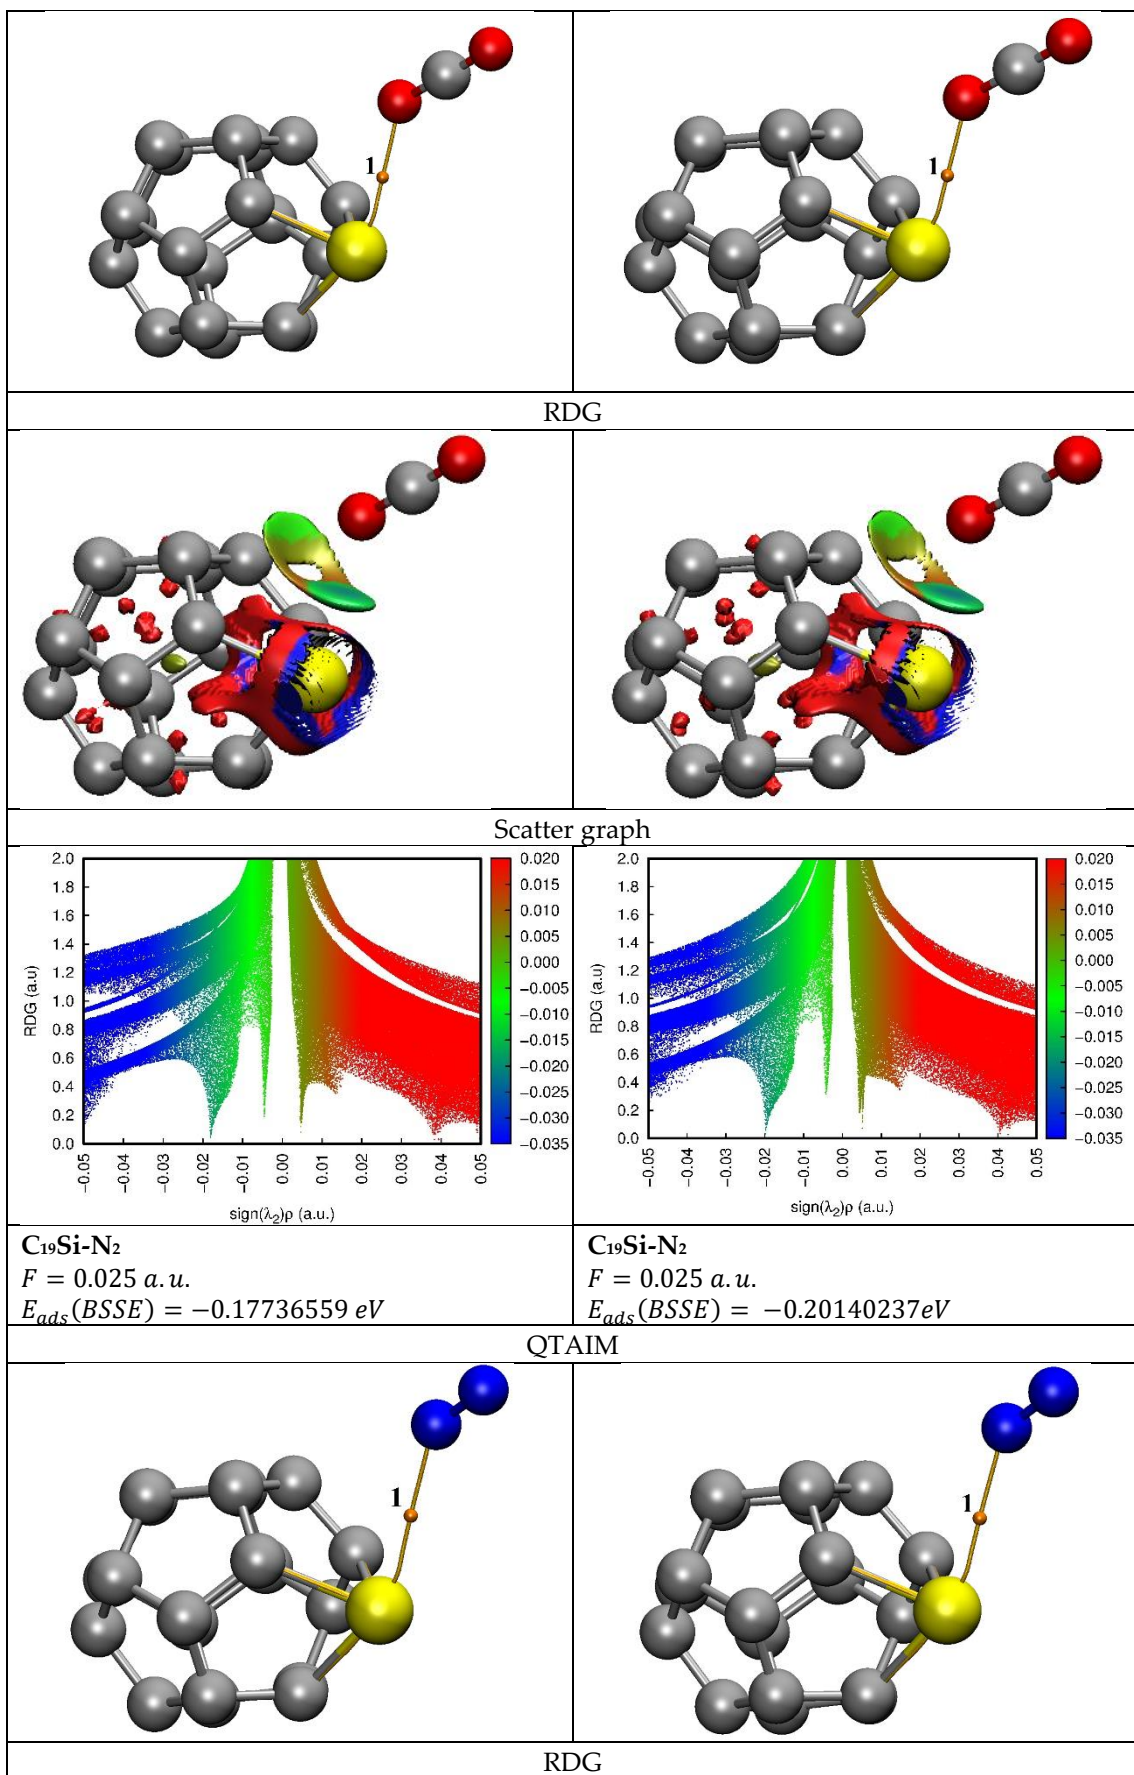



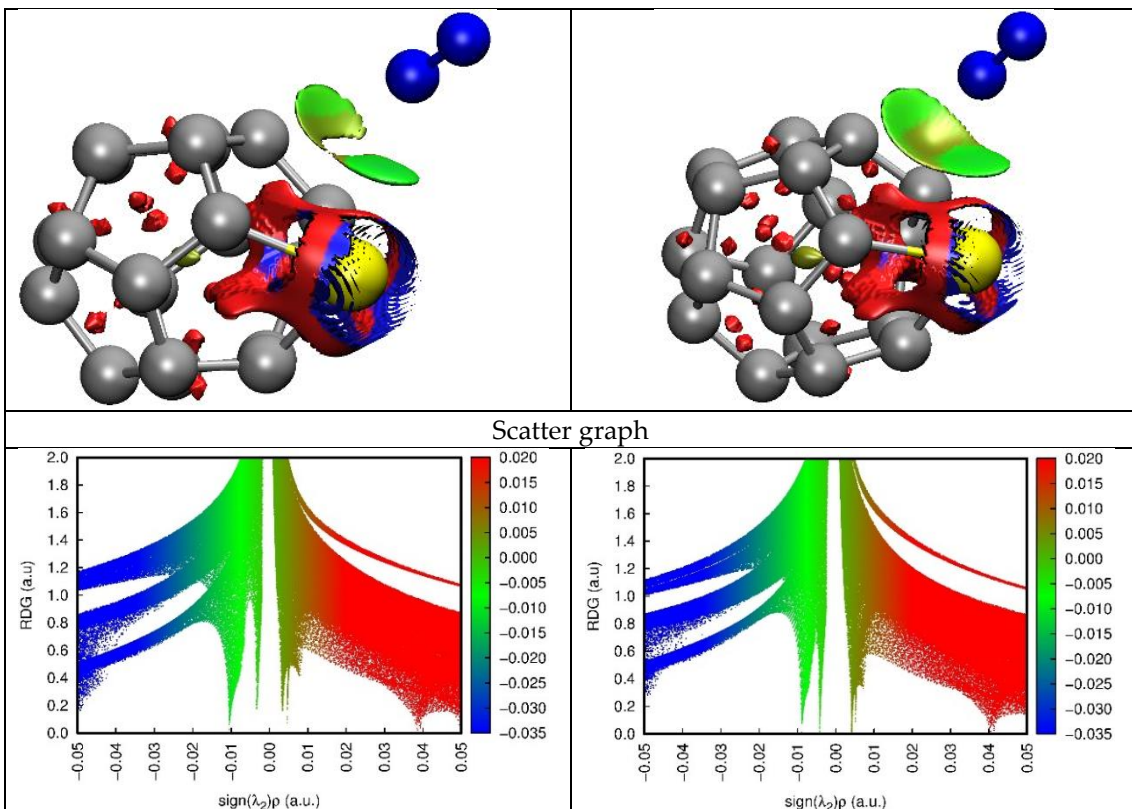

Supplement: s1 [file s1]
